# Supplementary material for: Ultrasonic strain elastography for detecting abnormalities in the supraspinatus tendon: an intra- and inter-rater reliability study
Source: PubMed Central journal article supplement — BMJ Open. 2019 May 9;9(5):e027725. doi: 10.1136/bmjopen-2018-027725 (PMC6527995; doi:10.1136/bmjopen-2018-027725), 2019-05-09
Supplement: bmjopen-2018-027725.draft_revisions.pdf [file bmjopen-2018-027725.draft_revisions.pdf]

# BMJ Open

BMJ Open is committed to open peer review. As part of this commitment we make the peer review history of every article we publish publicly available.

When an article is published we post the peer reviewers' comments and the authors' responses online. We also post the versions of the paper that were used during peer review. These are the versions that the peer review comments apply to.

The versions of the paper that follow are the versions that were submitted during the peer review process. They are not the versions of record or the final published versions. They should not be cited or distributed as the published version of this manuscript.

BMJ Open is an open access journal and the full, final, typeset and author-corrected version of record of the manuscript is available on our site with no access controls, subscription charges or pay-per-view fees (<http://bmjopen.bmj.com>).

If you have any questions on BMJ Open's open peer review process please email [info.bmjopen@bmj.com](mailto:info.bmjopen@bmj.com)

# BMJ Open

## ULTRASONIC STRAIN ELASTOGRAPHY FOR DETECTING ABNORMALITIES WITHIN THE SUPRASPINATUS TENDON: AN INTRA- AND INTERRATER RELIABILITY STUDY

|                               |                                                                                                                                                                                                                                                                                                                                                                                                                                                                                                         |
|-------------------------------|---------------------------------------------------------------------------------------------------------------------------------------------------------------------------------------------------------------------------------------------------------------------------------------------------------------------------------------------------------------------------------------------------------------------------------------------------------------------------------------------------------|
| Journal:                      | <i>BMJ Open</i>                                                                                                                                                                                                                                                                                                                                                                                                                                                                                         |
| Manuscript ID                 | bmjopen-2018-027725                                                                                                                                                                                                                                                                                                                                                                                                                                                                                     |
| Article Type:                 | Research                                                                                                                                                                                                                                                                                                                                                                                                                                                                                                |
| Date Submitted by the Author: | 08-Nov-2018                                                                                                                                                                                                                                                                                                                                                                                                                                                                                             |
| Complete List of Authors:     | Brage, K; University of Southern Denmark, Sport Science and Clinical Biomechanics<br>Hjarbaek, John; Odense Universitetshospital, Department of Radiology, Musculoskeletal section<br>Kjaer, Per ; University of Southern Denmark, Institute of Sports Science and Clinical Biomechanics<br>Ingwersen, Kim G.; Sports Science and Clinical Biomechanics<br>Juul-Kristensen, Birgit; Research Unit for Musculoskeletal Function and Physiotherapy, Institute of Sports Science and Clinical Biomechanics |
| Keywords:                     | Strain elastography, supraspinatus tendon, rotator cuff, tendon quality, reliability, tendinopathy                                                                                                                                                                                                                                                                                                                                                                                                      |
|                               |                                                                                                                                                                                                                                                                                                                                                                                                                                                                                                         |

SCHOLARONE™  
Manuscripts

1  
2  
3  
4 **ULTRASONIC STRAIN ELASTOGRAPHY FOR DETECTING ABNORMALITIES**  
5 **WITHIN THE SUPRASPINATUS TENDON: AN INTRA- AND INTERRATER**  
6 **RELIABILITY STUDY**  
7  
8  
9  
10

11 Brage K<sup>1,2</sup>, Hjarbaek J<sup>3</sup>, Kjaer P<sup>1,2</sup>, Ingwersen KG<sup>4</sup>, Juul-Kristensen B<sup>1</sup>

12  
13 <sup>1</sup> Department of Sports Science and Clinical Biomechanics, University of Southern Denmark,  
14 Campusvej 55, 5230 Odense M, DK

15 <sup>2</sup> UCL University College, Niels Bohrs Allé 1, 5230, Odense M, DK

16 <sup>3</sup> Department of Radiology, Odense University Hospital, J. B. Winsløvs Vej 4, 5000 Odense C, DK

17 <sup>4</sup> Research Unit in Physio- and Occupational Therapy, Hospital Lillebaelt, Kabbeltoft 25, 7100  
18 Vejle, DK  
19  
20  
21  
22

23 ***Author information***

24 ***Corresponding Author***

25 Karen Brage, PhD Fellow, Telephone: +45 51787381, fax: 6318 3226, e-mail: [kabr2@ucl.dk](mailto:kabr2@ucl.dk)

26 ***Co-Authors***

27 John Hjarbaek, MD, Telephone: +45 66113333, e-mail: [john.hjarbaek@rsyd.dk](mailto:john.hjarbaek@rsyd.dk)

28 Per Kjær, Professor, Telephone: +45 65504553, e-mail: [pkjaer@health.sdu.dk](mailto:pkjaer@health.sdu.dk)

29 Kim Gordon Ingwersen, PhD., Telephone: +45 65509044, e-mail: [kingwersen@health.sdu.dk](mailto:kingwersen@health.sdu.dk)

30 Birgit Juul-Kristensen, PhD.: Telephone: +45 65503412, e-mail: [bjuul-kristensen@health.sdu.dk](mailto:bjuul-kristensen@health.sdu.dk)  
31  
32  
33

34 **Wordcount**

35 4.224  
36  
37

38 **Trial registration**

39 The study protocol was approved by the Ethical Committee for Region South Denmark (S-  
40 20160115) and reported to the Danish Data Protection Agency (2014-41-3266).  
41  
42  
43  
44  
45  
46  
47  
48  
49  
50  
51  
52  
53  
54  
55  
56  
57  
58  
59  
60

## ABSTRACT

### **Objectives**

Reliability of strain-elastography (SEL) used for supraspinatus pathologies is unclear. Thus the aim was to investigate the reliability of SEL within the supraspinatus tendon.

### **Design**

An intra- and inter-rater reliability study.

### **Setting**

A single center study conducted at the University.

### **Participants**

Twenty participants with shoulder pain and MRI-verified supraspinatus tendinosis and 20 asymptomatic participants (no MRI).

### **Primary and secondary outcome measures**

Raw values (RAW), and ratios (deltoid muscle, DELT; gel pad, GEL, as reference tissues) were calculated and mean values of measurements from three regions of the supraspinatus tendon were reported. Color scale ratings and number of yellow/red lesions from the three areas were furthermore included.

### **Results**

1  
2  
3  
4 Intra-rater reliability showed Intra-Class Correlation Coefficients (ICC) for RAW, DELT and GEL  
5  
6 at 0.97 (Minimal Detectable Change (MDC): 0.28 (6.36% of the mean), 0.89 (MDC: 2.91 (20.37%),  
7  
8 and 0.73 (MDC: 1.61 (58.82%)), respectively. ICC for Inter-rater reliability were 0.89 (MDC: 0.47  
9  
10 (10.53%), 0.78 (MDC: 3.69 (25.51%), and 0.70 (MDC: 1.75 (62.63%)), respectively.

11  
12  
13 For color scale ratings, intra-rater reliability (Linear Weighted kappa, LWk) ranged from 0.76-0.79,  
14  
15 with the inter-rater reliability from 0.71-0.81. For number of lesions intra-rater reliability ranged  
16  
17 from 0.40-0.82, and inter-rater reliability from 0.24-0.67.

## 22 **Conclusions**

23  
24 Intra- and inter-rater reliability was excellent for raw values and for ratios with deltoid as reference  
25  
26 tissue, and good for ratios with gel pad as reference. Reliability of color scale ratings was  
27  
28 substantial to almost perfect, and for number of lesions fair to almost perfect.

29  
30 Although high reliability was found, validity and responsiveness of these elastographic methods  
31  
32 must be established.

## 37 **Strengths and limitations of this study**

- 38  
39  
40  
41  
42 • A standardized procedure for capturing strain elastographic images, to measure pathology in the  
43  
44 supraspinatus tendon, is presented.
- 45  
46 • A specific procedure for grading strain elastographic images is presented.
- 47  
48 • Validity of this elastographic method must be established.
- 49  
50  
51  
52  
53  
54  
55  
56  
57  
58  
59  
60

## INTRODUCTION

Shoulder pain is a common symptom, with a lifetime prevalence in the general population of 6.7-66.7%,<sup>[1]</sup> and subacromial pain syndrome is the second most common cause of pain in the shoulder,<sup>[2]</sup>. Shoulder pain have consequences such as physical limitations, mental problems,<sup>[3]</sup> and absence from work,<sup>[4]</sup>.

Shoulder disorders are evaluated by history taking and physical exam, potentially supplemented with X-ray, conventional ultrasound (US) and/or Magnetic Resonance Imaging (MRI). However, supraspinatus tendon abnormalities are also found in asymptomatic people when using general modalities such as MRI and US,<sup>[5]</sup>. Furthermore, it seems difficult to distinguish pathological changes from healthy tissues by using conventional ultrasound because pathological regions often exhibit the same echogenicity as non-pathological regions,<sup>[6]</sup>.

Strain elastography (SEL) is a relatively new and not yet well-established method, which may assist in early diagnosis, prediction and monitoring of progress in tendon healing,<sup>[7]</sup>.

SEL defines the physical properties of soft tissues through characterization of the differences in stiffness between ‘the regions of interest’ (ROI) and the surrounding tissues,<sup>[8,9]</sup> Conventional US and MRI are developed for visualization of macroscopic changes and not specifically the mechanical tendon properties, why SEL may add further knowledge to conventional shoulder imaging. Since tendon quality is a prognostic factor for rotator cuff repair, information about tendon stiffness could be beneficial for the surgeon,<sup>[10]</sup>.

Tissue deformation using SEL is obtained by uniformly mechanically induced compressions (strain) of the structures under the US transducer, during the US-scan. Through manual compression, the

1  
2  
3  
4 soft tissue deforms differently depending on the inherent stiffness. The degree of deformation can  
5  
6 be interpreted as an estimate of the tissue stiffness,[11].  
7  
8  
9

10  
11 SEL has recently been used in the musculoskeletal area, where the achilles tendon has been the  
12  
13 primary focus,[12]. A few studies have found significant associations between pathology identified  
14  
15 by SEL and MRI in patients with supraspinatus tendinopathy,[13, 14], besides significant  
16  
17 correlations between results from SEL and clinical tests and questionnaires in patients with small  
18  
19 supraspinatus tendon tears,[15]. One study also found SEL to be able to detect increased stiffness in  
20  
21 the supraspinatus tendon- and muscle elasticity with increased muscle contraction in healthy  
22  
23 participants [16]. Although only few studies have been performed, and with different aims,  
24  
25 comparator instruments, procedures, reference tissues and data types, the validity of SEL in the  
26  
27 supraspinatus tendon seems promising,[13-16].  
28  
29  
30  
31  
32  
33

34 However, firstly the reliability of SEL must be proven to be acceptable. In this respect SEL  
35  
36 constitutes several challenges since SEL is a technique with relatively high operator dependency in  
37  
38 terms of the manually applied pressure and afterwards the identification and selection of the  
39  
40 pathological region of interest (ROI).  
41  
42

43 One of only two studies on reliability found the inter-rater reliability of SEL in the supraspinatus  
44  
45 tendon to be almost perfect ( $\kappa = 0.83$ ) with respect to number of focal lesions in 118 patients with  
46  
47 MRI-verified supraspinatus tendinopathy. However, this study did not include a healthy control  
48  
49 group and used only color quantification,[14]. The other study found a high intra-rater reliability  
50  
51 (ICC<sub>1,3</sub> = 0.92-0.99) with respect to ROI, when using an acoustic coupler as reference tissue in a  
52  
53 small sample of 23 healthy participants. Limitations of this study were; not including a group with  
54  
55 pathology, not defining ROI and only using one type of reference tissue (acoustic coupler),[16].  
56  
57  
58  
59  
60

1  
2  
3  
4  
5  
6  
7 To our knowledge no study, investigating the reliability of SEL in the supraspinatus tendon, has  
8 included both patients with a pathological (non-ruptured) supraspinatus tendon and healthy  
9 participants with non-painful shoulders. Furthermore choice of reference tissue and quantification  
10 methods has major impact on results, but no reliability studies have compared these different  
11 approaches.  
12  
13  
14  
15  
16  
17  
18  
19

20 The aim of this study was to test the intra- and inter-rater reliability of SEL within the supraspinatus  
21 tendon in patients and healthy participants, using different reference tissues (deltoid muscle, gel  
22 pad), and different quantification methods (raw data, strain ratios, color scale rating and counting  
23 number of yellow/red lesions).  
24  
25  
26  
27  
28  
29  
30  
31  
32  
33  
34  
35  
36  
37  
38  
39  
40  
41  
42  
43  
44  
45  
46  
47  
48  
49  
50  
51  
52  
53  
54  
55  
56  
57  
58  
59  
60



## MATERIALS AND METHODS

This study is an intra- and inter-rater reliability study of SEL, used on the supraspinatus tendon, reported according to guidelines for reporting reliability and agreement studies (GRRAS),[17].

A 3-phased intra- and inter-rater reliability protocol for diagnostic reliability studies was used,[18].

The protocol included a training phase, (phase one), an overall agreement phase, (phase two), and an actual study phase, (phase three), for securing low clinician dependency and subjectivity, sufficient experience and standardization, and minimization of systematic bias,[18]. In order to continue to the study phase the criteria of at least 80% inter-rater agreement in phase two was used.

Such reliability protocols have previously been used in reliability studies, using ultrasound methods,[19-20].

### Study procedures

Study participants were recruited from August 2016 to December 2017. Symptomatic participants, with an MRI-verified supraspinatus tendinosis (*patients*), were recruited from the Radiology Department at Odense University Hospital within 14 days after MRI examination. Participants with no shoulder symptoms (*healthy participants*), were recruited primarily from the University of Southern Denmark and University College of Lillebaelt, both in Odense. Except for MRI, all procedures were performed at University of Southern Denmark. After inclusion, participants underwent clinical tests (performed by KGI) and filled out questionnaires regarding functional limitations, pain and quality of life. Testing procedures took place once and lasted approximately one hour.

1  
2  
3  
4 All SEL images were captured by the same clinician (KB), while two raters performed the SEL  
5  
6 measurements on the captured images. Rater 1 (KB), radiographer, was thoroughly trained in using  
7  
8 SEL on the shoulder by rater 2 (JH), radiologist, who have more than 20 years' of experience in  
9  
10 clinical musculoskeletal US. In the study phase (phase 3), raters were blinded to each other's results  
11  
12 (data was stored separately), participant's health status (Rater 1 entered the room after clinical tests  
13  
14 and questionnaires were performed, and Rater 2 had no contact with the participants) and MRI  
15  
16 results (ID-numbers were changed after MRI examinations).  
17  
18  
19  
20  
21  
22

23 SEL images were stored for at least 14 days after image capturing until the first image assessment,  
24  
25 to ensure elimination of any memory of pain response during SEL by Rater 1. Further, all SEL  
26  
27 images were stored for additional 14 days before rater 1's second assessment, to ensure elimination  
28  
29 of recalls of SEL results from the first assessment.  
30  
31  
32  
33

34 The study protocol was approved by the Ethical Committee for Region South Denmark (S-  
35  
36 20160115) and reported to the Danish Data Protection Agency (2014-41-3266). All participants had  
37  
38 oral and written information about the study and signed an informed consent form before  
39  
40 participation in this study.  
41  
42  
43  
44  
45

### 46 **Patient and Public Involvement**

47  
48 Patients and public were not involved in this study.  
49  
50  
51

### 52 **Participants**

#### 53 *In- and exclusion criteria*

54  
55 Inclusion criteria for patients and healthy participants were age 18-65.  
56  
57  
58  
59  
60

1  
2  
3  
4 Patients had to have at least one positive out of the following five clinical tests: ‘full can test’,  
5  
6 ‘Jobe’s test’, ‘resisted external rotation test’, Hawkins-Kennedy test ’and ‘Neer’s test’.

7  
8  
9 Furthermore, at least one shoulder had to be diagnosed with tendinosis based on MRI ( $\geq$  grade  
10  
11 1),[21]. If both shoulders were MRI-scanned the most severely affected side was included.

12  
13 Inclusion criteria for the healthy participants were no previously experienced shoulder problems,  
14  
15 and negative signs from all five clinical tests described above. By convenience 50% of participants  
16  
17 had their dominant arm scanned with strain elastography, while the remaining 50% had their non-  
18  
19 dominant arm scanned.  
20  
21

22  
23  
24 Exclusion criteria for both groups were: Tears  $>1/3$  of the vertical height of the supraspinatus  
25  
26 tendon since the stress may be increased on the intact tendon part and calcifications  $>2$  mm (length)  
27  
28 due to acoustic shadowing. Further exclusion criteria were: previous comorbidities (potentially  
29  
30 harmful to the tendon) such as; past/present shoulder fractures, operation and luxation, known  
31  
32 neuromuscular disease, rheumatoid arthritis, cancer, fibromyalgia, spondyloarthropathy and  
33  
34 psychiatric disorders. Pregnancy and inability to read and understand Danish were exclusion criteria  
35  
36 as well.  
37  
38  
39  
40  
41  
42

### 43 **SEL image capturing and measurement**

#### 44 *Apparatus*

45  
46 All measurements were performed with the Logiq S7 using a 15 MHz linear probe (GE Healthcare,  
47  
48 Milwaukee, USA). Manufacturer recommendations for musculoskeletal SEL of the shoulder were  
49  
50 used, including a transducer movement rate of approximately 120 cycles/min, axial smoothing of 2,  
51  
52 lateral smoothing of 3, frequency of 10 and a soft/hard compression of 5.  
53  
54  
55  
56  
57  
58  
59  
60

### *Patient placement*

The SEL was obtained with the patient sitting in the erect position with the arm internally rotated, elbow flexed to 90° and with the dorsal side of the hand placed over the sacrum, as previously used [15]. The probe was placed on the anterior aspect of the acromion in a coronal plane and the images were obtained just laterally to the anterior-lateral corner of the acromion in the longitudinal plane of the supraspinatus tendon (Figure 1).

### *Image capturing*

An image window depth of at least three times the tendon size and an image width covering about three-quarters of the screen were used as recommended for longitudinal SEL,[22]. The tissue was compressed approximately 2-5 mm [9], and a software incorporated quality control (expressed as 1-5 green bars being displayed, with 5 bars being the most acceptable) was used to evaluate the recommended compression size.

For each assessment method (with or without a gel pad covering the transducer (Sonar Aid, 10 mm; Geistlich Pharma, Wolhusen, Switzerland)) 3 sessions of 20 sec. were obtained.

### *Image measurements*

Tendon characteristics were evaluated quantitatively and qualitatively.

Quantitatively, ROIs on the SEL images were drawn over the target area (supraspinatus tendon) and the exact raw strain value (RAW) (0-6; 6 being the hardest tissue) was calculated.

Further, an adjacent reference region (normal tissue, experiencing the same stress as the target region) was drawn. From these two variables the strain ratio (0-60; 60 being the hardest tissue) was calculated,[23]. Two different reference tissues were used; a 1 mm circle region in a soft part of the

1  
2  
3  
4 deltoid/bursal area for the DELT measurement (Figure 2), and a 5 mm circle region in a gel pad  
5  
6 covering the transducer, for the GEL measurement (Figure 3),[13, 24]. The gel pad was used as a  
7  
8 more homogeneous reference tissue  
9

10  
11 For the raw values alone and the strain ratios (strain raw value of supraspinatus tendon (A) to strain  
12  
13 raw value of reference tissue (B) = A/B), a mean of the three measured areas of the supraspinatus  
14  
15 tendon was calculated including data from 5-15 sec. of the 20 sec. cycle as recommended by the  
16  
17 manufacturer.  
18

19  
20 Quantitative measurements were based on examination of 3 entire cine-loops (10 sec) rather than on  
21  
22 single static images,[25], in order to minimize intra-observer variation and avoid transient temporal  
23  
24 fluctuations. Only sequences with the highest image quality (with green bars on the quality  
25  
26 assessment) were used as recommended by the manufacturer.  
27  
28

29  
30  
31 Due to difficulties in defining the most lateral part of the supraspinatus insertion on the humeral  
32  
33 head, a 6.5 mm chord was drawn (in the lateral direction) from the medial part of the insertion on  
34  
35 the humeral head to the lateral part of the tuberculum major. 6.5 mm has previously been estimated  
36  
37 to be the average length of the supraspinatus insertion,[26]. This fix point (end of the line at the  
38  
39 lateral part of the insertion) was used to draw a 23 mm (7.7 x 3) horizontal line in the medial  
40  
41 direction (which has been estimated to be the average length of the tendon) [27], ensuring  
42  
43 agreement of measurement area (Figure 4).  
44  
45  
46  
47  
48  
49

50  
51 Caudal borders for image measurements were bony surfaces (of the humeral head), while cranial  
52  
53 borders were the transition zone between the (superior surface of the supraspinatus) tendon and the  
54  
55 inferior surface of the deltoid muscle and bursa. The bursa area was used as reference tissues (red  
56  
57  
58  
59  
60

1  
2  
3  
4 color in the SEL image). If no red border was seen, an estimated border followed the superior  
5  
6 surface of the tendon.  
7  
8  
9

10  
11 Qualitatively the images were rated using a color scale, from 1-4, according to the following: type  
12  
13 1, < 10% other color than blue (indicating a high tissue stiffness); type 2, 11-25% other color than  
14  
15 blue; type 3, 26-50% other color than blue; or type 4, > 50% other color than blue (indicating a low  
16  
17 tissue stiffness). Furthermore the number of yellow/red lesions was graded as follows; 0 = no  
18  
19 lesions; 1 = one lesion; 2 = two lesions; and 3 = more than two lesions [14]. The qualitative  
20  
21 classifications were all performed on the first high quality image recorded closest to 10 sec. into the  
22  
23 first cycle.  
24  
25  
26  
27  
28

### 29 **Development of SEL method**

30  
31 Based on previous studies,[14, 16, 25, 28-31] a protocol with standardized procedures was  
32  
33 developed for obtaining of SEL characteristics in the Supraspinatus tendon and tested in phase one  
34  
35 on 10 participants.  
36  
37

38  
39 Based on the results from these participants, adjustments concerning type of reference tissues and  
40  
41 color scale criteria were performed. One adjustment was replacement of the subcutaneous fat with  
42  
43 the deltoid muscle as reference tissue, since some participants had too thin subcutaneous fat layer to  
44  
45 measure. Another adjustment was to base the color scale on percentage of colors (replacement of  
46  
47 estimation of the most pronounced color), which made it possible to rate a blue (hard) tendon as  
48  
49 softer if it appeared with yellow/red lesions.  
50  
51

52  
53 In phase two the adjusted protocol was applied on 20 new participants. Overall agreement in phase  
54  
55 two corresponded to >80% with blinded raters. Hereafter, phase three (the actual study phase, n=40)  
56  
57 was initiated based on the final protocol, as described above.  
58  
59  
60

1  
2  
3  
4  
5  
6  
7  
8  
9  
10  
11  
12  
13  
14  
15  
16  
17  
18  
19  
20  
21  
22  
23  
24  
25  
26  
27  
28  
29  
30  
31  
32  
33  
34  
35  
36  
37  
38  
39  
40  
41  
42  
43  
44  
45  
46  
47  
48  
49  
50  
51  
52  
53  
54  
55  
56  
57  
58  
59  
60

## Questionnaires

Participants completed questionnaires, including DASH (Disabilities of the Arm, Shoulder and Hand), for investigating disability of the upper extremities (0-100; 100 being most disabled),[32], VAS (Visual Analogue Scale), for assessing pain level (0-100; 100 being the most painful),[33], EQ-5D-3L, for measuring health-related quality of life and EQ-VAS also for health-related quality of life (0-100; 100 being best imaginable health status) [34]. Demographic data included information on age, gender, and BMI.

## Statistics

SEL data was found to be normally distributed on a histogram with a normality distribution curve. For continuous data (mean of the three measured areas of the supraspinatus tendon) the intra-class correlation coefficient (ICC model 2.3, absolute-agreement, 2-way random, single measures) was calculated to determine intra- and inter-rater reliability,[35]. The ICC, with 95% confidence intervals (95% C.I.), was calculated for RAW, and for strain ratios (DELT and GEL). ICC were interpreted as  $<0.40$  = poor,  $0.40$  to  $0.59$  = fair,  $0.60$ - $0.74$  = good and  $\geq 0.75$  = excellent reliability [36].

Paired students t-tests were completed for statistical comparison of differences between raters (rater 1 (first time) vs. rater 1 (second time), and rater 1 vs. rater 2) using a significance level of 0.05.

Bland and Altman plots with 95% limits of agreement (LOA) were calculated to evaluate systematic differences [37], with the 95% LOA calculated as the mean difference  $\pm 1.96$  x standard deviation of the difference (SD),[38].

1  
2  
3  
4 Standard Error of Measurements (SEM) was calculated using the formula:  $SEM = SD_{\text{mean}}$   
5  
6  $\text{difference} / \sqrt{2}$ , [39] and Minimal Detectable Change 95% ( $MDC_{\text{individual}}$ ) was calculated using the  
7  
8 formula:  $MDC = SEM \times \sqrt{2} \times 1.96$  [40] and the relative MDC was calculated as a percentage of the  
9  
10 average SEL value of Rater 1 and Rater 2.  
11  
12  
13  
14

15  
16 For ordinal data linear weighted Cohen's  $\kappa$  (LW $\kappa$ ) was used to calculate reliability with 95% CIs  
17  
18 for color ratings and number of lesions. LW $\kappa$  was interpreted as  $<0$ =poor, 0.01 to 0.20=slight  
19  
20 agreement, 0.21-0.40=fair agreement, 0.41 to 0.60=moderate agreement, 0.61 to 0.80=substantial  
21  
22 agreement and  $>0.81$ =almost perfect agreement, [41].  
23  
24  
25  
26

27 Statistical analyses were performed in SPSS, version 25.0 (SPSS Inc., Chicago, IL).  
28  
29  
30  
31  
32  
33  
34  
35  
36  
37  
38  
39  
40  
41  
42  
43  
44  
45  
46  
47  
48  
49  
50  
51  
52  
53  
54  
55  
56  
57  
58  
59  
60



## RESULTS

Demographics varied between patients and healthy participants, on most parameters. Patients were, as expected due to the sampling method, older, had a higher BMI, more pain and disability, and reduced quality of life compared with healthy participants (Table 1).

**Table 1**

Demographics (mean; SD (frequencies for EQ-5D)) of patients and healthy participants from the study phase (n = 40).

| Variable                    | Patients (n = 20)  | Healthy participants (n = 20) |
|-----------------------------|--------------------|-------------------------------|
| Age (years)                 | 47.85 (7.63)       | 25.70 (6.10)                  |
| Gender (n (females (%)))    | 14 (70)            | 11 (55)                       |
| BMI                         | 30.49 (6.57)       | 24.94 (2.45)                  |
| VAS rest (0-100)            | 24.60 (20.96)      | 0 (0.00)                      |
| VAS activity (0-100)        | 53.35 (16.62)      | 0 (0.00)                      |
| VAS sleep (0-100)           | 49.60 (18.26)      | 0 (0.00)                      |
| VAS maximum (0-100)         | 78.05 (11.62)      | 0 (0.00)                      |
| DASH (0-100)                | 34.75 (17.48)      | 1.71 (4.21)                   |
| EQ-VAS (0-100)              | 53.24 (38.31)      | 72.90 (36.40)                 |
| <b>EQ-5D-3L</b>             | <b>Frequencies</b> | <b>Frequencies</b>            |
| Mobility problems           | 0                  | 0                             |
| Self-care problems          | 10                 | 1                             |
| Usual activities problems   | 1                  | 0                             |
| Pain/discomfort problems    | 20                 | 1                             |
| Anxiety/depression problems | 5                  | 1                             |

Abbreviations: SD, Standard Deviation; BMI, Body Mass Index; VAS, Visual Analogue Scale; DASH, Disability of the Arm, Shoulder and Hand Questionnaire; EQ-5D-3L, Quality of Life by dimension; EQ-VAS, Quality of Life

The paired t-test showed statistical differences in inter-rater measurements for RAW (Table 2) and in intra-rater measurements for GEL.

**Table 2**

Reliability of strain elastography in the supraspinatus tendon using respectively the deltoid muscle (reference) and a gelpad (reference) and raw data from the study phase (n = 40).

| <b>Continuous scale</b>   | Mean (SD)      | Mean (SD)      | Mean Difference (SD) | P     | LOA         | SEM  | MDC (%)      | ICC (95% C.I.)   |
|---------------------------|----------------|----------------|----------------------|-------|-------------|------|--------------|------------------|
| <b>Mean across tendon</b> |                |                |                      |       |             |      |              |                  |
| <b>Intra-rater</b>        | <b>Rater 1</b> | <b>Rater 1</b> |                      |       |             |      |              |                  |
| RAW                       | 4.40 (0.55)    | 4.36 (0.55)    | 0.04 (0.14)          | 0.09  | -0.24; 0.33 | 0.10 | 0.28 (6.36)  | 0.97 (0.93-0.98) |
| DELT (ratio)              | 14.33 (3.07)   | 14.23 (3.16)   | 0.10 (1.48)          | 0.66  | -2.81; 3.01 | 1.05 | 2.91 (20.37) | 0.89 (0.80-0.94) |
| GEL (ratio)               | 2.87 (1.28)    | 2.59 (1.01)    | 0.28 (0.82)          | 0.04* | -1.33; 1.89 | 0.58 | 1.61 (58.82) | 0.73 (0.54-0.85) |
| <b>Inter-rater</b>        | <b>Rater 1</b> | <b>Rater 2</b> |                      |       |             |      |              |                  |
| RAW                       | 4.40 (0.55)    | 4.53 (0.61)    | -0.13 (0.24)         | 0.00* | -0.60; 0.34 | 0.17 | 0.47 (10.53) | 0.89 (0.75-0.95) |
| DELT (ratio)              | 14.33 (3.07)   | 14.56 (2.60)   | -0.22 (1.88)         | 0.46  | -3.91; 3.46 | 1.33 | 3.69 (25.51) | 0.78 (0.63-0.88) |
| GEL (ratio)               | 2.87 (1.28)    | 2.73 (1.00)    | 0.14 (0.89)          | 0.32  | -1.61; 1.90 | 0.63 | 1.75 (62.63) | 0.70 (0.50-0.83) |

Abbreviations: SD, Standard Deviation; LOA, Limits of Agreement; SEM, Standard Error of Mean; MDC, Minimal Detectable Change; ICC (95% C.I.), Intra-class Correlation Coefficient with 95% confidence intervals; DELT, Reference area in the Deltoid Muscle; GEL, Reference area in the Gel Pad; Raw, Raw Elastography Data; \*, significant difference ( $p \leq 0.05$ ) between first and second measurements for Rater 1.

1  
2  
3  
4 None of the Bland and Altman plots showed funnel effects (increasing difference with  
5  
6 increasing mean size) (Figure 5).  
7  
8

9  
10 For intra-rater and inter-rater reliability, there was 'excellent agreement' using RAW and  
11  
12 DELT (ICC: intra-rater: 0.97, inter-rater: 0.89), (ICC: intra-rater: 0.89, inter-rater: 0.78)  
13  
14 respectively and the reliability was 'good' when using GEL (ICC: intra-rater: 0.73, inter-rater:  
15  
16 0.70). (Table 2).  
17

18  
19 The same pattern, for all measurements, was seen for each of the three measured areas of the  
20  
21 supraspinatus tendon (not shown in tables).  
22  
23

24  
25 For the intra-rater reliability the relative MDC was smallest for RAW (6.36%), larger for  
26  
27 DELT (20.37%) and largest for GEL (58.82%). For inter-rater reliability the same pattern was  
28  
29 seen for MDC, with a minimum of 10.53%, 25.51% and 62.63%, for RAW, DELT and GEL,  
30  
31 respectively.  
32  
33

34  
35 Reliability of using the color scale (performed without gel pad) kappa (LWk) was very  
36  
37 similar, with intra-rater reliability ranging from LWk: 0.76-0.79, representing 'substantial  
38  
39 agreement', and inter-rater agreement ranging from LWk: 0.71-0.81 representing 'substantial  
40  
41 to almost perfect agreement'.  
42  
43

44  
45 For the number of yellow/red lesions, LWk was generally highest for intra-rater ranging from  
46  
47 0.40-0.82 representing 'fair to almost perfect agreement', while for inter-rater reliability LWk  
48  
49 ranged from 0.24-0.67 representing 'fair to substantial agreement' (Table 3).  
50  
51  
52  
53  
54  
55  
56  
57  
58  
59  
60

**Table 3**

Reliability of strain elastography in the supraspinatus tendon using data based on colors, respectively a colorscale and counting no. (number) of lesions from the study phase (n=40)

| Ordinal scale        | Intra-rater         |                   | Inter-rater         |                   |
|----------------------|---------------------|-------------------|---------------------|-------------------|
|                      | Total Agreement (%) | LWκ (95% C.I.)    | Total Agreement (%) | LWκ (95% C.I.)    |
| <b>Colorscale</b>    |                     |                   |                     |                   |
| Medial tendon 1/3    | 80                  | 0.76 (0.64-0.89)  | 80                  | 0.77 (0.63-0.91)  |
| Middle tendon 1/3    | 82.5                | 0.77 (0.65-0.88)  | 76                  | 0.71 (0.58-0.83)  |
| Lateral tendon 1/3   | 85                  | 0.79 (0.65-0.94)  | 87.5                | 0.81 (0.65-0.97)  |
| <b>Lesions (no.)</b> |                     |                   |                     |                   |
| Medial tendon 1/3    | 87.5                | 0.82 (0.69-0.95)  | 82.5                | 0.67 (0.53-0.80)  |
| Middle tendon 1/3    | 90                  | 0.75 (0.51-1.00)  | 87.5                | 0.63 (0.30-0.96)  |
| Lateral tendon 1/3   | 87.5                | 0.40 (-0.16-0.97) | 90                  | 0.24 (-0.14-0.62) |

Abbreviations: LWκ (95% C.I.), Linear Weighted κ with 95% confidence intervals

1  
2  
3  
4 For the medial and middle tendon part LWk was 'substantial to almost perfect' for intra-rater  
5  
6 (LWk 0.75-0.82) and 'substantial' for inter-rater (LWk 0.63-0.67) reliability, while for the  
7  
8 lateral tendon part LWk was low, corresponding to only 0.40 and 0.24 for intra-rater and  
9  
10 inter-rater reliability, respectively, representing 'fair agreement'.  
11  
12  
13  
14  
15  
16  
17  
18  
19  
20  
21  
22  
23  
24  
25  
26  
27  
28  
29  
30  
31  
32  
33  
34  
35  
36  
37  
38  
39  
40  
41  
42  
43  
44  
45  
46  
47  
48  
49  
50  
51  
52  
53  
54  
55  
56  
57  
58  
59  
60

For peer review only

## DISCUSSION

The reliability of the results from SEL was ‘excellent’ when using the raw data and the deltoid muscle as reference tissue. When using a gel pad as reference the reliability of the results was ‘good’. Furthermore, the relative MDC (% of mean) was smallest for RAW and largest for GEL.

When using the color scale grading LWk represented ‘substantial agreement’ to ‘substantial to almost perfect agreement’. For the number of yellow/red lesions, LWK was highest for intra-rater reliability, in the medial and middle tendon part LWk was ‘substantial to almost perfect’, while for the lateral tendon part LWk was low, corresponding to only ‘fair’ agreement’.

### Strain Ratios and Raw data

The ROI’s with raw SEL data (no reference tissue) resulted in the highest reliability in intra- as well as inter-rater reliability. Although there was a significant difference between Rater 1 and Rater 2 for RAW, this difference was less than the MDC and is ascribed as measurement error.

To our knowledge no study has previously presented raw SEL data, which hampers comparison with other studies. Using raw data has limitations, since there is, in comparison with using ratios, no possibilities to adjust for different transducer pressures. On the other hand, the advantage is that it gives a more quantitative estimate than when using visual inspections, as for example in the color scale, or uncertainties from selection of reference area.

1  
2  
3  
4 In the present study only one rater captured the images (using almost same pressure) and two  
5  
6 raters traced and measured the areas. If more than one rater were to capture the images a  
7  
8 lower reliability may be expected, due to potentially different transducer pressure.  
9

10  
11  
12  
13 Different reference tissues in SEL measurements of the musculoskeletal area make it difficult  
14  
15 to compare data across studies. The reference tissues previously used for calculating strain  
16  
17 ratios in the achilles- and supraspinatus tendon areas have included bone,[15], fat,[13, 25, 31,  
18  
19 42, 43] and gel pad/acoustic coupler,[13, 16, 44]. Using bone as reference value has  
20  
21 limitations, since ultrasound cannot penetrate bone material, meaning that data coming from  
22  
23 this region is artefacts.  
24  
25

26  
27 In addition, strain ratios may in different studies be based on different equations, placing the  
28  
29 ROIs of the tendon in the denominator,[13, 45] or, as in the present study, in the  
30  
31 numerator,[25, 31].  
32  
33

34 Due to thin subcutaneous fat tissue area in some participants the reference tissue was  
35  
36 replaced, after phase one, into muscle tissue (deltoid muscle) and the gel pad (artificial fat  
37  
38 tissue).  
39

40  
41 When using the deltoid muscle tissue (DELT) as reference, reliability was found to be  
42  
43 excellent (both intra- and inter-rater). Muscle tissue increases stiffness significantly after  
44  
45 exercise and muscle contractions,[16, 24] and therefore limitations are recognized, when  
46  
47 using this tissue as reference for investigating e.g. tendon tissue response to muscle  
48  
49 contractions.  
50  
51

52 However no previous study of SEL on the supraspinatus tendon has used muscle tissue as  
53  
54 reference for the calculated strain ratios.  
55  
56  
57  
58  
59  
60

1  
2  
3  
4 The present study found a high MDC for GEL (large measurement error) but a good  
5  
6 reliability (ICC 0.70-0.73), in line with previous studies. One study, using the Kager's fat pad  
7  
8 (fat deposit within the Kager triangle anterior to the achilles tendon), as reference tissue in the  
9  
10 achilles tendon, also found good to excellent intra- and inter-tester reliability (ICC: 0.51-0.78)  
11  
12 in the longitudinal plane, however, with much lower reliability (ICC: 0.41-0.45) in the axial  
13  
14 plane,[25]. Unfortunately MDC was not reported.  
15  
16

17  
18 The present data with the gel pad are also in line with a study using an acoustic coupler as  
19  
20 reference tissue in the supraspinatus tendon,[16], where excellent intra-rater reliability was  
21  
22 shown, as also confirmed for the achilles tendon,[44]. An acoustic coupler is similar to the gel  
23  
24 pad and may be acceptable, but ideally, the reference area should be in the same depth as the  
25  
26 ROI (here the supraspinatus tendon). As the gel pad is not located closely to the tendon, the  
27  
28 ROIs from the GEL pad will not be subjected to the same amount of tissue pressure as the  
29  
30 tendon, which may affect reliability and validity.  
31  
32

33  
34 The present study found the lowest reliability (but still graded 'good') when using GEL which  
35  
36 may be caused by difficulties due to lower image quality, because of increased depth. Also a  
37  
38 statistical significant intra-rater difference was seen, but as this difference was below the  
39  
40 MDC it can be ascribed as measurement error.  
41  
42  
43  
44

### 45 **Color Ratings**

46  
47 The present study found a high reliability ('substantiel' to 'almost perfect') when grading the  
48  
49 ROIs of SEL images according to a 4-level color scale where blue tissue indicates hard tissue  
50  
51 and red tissue indicates soft tissue. This is in line with a previous study on the achilles tendon  
52  
53 using color scales of 5-levels (1=blue (hardest tissue), 2=light blue, 3=green, 4=yellow, 5=red  
54  
55  
56  
57  
58  
59  
60



1  
2  
3  
4 (softest tissue)), where good to excellent inter-rater ( $\kappa = 0.897$ ) and intra-rater ( $\kappa = 1$ )  
5  
6 reliability was found,[30].  
7  
8  
9

10  
11 Alternative types of color scales have been used in the musculoskeletal area, primarily for the  
12  
13 achilles  
14  
15 tendon, with categorization of the achilles tendon into a 2-level category scale (green/blue vs.  
16  
17 red),[25] and a 3-level category (blue/yellow/red),[22, 29]. The current study has used the  
18  
19 same colors for defining hard tissue (blue), and for soft tissue (red), but with a 4-level  
20  
21 category scale, and with more precise criteria for the different levels which was found  
22  
23 necessary due to the mixture of colors in the supraspinatus tendon observed in phase 1.  
24  
25  
26  
27  
28

29  
30 In the present study LWk in the medial and the middle tendon part was 'substantial to almost  
31  
32 perfect' when counting the number of yellow/red lesions in both intra and inter-rater  
33  
34 reliability. Even though the total agreement was high also in the lateral third of the tendon,  
35  
36 LWk was relatively low compared to the medial and the middle part of the tendon. The reason  
37  
38 may be due to the low presence of lesions in the lateral part, corresponding to only 10 % of  
39  
40 the participants presenting with lesions in the lateral 1/3 of the tendon which can lead to the  
41  
42 'Kappa Paradox',[46]. Another explanation is that since the pressure is put vertically on the  
43  
44 medial part of the tendon, the lateral part will have experienced a smaller degree of stress.  
45  
46  
47 The high reliability of number of focal lesions (LwK intra-rater reliability: 87.5-90, LwK  
48  
49 inter-rater reliability: 82.5-90) is in line with a previous study on the supraspinatus tendon  
50  
51 where an almost perfect reliability ( $k = 0.83$ ) was found,[14].  
52  
53  
54  
55  
56  
57  
58  
59  
60

1  
2  
3  
4 The present methods of using color grading and lesion counts for assessing tendon stiffness in  
5  
6 the supraspinatus tendon showed high reliability. These methods are feasible for use in  
7  
8 clinical practice as they can be performed quickly, but when more than one clinician is  
9  
10 performing the SEL, the method can not adjust for potentially different transducer pressures.  
11  
12  
13  
14

### 15 16 **Limitations**

17  
18 Manual compression may affect reliability, especially when using raw data, color grading and  
19  
20 counting yellow/red lesions. To partly counteract for this, a quality bar was used providing  
21  
22 instant feedback on the uniformity of the transducer pressure. Further, also reference tissues  
23  
24 (deltoid muscle and gel pad) with calculation of strain ratios were used, thereby making a  
25  
26 comparison possible between the methods.  
27

28  
29 Furthermore, as mentioned, SEL is highly operator dependent, why the same (and only one)  
30  
31 trained operator captured the present images, thereby further decreasing risk of bias, but this  
32  
33 limits the external validity of the results.  
34

35  
36 In addition, age was not blinded for and as earlier reported; tendons get softer with age,[47].  
37  
38 Therefore the current blinding of examiner results and health status may not have been  
39  
40 sufficient.  
41  
42  
43  
44

### 45 46 **Strengths**

47  
48 The strength of this study is the design, incorporating a stepwise and standardized procedure  
49  
50 for reliability which minimizes bias and increases reliability,[18]. Furthermore both patients  
51  
52 and healthy participants were enrolled.  
53

54  
55 To enhance standardization all SEL ROIs were measured at a fixed point just laterally from  
56  
57 the anterior-lateral corner of the acromion in the longitudinal plane of the supraspinatus  
58  
59  
60

1  
2  
3  
4 tendon [20]. In addition the reliability was estimated by using three different quantitative  
5  
6 methods (RAW, DELT and GEL), as well as two different qualitative methods (color and  
7  
8 number of yellow/red focal lesions).  
9  
10  
11  
12  
13  
14  
15  
16  
17  
18  
19  
20  
21  
22  
23  
24  
25  
26  
27  
28  
29  
30  
31  
32  
33  
34  
35  
36  
37  
38  
39  
40  
41  
42  
43  
44  
45  
46  
47  
48  
49  
50  
51  
52  
53  
54  
55  
56  
57  
58  
59  
60

For peer review only

## CONCLUSION

Intra- and inter-rater reliability were excellent using raw values and ratios with deltoid as reference tissue, and good when using gel pad as reference.

Reliability of color scale ratings, were substantial to almost perfect and number of lesions were fair to almost perfect.

Although high reliability was found, validity and responsiveness of these elastographic methods must be established.

**Contributorship statement**

KB, JH, PK, KGI and BJ-K conceived and designed the study protocol. KB and BJ-K procured the project funding. KB, JH, PK, and BJ-K developed and standardised the ultrasound procedure. JH, KB and KGI recruited participants.

KB was the project coordinator and captured the strain elastography images. KGI performed the physical tests. KB and JH rated the images. KB and BJ-K planned and coordinated the statistical analyses. KB performed the statistical analyses. KB drafted the manuscript, and JH, PK, KGI and BJ-K contributed to the manuscript. All authors read and approved the final manuscript. KB is the guarantor.

**Competing interests**

The authors declare no conflicts of interest.

**Funding**

This work was supported by South Denmark Region (14/38969, 15/24799), The Danish Rheumatism Association (R150-A4296) and Danish Council of Radiographers (no grant number).

**Data sharing statement**

No additional data is available.

## REFERENCES

1. Luime JJ, Koes BW, Hendriksen IJ, Burdorf A, Verhagen AP, Miedema HS et al. Prevalence and incidence of shoulder pain in the general population; a systematic review. *Scand J Rheumatol* 2004;33:73-81.
2. Singh SG, Sumit.; Mohammad, F.; Kumar, S.; Kumar, D.; Kumar, S. Prevalence of shoulder disorders in tertiary care centre. *J Res Med Sci* 2015;3:917-920.
3. Nyman PP, K.; Panula, H.; Mälkiä, E. Patients' experience of shoulder problems prior to and following intervention. *Physiother Theory Pract* 2012;28:221-231.
4. Virta L, Joranger P, Brox JI, Eriksson R. Costs of shoulder pain and resource use in primary health care: a cost-of-illness study in Sweden. *BMC Musculoskelet Disord* 2012;13:17
5. Teunis T, Lubberts B, Reilly BT, Ring D. A systematic review and pooled analysis of the prevalence of rotator cuff disease with increasing age. *J Shoulder Elbow Surg / A*2014;23:1913-1921.
6. Klauser AS, Faschingbauer R, Jaschke WR. Is sonoelastography of value in assessing tendons? *Semin Musculoskelet Radiol* 2010;14:323-333.
7. Prado-Costa R, Rebelo J, Monteiro-Barroso J, Preto AS. Ultrasound elastography: compression elastography and shear-wave elastography in the assessment of tendon injury. *Insights imaging* 2018.
8. Dietrich CF, Barr RG, Farrokh A, Dighe M, Hocke M, Jenssen C et al. Strain Elastography - How To Do It? *Ultrasound Int Open* 2017;3:E137-e149.
9. Garra BS. Elastography: history, principles, and technique comparison. *Abdom Imaging* 2015;40:680-697.
10. Chung SW, Kim JY, Yoon JP, Lyu SH, Rhee SM, Oh SB. Arthroscopic repair of partial-thickness and small full-thickness rotator cuff tears: tendon quality as a prognostic factor for repair integrity. *Am J Sports Med* 2015;43:588-596.
11. Bamber J, Cosgrove D, Dietrich CF, Fromageau J, Bojunga J, Calliada F et al. EFSUMB guidelines and recommendations on the clinical use of ultrasound elastography. Part 1: Basic principles and technology. *Ultraschall Med* 2013;34:169-184.
12. Fusini F, Langella F, Busilacchi A, Tudisco C, Gigante A, Masse A et al. Real-time sonoelastography: principles and clinical applications in tendon disorders. A systematic review. *Muscles Ligaments Tendons J* 2017;7:467-477.

13. Lee SU, Joo SY, Kim SK, Lee SH, Park SR, Jeong C. Real-time sonoelastography in the diagnosis of rotator cuff tendinopathy. *J Shoulder Elbow Surg* 2016;25:723-729.
14. Seo JB, Yoo JS, Ryu JW. Sonoelastography findings of supraspinatus tendon in rotator cuff tendinopathy without tear: comparison with magnetic resonance images and conventional ultrasonography. *J Ultrasound* 2015;18:143-149.
15. Tudisco C, Bisicchia S, Stefanini M, Antonicoli M, Masala S, Simonetti G. Tendon quality in small unilateral supraspinatus tendon tears. Real-time sonoelastography correlates with clinical findings. *Knee Surg Sports Traumatol Arthrosc* 2013;23(2):393-8.
16. Muraki T, Ishikawa H, Morise S, Yamamoto N, Sano H, Itoi E et al. Ultrasound elastography-based assessment of the elasticity of the supraspinatus muscle and tendon during muscle contraction. *J Shoulder Elbow Surg* 2015;24:120-126.
17. Kottner J, Audige L, Brorson S, Donner A, Gajewski BJ, Hrobjartsson A et al. Guidelines for Reporting Reliability and Agreement Studies (GRRAS) were proposed. *J Clin Epidemiol* 2011;64:96-106.
18. Patijn JV, Beek JV, Blomberg S, et al. Reproducibility and Validity Studies of Diagnostic Procedures in Manual/Musculoskeletal Medicine; 2004. In: Patijn J, ed. International Federation for manual/musculoskeletal medicine. 2004:3-35.
19. Hougs Kjaer BPM, Ellegaard KPP, Wieland IP, Warming SPP, Juul-Kristensen BPP. Intra-rater and inter-rater reliability of the standardized ultrasound protocol for assessing subacromial structures. *Physiother Theory Pract* 2017;33:398-409.
20. Ingwersen KG, Hjarbæk J, Eshøj H, Larsen CM, Vobbe JW, Juul-Kristensen B. Ultrasound assessment for grading structural tendon changes in supraspinatus tendinopathy: an inter-rater reliability study. *B M J Open* 2016;6. 10.1136/bmjopen-2016-011746.
21. Sein ML, Walton J, Linklater J, Harris C, Dugal T, Appleyard R et al. Reliability of MRI assessment of supraspinatus tendinopathy. *Br J Sports Med* 2007;41:e9. doi:10.1136/bjsm.2006.034421
22. De Zordo T, Fink C, Feuchtner GM, Smekal V, Reindl M, Klauser AS. Real-time sonoelastography findings in healthy Achilles tendons. *AJR* 2009;193:W134-138.
23. Cosgrove D, Piscaglia F, Bamber J, Bojunga J, Correias JM, Gilja OH et al. EFSUMB guidelines and recommendations on the clinical use of ultrasound elastography. Part 2: Clinical applications. *Ultraschall Med* 2013;34:238-253.
24. Niitsu M, Michizaki A, Endo A, Takei H, Yanagisawa O. Muscle hardness measurement by using ultrasound elastography: a feasibility study. *Acta Radiol* 211;52:99-105.

- 1
- 2
- 3
- 4
- 5
- 6 25. Drakonaki EE, Allen GM, Wilson DJ. Real-time ultrasound elastography of the normal
- 7 Achilles tendon: reproducibility and pattern description. *Clin Radiol* 2009;64:1196-
- 8 1202.
- 9
- 10 26. Lumsdaine W, Smith A, Walker RG, Benz D, Mohammed KD, Stewart F. Morphology
- 11 of the humeral insertion of the supraspinatus and infraspinatus tendons: Application to
- 12 rotator cuff repair. *Clin Anat* 2015;28:767-773.
- 13
- 14 27. Curtis AS, Burbank KM, Tierney JJ, Scheller AD, Curran AR. The insertional footprint
- 15 of the rotator cuff: an anatomic study. *Arthroscopy* 2006;22:609.e601.
- 16
- 17 28. De Zordo T, Lill SR, Fink C, Feuchtner GM, Jaschke W, Bellmann-Weiler R et al. Real-
- 18 time sonoelastography of lateral epicondylitis: comparison of findings between patients
- 19 and healthy volunteers. *AJR* 2009;193:180-185.
- 20
- 21 29. Klauser AS, Miyamoto H, Tamegger M, Faschingbauer R, Moriggl B, Klima G et al.
- 22 Achilles tendon assessed with sonoelastography: histologic agreement. *Radiology*
- 23 2013;267:837-842.
- 24
- 25 30. Sconfienza LM, Silvestri E, Cimmino MA. Sonoelastography in the evaluation of
- 26 painful Achilles tendon in amateur athletes. *Clin. Exp. Rheumatol* 2010;28:373-378.
- 27
- 28 31. Turan A, Tufan A, Mercan R, Teber MA, Tezcan ME, Bitik B et al. Real-time
- 29 sonoelastography of Achilles tendon in patients with ankylosing spondylitis. *Skeletal*
- 30 *Radiol* 2013;42:1113-1118.
- 31
- 32 32. Kitis A, Celik E, Aslan UB, Zencir M. DASH questionnaire for the analysis of
- 33 musculoskeletal symptoms in industry workers: a validity and reliability study. *Appl*
- 34 *Ergon* 2009;40:251-255.
- 35
- 36 33. Boonstra AM, Schiphorst Preuper HR, Reneman MF, Posthumus JB, Stewart RE.
- 37 Reliability and validity of the visual analogue scale for disability in patients with chronic
- 38 musculoskeletal pain. *Int J Rehabil Res* 2008;31:165-169.
- 39
- 40 34. Norman R, Cronin P, Viney R, King M, Street D, Ratcliffe J. International comparisons
- 41 in valuing EQ-5D health states: a review and analysis. *Value Health* 2009;12:1194-
- 42 1200.
- 43
- 44 35. Shrout PE, Fleiss JL. Intraclass correlations: uses in assessing rater reliability. *Psychol*
- 45 *Bull* 1979;86:420-428.
- 46
- 47 36. Cicchetti D. Guidelines, Criteria, and Rules of Thumb for Evaluating Normed and
- 48 Standardized Assessment Instrument in Psychology. *Psychol Assess* 1994;6:284-290.
- 49
- 50 37. Bland JM, Altman DG. Statistical methods for assessing agreement between two
- 51 methods of clinical measurement. *Lancet* 1986;1:307-310.
- 52
- 53
- 54
- 55
- 56
- 57
- 58
- 59
- 60



- 1
- 2
- 3
- 4
- 5
- 6 38. Ottenbacher KJ, Stull GA. The analysis and interpretation of method comparison studies
- 7 in rehabilitation research. *Am J Phys Med Rehabil* 1993;72:266-271.
- 8
- 9 39. de Vet HC, Terwee CB, Knol DL, Bouter LM. When to use agreement versus reliability
- 10 measures. *J Clin Epidemiol* 2006;59:1033-1039.
- 11
- 12 40. deVet HCW, Terwee, Caroline B.; Knol, Dirk L.; Mokkink, Lidwine B. .
- 13 *Measurements in Medicine - a practical guide*. New York, USA: Cambridge University
- 14 Press; 2011.
- 15
- 16
- 17 41. Landis RJK, G.G. The Measurement of Observer Agreement for Categorical Data.
- 18 *Biometrics* 1977;33:159–174.
- 19
- 20 42. Busilacchi A, Olivieri M, Ulisse S, Gesuita R, Skrami E, Lording T et al. Real-time
- 21 sonoelastography as novel follow-up method in Achilles tendon surgery. *Knee Surg*
- 22 *Sports Traumatol Arthrosc* 2014.
- 23
- 24
- 25 43. Ooi CC, Schneider ME, Malliaras P, Chadwick M, Connell DA. Diagnostic
- 26 performance of axial-strain sonoelastography in confirming clinically diagnosed
- 27 Achilles tendinopathy: comparison with B-mode ultrasound and color Doppler imaging.
- 28 *Ultrasound Med Biol* 2015;41:15-25.
- 29
- 30
- 31 44. Yamamoto Y, Yamaguchi S, Sasho T, Fukawa T, Akatsu Y, Nagashima K et al.
- 32 Quantitative Ultrasound Elastography With an Acoustic Coupler for Achilles Tendon
- 33 Elasticity: Measurement Repeatability and Normative Values. *J Ultrasound Med*
- 34 *2016;35:159-166*.
- 35
- 36
- 37 45. Akkaya S, Akkaya N, Agladioglu K, Gungor HR, Ok N, Ozcakar L. Real-time
- 38 elastography of patellar tendon in patients with auto-graft bone-tendon-bone anterior
- 39 cruciate ligament reconstruction. *Arch Orthop Trauma Surg* 2016;136:837-842.
- 40
- 41 46. Feinstein AR, Cicchetti DV. High agreement but low kappa: I. The problems of two
- 42 paradoxes. *J Clin Epidemiol* 1990;43:543-549.
- 43
- 44
- 45 47. Hsiao MY, Chen YC, Lin CY, Chen WS, Wang TG. Reduced patellar tendon elasticity
- 46 with aging: In vivo assessment by shear wave elastography. *Ultrasound Med Biol*
- 47 *2015;41:2899-2905*.
- 48
- 49
- 50
- 51
- 52
- 53
- 54
- 55
- 56
- 57
- 58
- 59
- 60

## Figure legends

### Figure 1

With the arm located behind the back and the elbow flexed 90° with the palm facing towards the posterior direction, the probe is placed just laterally from the anterior-lateral corner of the acromion in the longitudinal plane of the supraspinatus tendon.

### Figure 2

Left side: For measuring elastography characteristics of the supraspinatus tendon, the tendon was split into 3 parts (3x7.7mm), illustrated by the areas of blue, red and green colors. This division was based on a line from the lateral tendon insertion (tuberculum majus) to the medial tendon insertion part, corresponding to 6.5 mm, and from there a line of 23 mm to the medial tendon part with the end point (medial part) being perpendicular to the superior surface of the tendon.

The yellow circle in the soft part of the deltoid muscle is used as a reference.

Right side: The three measurements areas (ROI's) and one reference area with elastography characteristics (raw data) during the time of measurement.

### Figure 3

Left side: Gel pad (mounted on the transducer with a condom used as the other reference area, yellow circle). Right side: The corresponding elastography image/measurements.

1  
2  
3  
4 Figure 4  
5

6 A 6.5 mm chord was drawn (in the lateral direction) from the medial part of the insertion on  
7 the humeral head to the lateral part of the tuberculum major. This fix point (end of the line at  
8 the lateral part of the insertion) was used to draw a 23 mm (7.7 x 3) horizontal line in the  
9 medial direction ensuring agreement of measuring area.  
10  
11  
12  
13  
14  
15  
16  
17

18 Figure 5  
19

20 Bland-Altman plots with 95% Limits of Agreement for measurements, using respectively raw  
21 data, the deltoid muscle and a gel pad as reference areas. Values are based on the mean of the  
22 three measured parts across the supraspinatus tendon.  
23  
24  
25  
26  
27  
28  
29  
30  
31  
32  
33  
34  
35  
36  
37  
38  
39  
40  
41  
42  
43  
44  
45  
46  
47  
48  
49  
50  
51  
52  
53  
54  
55  
56  
57  
58  
59  
60

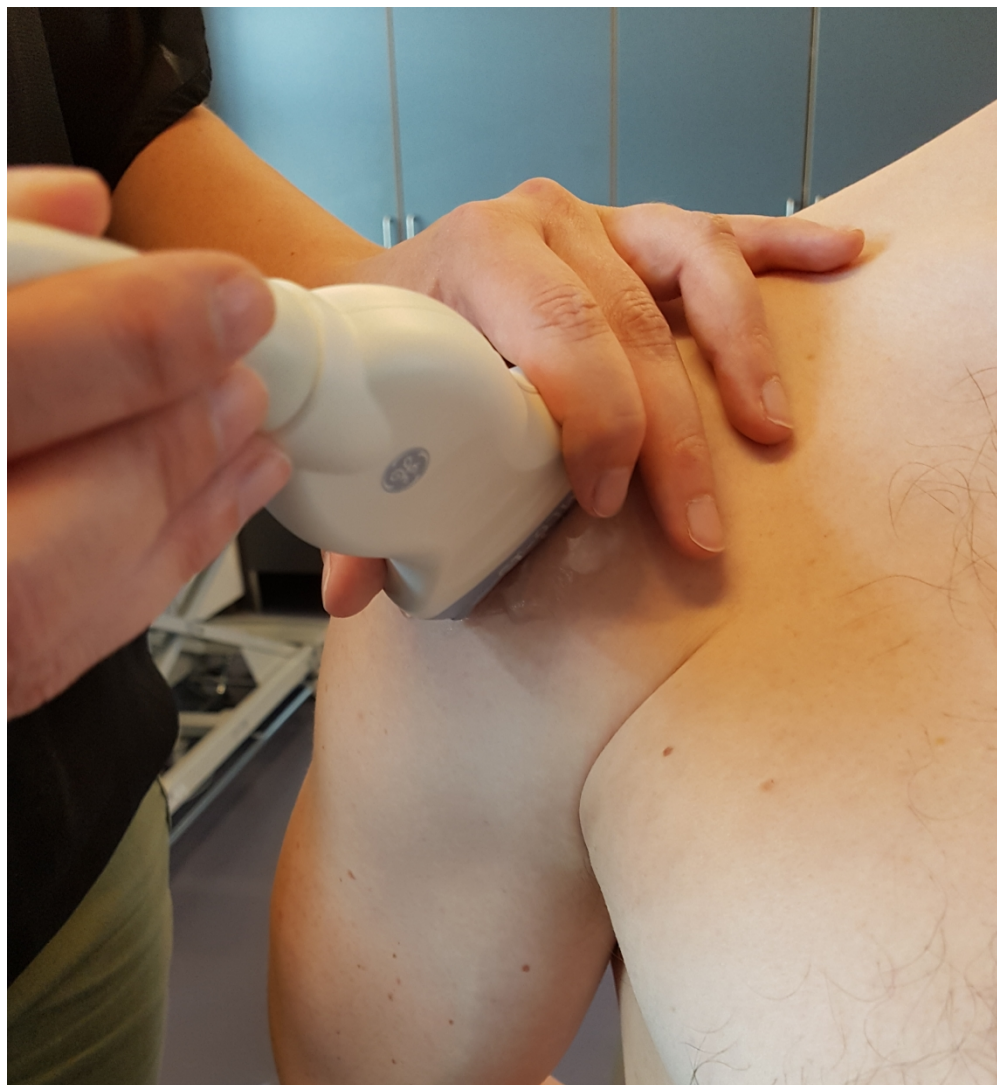

With the arm located behind the back and the elbow flexed 90° with the palm facing towards the posterior direction, the probe is placed just laterally from the anterior-lateral corner of the acromion in the longitudinal plane of the supraspinatus tendon.

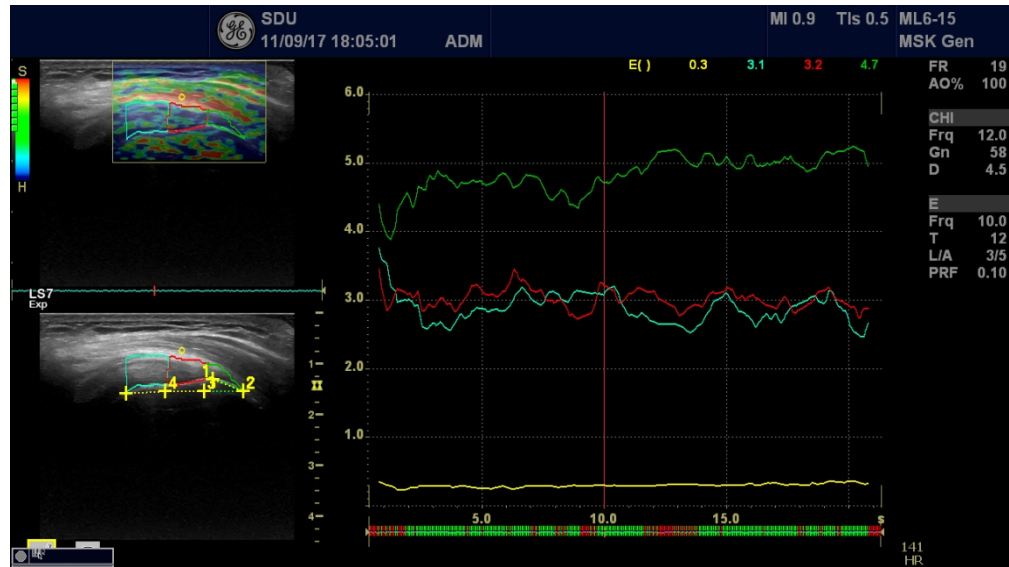

Left side: For measuring elastography characteristics of the supraspinatus tendon, the tendon was split into 3 parts (3x7.7mm), illustrated by the areas of blue, red and green colors. This division was based on a line from the lateral tendon insertion (tuberculum majus) to the medial tendon insertion part, corresponding to 6.5 mm, and from there a line of 23 mm to the medial tendon part with the end point (medial part) being perpendicular to the superior surface of the tendon.

The yellow circle in the soft part of the deltoid muscle is used as a reference.

Right side: The three measurements areas (ROI's) and one reference area with elastography characteristics (raw data) during the time of measurement.

451x254mm (72 x 72 DPI)

1  
2  
3  
4  
5  
6  
7  
8  
9  
10  
11  
12  
13  
14  
15  
16  
17  
18  
19  
20  
21  
22  
23  
24  
25  
26  
27  
28  
29  
30  
31  
32  
33  
34  
35  
36  
37  
38  
39  
40  
41  
42  
43  
44  
45  
46  
47  
48  
49  
50  
51  
52  
53  
54  
55  
56  
57  
58  
59  
60

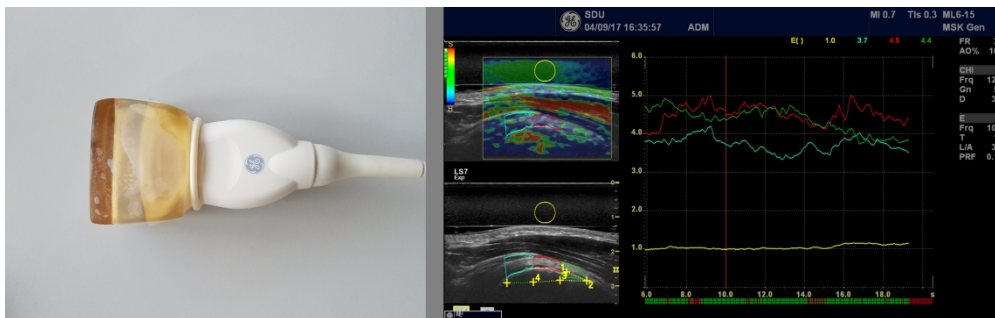

Left side: Gel pad (mounted on the transducer with a condom used as the other reference area, yellow circle). Right side: The corresponding elastography image/measurements.

1  
2  
3  
4  
5  
6  
7  
8  
9  
10  
11  
12  
13  
14  
15  
16  
17  
18  
19  
20  
21  
22  
23  
24  
25  
26  
27  
28  
29  
30  
31  
32  
33  
34  
35  
36  
37  
38  
39  
40  
41  
42  
43  
44  
45  
46  
47  
48  
49  
50  
51  
52  
53  
54  
55  
56  
57  
58  
59  
60

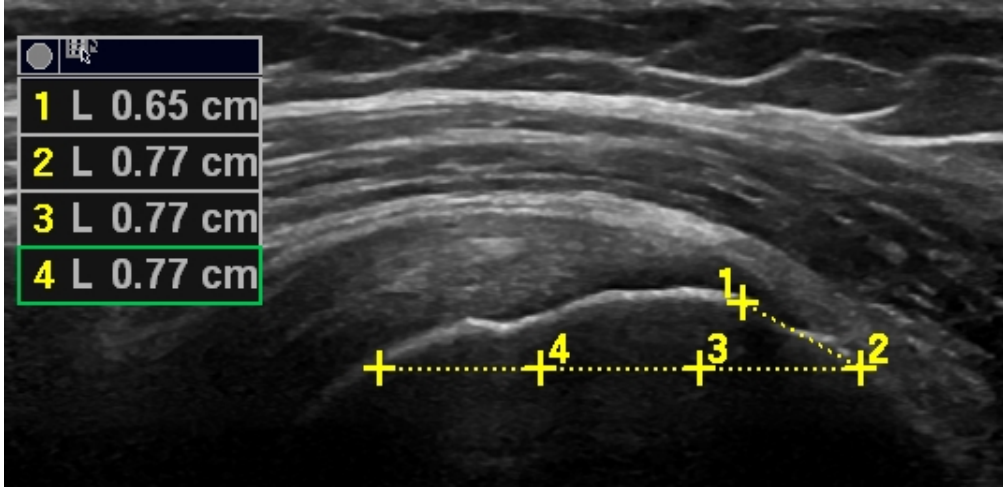

A 6.5 mm chord was drawn (in the lateral direction) from the medial part of the insertion on the humeral head to the lateral part of the tuberculum major. This fix point (end of the line at the lateral part of the insertion) was used to draw a 23 mm (7.7 x 3) horizontal line in the medial direction ensuring agreement of measuring area.

1  
2  
3  
4  
5  
6  
7  
8  
9  
10  
11  
12  
13  
14  
15  
16  
17  
18  
19  
20  
21  
22  
23  
24  
25  
26  
27  
28  
29  
30  
31  
32  
33  
34  
35  
36  
37  
38  
39  
40  
41  
42  
43  
44  
45  
46  
47  
48  
49  
50  
51  
52  
53  
54  
55  
56  
57  
58  
59  
60

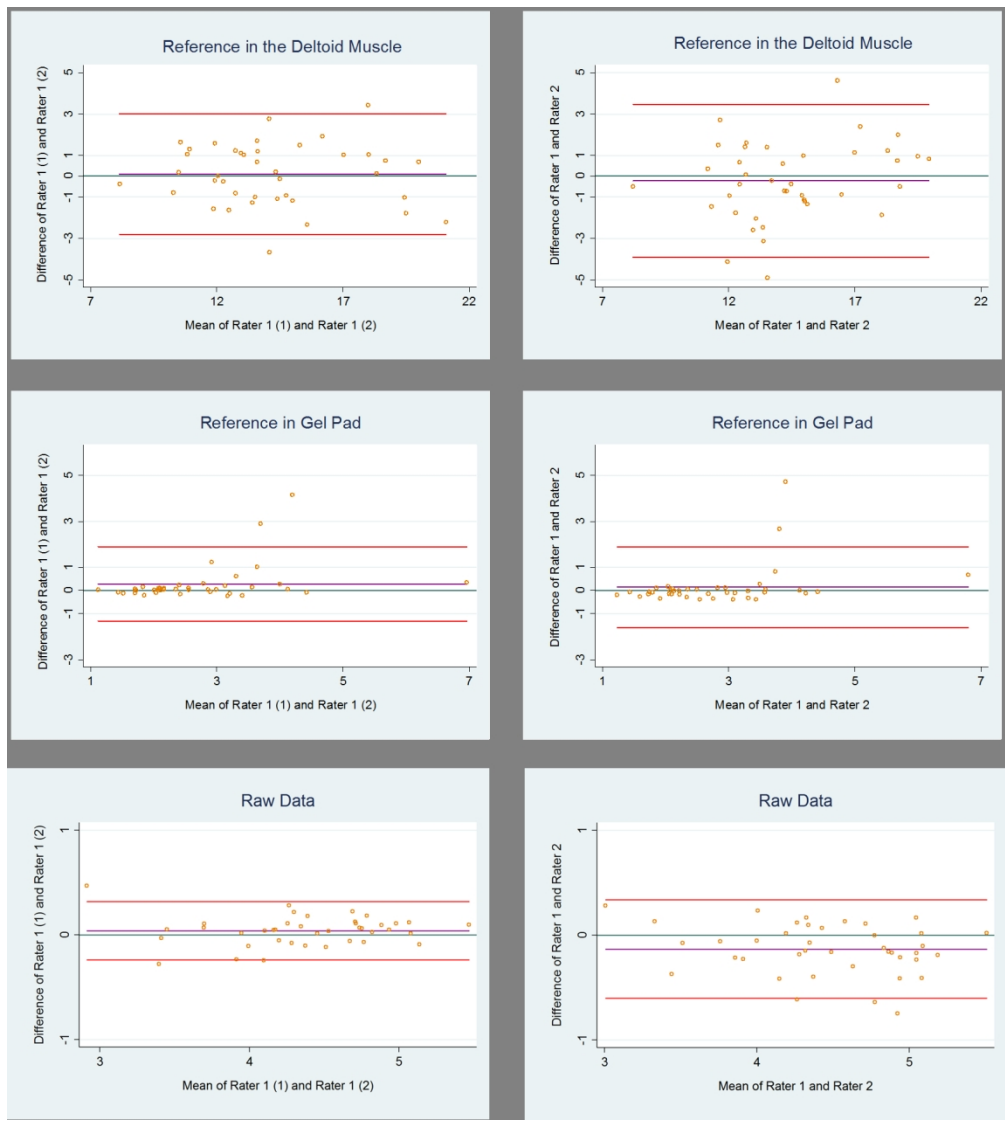

Bland-Altman plots with 95% Limits of Agreement for measurements, using respectively raw data, the deltoid muscle and a gel pad as reference areas. Values are based on the mean of the three measured parts across the supraspinatus tendon.



# BMJ Open

## ULTRASONIC STRAIN ELASTOGRAPHY FOR DETECTING ABNORMALITIES IN THE SUPRASPINATUS TENDON: AN INTRA- AND INTER-RATER RELIABILITY STUDY

|                                 |                                                                                                                                                                                                                                                                                                                                                                                                                                                                                                         |
|---------------------------------|---------------------------------------------------------------------------------------------------------------------------------------------------------------------------------------------------------------------------------------------------------------------------------------------------------------------------------------------------------------------------------------------------------------------------------------------------------------------------------------------------------|
| Journal:                        | <i>BMJ Open</i>                                                                                                                                                                                                                                                                                                                                                                                                                                                                                         |
| Manuscript ID                   | bmjopen-2018-027725.R1                                                                                                                                                                                                                                                                                                                                                                                                                                                                                  |
| Article Type:                   | Research                                                                                                                                                                                                                                                                                                                                                                                                                                                                                                |
| Date Submitted by the Author:   | 28-Feb-2019                                                                                                                                                                                                                                                                                                                                                                                                                                                                                             |
| Complete List of Authors:       | Brage, K; University of Southern Denmark, Sport Science and Clinical Biomechanics<br>Hjarbaek, John; Odense Universitetshospital, Department of Radiology, Musculoskeletal section<br>Kjaer, Per ; University of Southern Denmark, Institute of Sports Science and Clinical Biomechanics<br>Ingwersen, Kim G.; Sports Science and Clinical Biomechanics<br>Juul-Kristensen, Birgit; Research Unit for Musculoskeletal Function and Physiotherapy, Institute of Sports Science and Clinical Biomechanics |
| <b>Primary Subject Heading</b>: | Radiology and imaging                                                                                                                                                                                                                                                                                                                                                                                                                                                                                   |
| Secondary Subject Heading:      | Diagnostics                                                                                                                                                                                                                                                                                                                                                                                                                                                                                             |
| Keywords:                       | Strain elastography, supraspinatus tendon, rotator cuff, tendon quality, reliability, tendinopathy                                                                                                                                                                                                                                                                                                                                                                                                      |
|                                 |                                                                                                                                                                                                                                                                                                                                                                                                                                                                                                         |

SCHOLARONE™  
Manuscripts

1  
2  
3  
4 1 **ULTRASONIC STRAIN ELASTOGRAPHY FOR DETECTING ABNORMALITIES IN THE SUPRASPINATUS**  
5 2 **TENDON: AN INTRA- AND INTER-RATER RELIABILITY STUDY**  
6 3  
7 4  
8 5  
9 6

10 6 Brage K<sup>1,2</sup>, Hjarbaek J<sup>3</sup>, Kjaer P<sup>1,2</sup>, Ingwersen KG<sup>4</sup>, Juul-Kristensen B<sup>1</sup>  
11 7

12 8 <sup>1</sup> Department of Sports Science and Clinical Biomechanics, University of Southern Denmark,  
13 9 Campusvej 55, 5230 Odense M, DK

14 10 <sup>2</sup> UCL University College, Niels Bohrs Allé 1, 5230, Odense M, DK

15 11 <sup>3</sup> Department of Radiology, Odense University Hospital, J. B. Winsløws Vej 4, 5000 Odense C, DK

16 12 <sup>4</sup> Research Unit in Physiotherapy and Occupational Therapy, Hospital Lillebaelt, Kabbeltoft 25, 7100  
17 13 Vejle, DK  
18 14  
19 15

20 16 **Author information**

21 17 *Corresponding Author*

22 18 Karen Brage, PhD candidate, Telephone: +45 51787381, fax: 6318 3226, e-mail: kabr2@ucl.dk

23 19 *Co-Authors*

24 20 John Hjarbaek, MD, Telephone: +45 66113333, e-mail: john.hjarbaek@rsyd.dk

25 21 Per Kjaer, Professor, PhD., Telephone: +45 65504553, e-mail: pkjaer@health.sdu.dk

26 22 Kim Gordon Ingwersen, PhD., Telephone: +45 65509044, e-mail: kingwersen@health.sdu.dk

27 23 Birgit Juul-Kristensen, PhD.: Telephone: +45 65503412, e-mail: bjuul-kristensen@health.sdu.dk  
28 24  
29 25

30 26 **Wordcount**

31 27 4404  
32 28  
33 29

34 30 **Trial registration**

35 31 The study protocol was approved by the Ethics Committee for the Region of South Denmark (S-  
36 32 20160115) and reported to the Danish Data Protection Agency (2014-41-3266).  
37 33  
38  
39  
40  
41  
42  
43  
44  
45  
46  
47  
48  
49  
50  
51  
52  
53  
54  
55  
56  
57  
58  
59  
60

1  
2  
3  
4 1 ABSTRACT  
5

6  
7 2 **Objectives**  
8

9 3 The reliability of ultrasonic strain elastography (SEL) used to detect abnormalities in the  
10 4 supraspinatus tendon is unclear. Thus, the aim of this study was to investigate the reliability of SEL  
11 5 in the supraspinatus tendon.  
12  
13  
14  
15  
16

17 6  
18  
19 7 **Design**  
20

21 8 An intra-rater and inter-rater reliability study.  
22  
23  
24 9

25  
26 10 **Setting**  
27

28  
29 11 A single-centre study conducted at the University of Southern Denmark.  
30  
31 12

32  
33  
34 13 **Participants**  
35

36 14 Twenty participants with shoulder pain and MRI-verified supraspinatus tendinosis and 20  
37 15 asymptomatic participants (no MRI).  
38  
39  
40  
41 16

42  
43 17 **Primary and secondary outcome measures**  
44

45 18 Raw values (RAW), and ratios (deltoid muscle (DEL); gel pad (GEL) as reference tissues) were  
46 19 calculated and mean values of measurements from three regions of the supraspinatus tendon  
47 20 were reported. Colour scale ratings and number of yellow/red lesions from the three areas were  
48 21 also included.  
49  
50  
51  
52  
53  
54  
55  
56 22

57  
58 23 **Results**  
59  
60

1  
2  
3  
4 1 Intra-rater reliability showed Intra-Class Correlation Coefficients (ICCs) for RAW, DELT and GEL:  
5  
6  
7 2 0.97 (Minimal Detectable Change (MDC): 0.28 (6.36% of the mean); 0.89 (MDC: 2.91 (20.37%); and  
8  
9 3 0.73 (MDC: 1.61 (58.82%)), respectively. The ICCs for inter-rater reliability were 0.89 (MDC: 0.47  
10  
11 4 (10.53%); 0.78 (MDC: 3.69 (25.51%); and 0.70 (MDC: 1.75 (62.63%)), respectively.  
12  
13  
14 5 For colour scale ratings, intra-rater reliability (Linear Weighted kappa, LWk) ranged from 0.76 to  
15  
16 6 0.79, with the inter-rater reliability from 0.71 to 0.81. For the number of lesions, intra-rater  
17  
18 7 reliability ranged from 0.40 to 0.82, and inter-rater reliability from 0.24 to 0.67.  
19  
20  
21 8  
22  
23

## 24 9 **Conclusions**

25  
26 10 Intra-rater and inter-rater reliability were excellent for raw values and for ratios with deltoid  
27  
28 11 muscle as the reference tissue, and good for ratios with gel pad as the reference tissue. The  
29  
30 12 reliability of colour scale ratings was substantial to almost perfect, and for the number of lesions  
31  
32 13 fair to almost perfect.  
33  
34

35  
36 14 Although high reliability was found, validity and responsiveness of these elastographic methods  
37  
38 15 needs further investigation.  
39  
40  
41 16  
42

## 43 17 **Strengths and limitations of this study**

- 44  
45 18 • Standardised procedure for capturing strain elastographic images was developed and applied
- 46  
47 19 • Raw values of strain elastographic images were presented
- 48  
49 20 • Ratios, based on different reference tissues or areas (deltoid muscle/gel pad), of strain  
50  
51 21 elastographic images were calculated and presented
- 52  
53 22 • Specific procedures for colour grading strain elastographic images were presented
- 54  
55 23 • SEL is highly operator-dependent
- 56  
57  
58  
59  
60

## 1 INTRODUCTION

2 Shoulder pain is a common symptom, with a lifetime prevalence in the general population of 6.7-  
3 66.7%<sup>1</sup> and subacromial pain syndrome is the second most common cause of pain in the  
4 shoulder.<sup>2</sup> Shoulder pain has consequences such as physical limitations, mental problems<sup>3</sup> and  
5 absence from work.<sup>4</sup>

6  
7 Shoulder disorders are evaluated by history-taking and physical examination, potentially  
8 supplemented with X-ray, conventional ultrasound and/or Magnetic Resonance Imaging (MRI).  
9 However, supraspinatus tendon abnormalities are also found in asymptomatic people when using  
10 general modalities such as MRI and ultrasound.<sup>5</sup> Furthermore, it seems difficult to distinguish  
11 pathological changes from healthy tissues by using conventional ultrasound because pathological  
12 regions often exhibit the same echogenicity as non-pathological regions.<sup>6</sup>

13  
14 Strain elastography (SEL) is a relatively new and not yet well-established method, which may assist  
15 in diagnosis, prediction and monitoring of progress in tendon healing.<sup>7</sup>

16 SEL defines the physical properties of soft tissues through characterisation of the differences in  
17 stiffness between 'the regions of interest' (ROI) and the surrounding tissues.<sup>8,9</sup> Conventional  
18 ultrasound and MRI were developed for visualisation of macroscopic changes and not specifically  
19 for the mechanical tendon properties, which is why SEL may add further knowledge to  
20 conventional shoulder imaging. Since tendon quality is a prognostic factor for rotator cuff repair,  
21 information about tendon stiffness could be beneficial for the surgeon.<sup>10</sup>

22 Tissue deformation using SEL is obtained by uniform mechanically induced compressions (strain)  
23 of the structures under the ultrasound transducer, during the ultrasound scan. Through manual

1  
2  
3  
4  
5  
6  
7  
8  
9  
10  
11  
12  
13  
14  
15  
16  
17  
18  
19  
20  
21  
22  
23  
24  
25  
26  
27  
28  
29  
30  
31  
32  
33  
34  
35  
36  
37  
38  
39  
40  
41  
42  
43  
44  
45  
46  
47  
48  
49  
50  
51  
52  
53  
54  
55  
56  
57  
58  
59  
60

1 compression, the soft tissue deforms differently depending on its inherent stiffness. The degree of  
2 deformation can be interpreted as an estimate of the tissue stiffness.<sup>11</sup>

3  
4 SEL has recently been used in the musculoskeletal area, where the achilles tendon has been the  
5 primary focus.<sup>12</sup> A few studies have found significant associations between pathology identified by  
6 SEL and MRI in patients with supraspinatus tendinopathy,<sup>13 14</sup> besides significant correlations  
7 between results from SEL and clinical tests and questionnaires in patients with small supraspinatus  
8 tendon tears.<sup>15</sup> One study also found SEL to be able to detect increased stiffness in the  
9 supraspinatus tendon elasticity and muscle elasticity with increased muscle contraction in healthy  
10 participants.<sup>16</sup> Although only a few studies have been performed, and with different aims,  
11 comparator instruments, procedures, reference tissues and data types, the concurrent validity of  
12 SEL in the supraspinatus tendon seems promising.<sup>13-16</sup>

13  
14 However, the reliability of SEL must first be proven to be acceptable. In this respect, SEL  
15 constitutes several challenges since SEL is a technique with relatively high operator dependency in  
16 terms of the manually applied pressure and subsequent identification and selection of the  
17 pathological ROI.

18 One of only two reliability studies found the inter-rater reliability of SEL in the supraspinatus  
19 tendon to be almost perfect ( $\kappa = 0.83$ ) with respect to the number of focal lesions in 118 patients  
20 with MRI-verified supraspinatus tendinopathy.<sup>14</sup> However, this study did not include a healthy  
21 control group which is recommended for reliability and validity studies, to achieve realistic tissue  
22 variation.<sup>17</sup> Furthermore, the study used only colour quantification.<sup>14</sup> The other study found a high  
23 intra-rater reliability ( $ICC_{1,3} = 0.92-0.99$ ) with respect to ROI, when using an acoustic coupler as

1  
2  
3  
4 1 the reference tissue in a small sample of 23 healthy participants. The limitations of this study  
5  
6  
7 2 were: not including a group with pathology, not defining ROI and only using one type of reference  
8  
9 3 tissue (acoustic coupler).<sup>16</sup> Since standardised and consensus procedures for conducting  
10  
11 4 elastography in the supraspinatus tendon have not yet been established, there is a need to  
12  
13  
14 5 investigate which reference tissue has the highest reliability. To our knowledge, there has not  
15  
16  
17 6 been a study investigating the reliability of SEL in the supraspinatus tendon that has included both  
18  
19 7 patients with a pathological (non-ruptured) supraspinatus tendon and healthy participants with  
20  
21 8 non-painful shoulders. Furthermore, choice of reference tissue and quantification methods has  
22  
23  
24 9 major impact on results, but no reliability studies have compared these different approaches.  
25  
26  
27 10

28  
29 11 The aim of this study was to test the intra-rater and inter-rater reliability of SEL within the  
30  
31 12 supraspinatus tendon in patients and healthy participants, using different reference tissues  
32  
33 13 (deltoid muscle (DELTA), gel pad (GEL)), and different quantification methods (raw data, strain  
34  
35  
36 14 ratios, colour scale rating and counting number of yellow/red lesions).  
37  
38  
39 15  
40  
41 16  
42  
43 17  
44  
45  
46  
47  
48  
49  
50  
51  
52  
53  
54  
55  
56  
57  
58  
59  
60

## 1 MATERIALS AND METHODS

2 This study was an intra-rater and inter-rater reliability study of SEL, used on the supraspinatus  
3 tendon, reported according to the Guidelines for Reporting Reliability and Agreement Studies  
4 (GRRAS).<sup>18</sup>

5  
6 A three-phased intra-rater and inter-rater reliability protocol for diagnostic reliability studies was  
7 used.<sup>17</sup> The protocol included a training phase (Phase One), an overall agreement phase (Phase  
8 Two), and an actual study phase (Phase Three), for securing low clinician dependency and  
9 subjectivity, sufficient experience and standardisation, and minimisation of systematic bias.<sup>17</sup> In  
10 order to progress to the study phase, the criterion of at least 80% inter-rater agreement in Phase  
11 Two was used. Such a protocol has previously been used in reliability studies, using ultrasound  
12 methods.<sup>19 20</sup>

### 14 Study procedures

15 The study's participants were recruited from August 2016 to December 2017. Symptomatic  
16 participants, with an MRI-verified supraspinatus tendinosis (*patients*), were recruited from the  
17 Radiology Department at Odense University Hospital within 14 days of their MRI examination.  
18 Participants with no shoulder symptoms (*healthy participants*) were recruited primarily from the  
19 University of Southern Denmark and the UCL University College, both situated in Odense. Except  
20 for MRI, all the procedures were performed at the University of Southern Denmark. After  
21 inclusion, participants underwent clinical tests (performed by KGI) and filled out questionnaires  
22 regarding functional limitations, pain and quality of life. Testing procedures took place once and  
23 lasted approximately one hour.



1  
2  
3  
4 1 All SEL images were captured by the same clinician (KB), while two raters performed the SEL  
5  
6  
7 2 measurements on the captured images. Rater 1 (KB), radiographer, was thoroughly trained in  
8  
9 3 using SEL on the shoulder by Rater 2 (JH), radiologist, who had more than 20 years' experience in  
10  
11 4 clinical musculoskeletal ultrasound. In Phase Three, the raters were blinded to each other's results  
12  
13  
14 5 (data were stored separately), the participants' health status (Rater 1 entered the room after  
15  
16 6 clinical tests and questionnaires were performed, and Rater 2 had no contact with the  
17  
18  
19 7 participants) and their MRI results (ID-numbers were changed after MRI examinations).  
20  
21  
22 8

23  
24 9 SEL images were stored for at least 14 days after image capturing until the first image assessment,  
25  
26 10 to ensure elimination of any memory of pain response during SEL by Rater 1. Further, all SEL  
27  
28  
29 11 images were stored for an additional 14 days before Rater 1's second assessment, to ensure  
30  
31 12 elimination of recalls of SEL results from the first assessment.  
32  
33  
34 13

35  
36 14 The study protocol was approved by the Ethics Committee for the Region of South Denmark (S-  
37  
38 15 20160115) and reported to the Danish Data Protection Agency (2014-41-3266). All participants  
39  
40  
41 16 had oral and written information about the study and signed an informed consent form before  
42  
43  
44 17 participation in this study.  
45  
46 18

## 47 48 19 **Patient and Public Involvement**

49  
50  
51 20 Patients and public were not involved in this study.  
52  
53 21

## 54 55 22 **Participants**

56  
57  
58 23 *Inclusion and exclusion criteria*  
59  
60

1  
2  
3  
4 1 An inclusion criterion for both patients and healthy participants was age 18-65 years. In addition,  
5  
6 2 patients had to have at least one shoulder clinically diagnosed with tendinosis (positive signs from  
7  
8 3  $\geq 3$  clinical tests (Hawkins-Kennedy test; Neers test; Empty Can test; Full Can test; Resisted  
9  
10 4 external rotation test)) and based on MRI ( $\geq$  Grade 1; corresponding to focal increase in tendon  
11  
12 5 signal on protondensity-weighted and fat-suppressed T2 sequences not equal to that of fluid.<sup>21</sup>  
13  
14 6 If both shoulders were MRI-scanned, the most severely affected side was included.  
15  
16 7 Inclusion criteria for the healthy participants were no previously experienced shoulder problems,  
17  
18 8 and negative signs from all five clinical tests described above. For these participants, the choice of  
19  
20 9 shoulder was matched with that of the patients.  
21  
22 10 Exclusion criteria for both groups were: Tears  $>1/3$  of the vertical height of the supraspinatus  
23  
24 11 tendon, since the stress may be increased on the intact tendon part, and calcifications  $>2$  mm  
25  
26 12 (length) due to acoustic shadowing. Further exclusion criteria were: previous comorbidities  
27  
28 13 (potentially harmful to the tendon) such as; past/present shoulder fractures, surgery and luxation,  
29  
30 14 known neuromuscular disease, rheumatoid arthritis, cancer, fibromyalgia, spondyloarthropathy  
31  
32 15 and psychiatric disorders. Pregnancy and inability to read and understand Danish were also  
33  
34 16 exclusion criteria.  
35  
36  
37  
38  
39  
40  
41  
42  
43  
44  
45

## 18 **SEL image capturing and measurement**

### 19 *Apparatus*

20 All measurements were performed with the Logiq S7 using a 15 MHz linear probe (GE Healthcare,  
21 Milwaukee, USA). Manufacturer recommendations for musculoskeletal SEL of the shoulder were  
22 used, including a transducer movement rate of approximately 120 cycles/min, axial smoothing of  
23 2, lateral smoothing of 3, frequency of 10 and a soft/hard compression of 5.

1  
2  
3  
4 1 *Patient placement*

5  
6  
7 2 The SEL was obtained with the patient sitting in an erect posture with the arm internally rotated,  
8  
9 3 elbow flexed to 90° and with the dorsal side of the hand placed over the sacrum, as previously  
10  
11 4 used.<sup>15</sup> The probe was placed on the anterior aspect of the acromion in the coronal plane and the  
12  
13 5 images were obtained just laterally to the anterior-lateral corner of the acromion in the  
14  
15 6 longitudinal plane of the supraspinatus tendon (Figure 1).  
16  
17  
18  
19  
20

21 8 *Image capturing*

22  
23  
24 9 An image window depth of at least three times the tendon size and an image width covering about  
25  
26 10 three-quarters of the screen were used as recommended for longitudinal SEL.<sup>22</sup> The tissue was  
27  
28 11 compressed approximately 2-5 mm,<sup>9</sup> and a software incorporated quality control (expressed as 1-  
29  
30 12 5 green bars being displayed, with 5 bars being the most acceptable) was used to evaluate the  
31  
32 13 recommended compression size.  
33  
34  
35  
36  
37  
38

39 15 For each assessment method (with or without GEL covering the transducer, (Sonokit (Proxon),  
40  
41 16 thickness: 10 mm, length: 70 mm, elastic modulus: 226 kPa; Sonogel Vertriebs GmbH, Germany)),  
42  
43 17 three sessions of 20 seconds were obtained.  
44  
45  
46  
47

48 19 *Image measurements*

49  
50 20 Tendon characteristics were evaluated quantitatively and qualitatively.

51  
52  
53 21 Quantitatively, ROIs on the SEL images were drawn over the target area (supraspinatus tendon)  
54  
55 22 and the exact raw strain value (RAW) (0-6; 6 being the hardest tissue) was calculated.  
56  
57  
58  
59  
60

1  
2  
3  
4  
5  
6  
7  
8  
9  
10  
11  
12  
13  
14  
15  
16  
17  
18  
19  
20  
21  
22  
23  
24  
25  
26  
27  
28  
29  
30  
31  
32  
33  
34  
35  
36  
37  
38  
39  
40  
41  
42  
43  
44  
45  
46  
47  
48  
49  
50  
51  
52  
53  
54  
55  
56  
57  
58  
59  
60

1 Further, an adjacent reference region (normal tissue, experiencing the same stress as the target  
2 region) was drawn. From these two variables, the strain ratio (0-60; 60 being the hardest tissue)  
3 was calculated.<sup>23</sup> Two different reference tissues were used: a 1 mm circle region in a soft part of  
4 the deltoid/bursal area for the DELT measurement (Figure 2), and a 5 mm circle region in GEL  
5 covering the transducer, for the GEL measurement (Figure 3).<sup>13 24</sup> GEL was used as a more  
6 homogeneous reference tissue.

7 For the raw values alone and the strain ratios (strain raw value of supraspinatus tendon (A) to  
8 strain raw value of reference tissue (B) = A/B), a mean of the three measured areas of the  
9 supraspinatus tendon was calculated including data from 5-15 seconds of the 20-second cycle as  
10 recommended by the manufacturer.

11 Quantitative measurements were based on examination of three entire cine-loops (10 seconds)  
12 rather than on single static images,<sup>25</sup> in order to minimise intra-observer variation and avoid  
13 transient temporal fluctuations. Only sequences with the highest image quality (with green bars  
14 on the quality assessment) were used as recommended by the manufacturer.

15  
16 Due to difficulties in defining the most lateral part of the supraspinatus insertion on the humeral  
17 head, a 6.5 mm chord was drawn (in the lateral direction) from the medial part of the insertion on  
18 the humeral head to the lateral part of the tuberculum major. The average length of the  
19 supraspinatus insertion has previously been estimated to be 6.5 mm.<sup>26</sup> This fix point (end of the  
20 line at the lateral part of the insertion) was used to draw a 23 mm (7.7 x 3) horizontal line in the  
21 medial direction (which has been estimated to be the average length of the tendon),<sup>27</sup> ensuring  
22 agreement of measurement area (Figure 4).

1  
2  
3  
4 1 Caudal borders for image measurements were bony surfaces (of the humeral head), while cranial  
5  
6  
7 2 borders were the transition zone between the superior surface of the supraspinatus tendon and  
8  
9 3 the inferior surface of the deltoid muscle and bursa. The bursa area was used as reference tissue  
10  
11 4 (red colour in the SEL image). If no red border was seen, an estimated border followed the  
12  
13  
14 5 superior surface of the tendon.  
15  
16  
17 6

18  
19 7 Qualitatively, the images were rated using a colour scale, from 1-4, according to the following:  
20  
21 8 Type 1, < 10% colour other than blue (indicating a high tissue stiffness); Type 2, 11-25% colour  
22  
23 9 other than blue; Type 3, 26-50% colour other than blue; or Type 4, > 50% colour other than blue  
24  
25  
26 10 (indicating a low tissue stiffness). Furthermore, the number of yellow/red lesions was graded as  
27  
28 11 follows: 0=no lesions; 1=one lesion; 2=two lesions; and 3=more than two lesions.<sup>14</sup> The qualitative  
29  
30  
31 12 classifications were all performed on the first high quality image recorded closest to 10 seconds  
32  
33  
34 13 into the first cycle.  
35  
36 14

### 37 38 15 **Development of SEL method**

39  
40  
41 16 Based on previous studies,<sup>14 16 25 28-31</sup> a protocol with standardised procedures was developed for  
42  
43 17 obtaining SEL characteristics in the Supraspinatus tendon and tested in Phase One on 10  
44  
45  
46 18 participants.  
47

48 19 Based on the results from these participants, adjustments to the type of reference tissue and  
49  
50 20 colour scale criteria were performed. One adjustment involved the replacement of the  
51  
52  
53 21 subcutaneous fat with DELT as reference tissue, since the subcutaneous fat layer in some  
54  
55  
56 22 participants was too thin to measure. Another adjustment was to base the colour scale on the  
57  
58  
59  
60

1  
2  
3  
4 1 percentage of colour (replacement of estimation of the most pronounced colour), which made it  
5  
6  
7 2 possible to rate a blue (hard) tendon as softer if it appeared with yellow/red lesions.  
8

9 3 In Phase Two, the adjusted protocol was applied to 20 new participants. Overall agreement in  
10  
11 4 Phase Two corresponded to >80% with blinded raters. Thereafter, Phase Three (n=40) was  
12  
13  
14 5 initiated based on the final protocol, as described above.  
15  
16  
17 6

## 18 19 7 **Questionnaires**

20  
21 8 Participants completed questionnaires, including the DASH (Disabilities of the Arm, Shoulder and  
22  
23  
24 9 Hand) for investigating disability of the upper extremities (0-100; 100 being most disabled),<sup>32</sup>  
25  
26 10 The VAS (Visual Analogue Scale) for assessing pain level (0-100; 100 being the most painful),<sup>33</sup> the  
27  
28  
29 11 EQ-5D-3L for measuring health-related quality of life, and the EQ-VAS<sup>34</sup> also for health-related  
30  
31 12 quality of life (0-100; 100 being best imaginable health status). Demographic data included  
32  
33  
34 13 information on age, sex, and BMI.  
35  
36 14

## 37 38 15 **Statistics**

39  
40  
41 16 SEL data were found to be normally distributed on a histogram. For continuous data (mean of the  
42  
43 17 three measured areas of the supraspinatus tendon) the ICC (model 2.3, absolute agreement, 2-  
44  
45  
46 18 way random, single measures) was calculated to determine intra-rater and inter-rater reliability.<sup>35</sup>  
47  
48 19 The ICC, with 95% confidence intervals (95% C.I.), was calculated for RAW, and for strain ratios  
49  
50  
51 20 (DELTA and GEL). The ICCs were interpreted as <0.40=poor, 0.40-0.59=fair, 0.60-0.74=good and ≥  
52  
53 21 0.75=excellent reliability.<sup>36</sup>  
54  
55  
56 22  
57  
58  
59  
60

1  
2  
3  
4 1 Paired student t-tests were completed for statistical comparison of ratings (Rater 1 (first time) vs.  
5  
6  
7 2 Rater 1 (second time), and Rater 1 vs. Rater 2) using a significance level of 0.05. Bland and Altman  
8  
9 3 plots with 95% limits of agreement (LOA) were calculated to evaluate systematic differences,<sup>37</sup>  
10  
11 4 with the 95% LOA calculated as the mean difference  $\pm$  1.96 x standard deviation of the difference  
12  
13  
14 5 (SD).<sup>38</sup>  
15  
16  
17 6

18  
19 7 Standard Error of Measurements (SEM) was calculated using the formula: SEM = SDmean  
20  
21 8 difference/ $\sqrt{2}$ ,<sup>39</sup> and Minimal Detectable Change 95% (MDC<sub>individual</sub>) was calculated using the  
22  
23  
24 9 formula: MDC =SEM x  $\sqrt{2}$  x 1.96<sup>40</sup> and the relative MDC was calculated as a percentage of the  
25  
26 10 average SEL values of Rater 1 and Rater 2.  
27  
28  
29 11

30  
31 12 For ordinal data, linear weighted Cohen's  $\kappa$  (LW $\kappa$ ) was used to calculate reliability with 95% CIs for  
32  
33 13 colour ratings and number of lesions. LW $\kappa$  was interpreted as <0=poor agreement, 0.01-  
34  
35  
36 14 0.20=slight agreement, 0.21-0.40=fair agreement, 0.41-0.60=moderate agreement, 0.61-  
37  
38  
39 15 0.80=substantial agreement and >0.81=almost perfect agreement.<sup>41</sup>  
40  
41 16

42  
43 17 Statistical analyses were performed in SPSS, version 25.0 (SPSS Inc., Chicago, IL).  
44  
45  
46 18  
47  
48 19  
49  
50  
51  
52  
53  
54  
55  
56  
57  
58  
59  
60

## 1 RESULTS

2  
3  
4  
5  
6  
7  
8  
9  
10  
11  
12  
13  
14  
15  
16  
17  
18  
19  
20  
21  
22  
23  
24  
25  
26  
27  
28  
29  
30  
31  
32  
33  
34  
35  
36  
37  
38  
39  
40  
41  
42  
43  
44  
45  
46  
47  
48  
49  
50  
51  
52  
53  
54  
55  
56  
57  
58  
59  
60

2 Demographics varied between patients and healthy participants, on most parameters. Due to the  
3 sampling method, the patients were expected to be older, with a higher BMI, more pain and  
4 disability, and reduced quality of life compared with healthy participants (Table 1).

**Table 1**

Demographics (mean; SD (frequencies and percentages for dominant arm and EQ-5D)) of patients and healthy participants from the study phase (n = 40).

| Variable                    | Patients (n = 20)  | Healthy participants (n = 20) |
|-----------------------------|--------------------|-------------------------------|
| Age (years)                 | 47.85 (7.63)       | 25.70 (6.10)                  |
| Females (%)                 | 14 (70)            | 11 (55)                       |
| BMI                         | 30.49 (6.57)       | 24.94 (2.45)                  |
| Dominant arm                | 12 (60%)           | 10 (50%)                      |
| VAS rest (0-100)            | 24.60 (20.96)      | 0 (0.00)                      |
| VAS activity (0-100)        | 53.35 (16.62)      | 0 (0.00)                      |
| VAS sleep (0-100)           | 49.60 (18.26)      | 0 (0.00)                      |
| VAS maximum (0-100)         | 78.05 (11.62)      | 0 (0.00)                      |
| DASH (0-100)                | 34.75 (17.48)      | 1.71 (4.21)                   |
| EQ-VAS (0-100)              | 53.24 (38.31)      | 72.90 (36.40)                 |
| <b>EQ-5D-3L</b>             | <b>Frequencies</b> | <b>Frequencies</b>            |
| Mobility problems           | 0 (0%)             | 0 (0%)                        |
| Self-care problems          | 10 (50%)           | 1 (5%)                        |
| Usual activities problems   | 1 (5%)             | 0 (0%)                        |
| Pain/discomfort problems    | 20 (100%)          | 1 (5%)                        |
| Anxiety/depression problems | 5 (20%)            | 1 (5%)                        |

Abbreviations: SD, Standard Deviation; BMI, Body Mass Index; VAS, Visual Analogue Scale; DASH, Disability of the Arm, Shoulder and Hand Questionnaire; EQ-5D-3L, Quality of Life by dimension; EQ-VAS, Quality of Life

6  
7  
8  
9  
10  
11  
12  
13  
14  
15  
16  
17  
18  
19  
20  
21  
22  
23  
24  
25  
26  
27  
28  
29  
30  
31  
32  
33  
34  
35  
36  
37  
38  
39  
40  
41  
42  
43  
44  
45  
46  
47  
48  
49  
50  
51  
52  
53  
54  
55  
56  
57  
58  
59  
60

6 The paired t-test showed statistical differences in inter-rater measurements for RAW and in intra-  
7 rater measurements for GEL (Table 2).



1

**Table 2**

Reliability of strain elastography in the Supraspinatus tendon using respectively the deltoid muscle (reference) and a gel pad (reference) and raw data from the study phase (n = 40).

| <b>Continuous scale</b>   | Mean (SD)      | Mean (SD)      | Mean Difference (SD) | P     | LOA         | SEM  | MDC (%)      | ICC (95% C.I.)   |
|---------------------------|----------------|----------------|----------------------|-------|-------------|------|--------------|------------------|
| <b>Mean across tendon</b> |                |                |                      |       |             |      |              |                  |
| <b>Intra-rater</b>        | <b>Rater 1</b> | <b>Rater 1</b> |                      |       |             |      |              |                  |
| RAW                       | 4.40 (0.55)    | 4.36 (0.55)    | 0.04 (0.14)          | 0.09  | -0.24; 0.33 | 0.10 | 0.28 (6.36)  | 0.97 (0.93-0.98) |
| DELT (ratio)              | 14.33 (3.07)   | 14.23 (3.16)   | 0.10 (1.48)          | 0.66  | -2.81; 3.01 | 1.05 | 2.91 (20.37) | 0.89 (0.80-0.94) |
| GEL (ratio)               | 2.87 (1.28)    | 2.59 (1.01)    | 0.28 (0.82)          | 0.04* | -1.33; 1.89 | 0.58 | 1.61 (58.82) | 0.73 (0.54-0.85) |
| <b>Inter-rater</b>        | <b>Rater 1</b> | <b>Rater 2</b> |                      |       |             |      |              |                  |
| RAW                       | 4.40 (0.55)    | 4.53 (0.61)    | -0.13 (0.24)         | 0.00* | -0.60; 0.34 | 0.17 | 0.47 (10.53) | 0.89 (0.75-0.95) |
| DELT (ratio)              | 14.33 (3.07)   | 14.56 (2.60)   | -0.22 (1.88)         | 0.46  | -3.91; 3.46 | 1.33 | 3.69 (25.51) | 0.78 (0.63-0.88) |
| GEL (ratio)               | 2.87 (1.28)    | 2.73 (1.00)    | 0.14 (0.89)          | 0.32  | -1.61; 1.90 | 0.63 | 1.75 (62.63) | 0.70 (0.50-0.83) |

2 Abbreviations: SD, Standard Deviation; LOA, Limits of Agreement; SEM, Standard Error of Mean; MDC, Minimal Detectable Change; ICC (95% C.I.),  
 3 Intra-class Correlation Coefficient with 95% confidence intervals; DELT, Reference area in the Deltoid Muscle; GEL, Reference area in the Gel Pad;  
 4 RAW, Raw Elastography Data; \*, significant difference ( $p \leq 0.05$ ) between measurements.

5

1  
2  
3  
4 1 None of the Bland and Altman plots showed funnel effects (increasing difference with  
5  
6  
7 2 increasing mean size) (Figure 5).  
8  
9

10 3 For intra-rater and inter-rater reliability, there was 'excellent agreement' using RAW and  
11  
12 4 DELT (ICC: intra-rater: 0.97, inter-rater: 0.89), (ICC: intra-rater: 0.89, inter-rater: 0.78)  
13  
14  
15 5 respectively and the reliability was 'good' when using GEL (ICC: intra-rater: 0.73, inter-rater:  
16  
17 6 0.70) (Table 2). The same pattern of results was also seen for each of the three measured  
18  
19 7 areas of the Supraspinatus tendon (medial, middle and lateral parts) (not shown in tables).  
20  
21  
22 8

23  
24  
25 9 For the intra-rater reliability, the relative MDC was smallest for RAW (6.36%), larger for  
26  
27 10 DELT (20.37%) and largest for GEL (58.82%). For inter-rater reliability, the same pattern was  
28  
29  
30 11 seen for MDC, with a minimum of 10.53%, 25.51% and 62.63%, for RAW, DELT and GEL,  
31  
32 12 respectively.  
33

34  
35 13 The reliability of using the colour scale (performed without GEL), kappa (LWk) was very  
36  
37 14 similar, with intra-rater reliability ranging from LWk: 0.76-0.79, representing 'substantial  
38  
39 15 agreement', and inter-rater agreement ranging from LWk: 0.71-0.81 representing  
40  
41  
42 16 'substantial to almost perfect agreement'.  
43

44  
45 17 For the number of yellow/red lesions, LWk was generally highest for intra-rater ranging from  
46  
47 18 0.40-0.82 representing 'fair to almost perfect agreement', while for inter-rater reliability  
48  
49 19 LWk ranged from 0.24-0.67 representing 'fair to substantial agreement' (Table 3).  
50  
51  
52  
53  
54  
55  
56  
57  
58  
59  
60

**Table 3**

Reliability of strain elastography in the Supraspinatus tendon using data based on colours, respectively a colour scale and counting the number of lesions from the study phase (n=40)

| Ordinal scale        | Intra-rater         |                   | Inter-rater         |                   |
|----------------------|---------------------|-------------------|---------------------|-------------------|
|                      | Total Agreement (%) | LWκ (95% C.I.)    | Total Agreement (%) | LWκ (95% C.I.)    |
| <b>Colourscale</b>   |                     |                   |                     |                   |
| Medial tendon 1/3    | 80                  | 0.76 (0.64-0.89)  | 80                  | 0.77 (0.63-0.91)  |
| Middle tendon 1/3    | 82.5                | 0.77 (0.65-0.88)  | 76                  | 0.71 (0.58-0.83)  |
| Lateral tendon 1/3   | 85                  | 0.79 (0.65-0.94)  | 87.5                | 0.81 (0.65-0.97)  |
| <b>Lesions (no.)</b> |                     |                   |                     |                   |
| Medial tendon 1/3    | 87.5                | 0.82 (0.69-0.95)  | 82.5                | 0.67 (0.53-0.80)  |
| Middle tendon 1/3    | 90                  | 0.75 (0.51-1.00)  | 87.5                | 0.63 (0.30-0.96)  |
| Lateral tendon 1/3   | 87.5                | 0.40 (-0.16-0.97) | 90                  | 0.24 (-0.14-0.62) |

Abbreviations: LWκ (95% C.I.), Linear Weighted κ with 95% confidence intervals

1

1  
2  
3  
4 1 For the medial and middle tendon part of the supraspinatus, LWk was 'substantial to almost  
5  
6 perfect' for intra-rater (LWk 0.75-0.82) and 'substantial' for inter-rater (LWk 0.63-0.67)  
7  
8  
9 3 reliability, while for the lateral tendon part, LWk was low, corresponding to only 0.40 and  
10  
11 4 0.24 for intra-rater and inter-rater reliability, respectively, representing 'fair agreement'.  
12  
13  
14 5  
15  
16 6  
17  
18  
19  
20  
21  
22  
23  
24  
25  
26  
27  
28  
29  
30  
31  
32  
33  
34  
35  
36  
37  
38  
39  
40  
41  
42  
43  
44  
45  
46  
47  
48  
49  
50  
51  
52  
53  
54  
55  
56  
57  
58  
59  
60

For peer review only

## 1 DISCUSSION

2 The reliability of the results from SEL was 'excellent' when using the raw data and DELT as  
3 reference tissue. When using GEL as reference tissue, the reliability of the results was 'good'.  
4 Furthermore, the relative MDC (% of mean) was smallest for RAW and largest for GEL.

5  
6 When using the colour scale grading, LWk represented 'substantial agreement' to  
7 'substantial to almost perfect agreement'. For the number of yellow/red lesions, LWK was  
8 highest for intra-rater reliability, in the medial and middle tendon parts, LWk was 'substantial  
9 to almost perfect', while for the lateral tendon part LWk was low, corresponding to only  
10 'fair' agreement'.

### 11 12 **Strain Ratios and Raw data**

13 The ROIs with raw SEL data (no reference tissue) resulted in the highest reliability in intra-  
14 rater as well as inter-rater reliability. Although there was a significant difference between  
15 Rater 1 and Rater 2 for RAW, this difference was less than the MDC and is ascribed to  
16 measurement error.

17 To our knowledge, no study has previously presented raw SEL data, which precludes  
18 comparison with other studies. Using raw data has limitations, since there is, in comparison  
19 with using ratios, no possibilities to adjust for different transducer pressures. On the other  
20 hand, the advantage is that it gives a more quantitative estimate than when using visual  
21 inspections, as for example in the colour scale, or with uncertainties due to selection of  
22 reference tissue.

1  
2  
3  
4 1 In the current study, only one rater captured the images (using almost the same pressure)  
5  
6 2 and two raters traced and measured the areas. If more than one rater were to capture the  
7  
8  
9 3 images, a lower reliability may be expected, due to potentially different transducer pressure.  
10  
11 4  
12  
13 5 Different reference tissues in SEL measurements of the musculoskeletal area make it difficult  
14  
15 6 to compare data across studies. The reference tissues previously used for calculating strain  
16  
17 7 ratios in the achilles and supraspinatus tendon areas have included bone,<sup>15</sup> fat,<sup>13 25 31 42 43</sup> and  
18  
19 8 GEL/acoustic coupler.<sup>13 16 44</sup> Using bone as a reference value has limitations, since ultrasound  
20  
21  
22 9 cannot penetrate bone material, meaning that data coming from this region are artefacts.  
23  
24  
25 10 In addition, strain ratios may be based on different equations in different studies, placing the  
26  
27 11 ROIs of the tendon in the denominator,<sup>13 45</sup> or, as in the current study, in the numerator.<sup>25 31</sup>  
28  
29  
30 12 Due to thin subcutaneous fat tissue area in some participants, the reference tissue was  
31  
32 13 replaced, after Phase One, with DELT and GEL (artificial fat tissue).  
33  
34  
35 14 When using DELT as the reference tissue, reliability was found to be excellent (both intra-  
36  
37 15 rater and inter-rater). Muscle tissue increases stiffness significantly after exercise and muscle  
38  
39 16 contractions,<sup>16 24</sup> and therefore, limitations are recognised when using this tissue as  
40  
41  
42 17 reference when for example, investigating tendon tissue response to muscle contractions.  
43  
44  
45 18 However, no previous study of SEL on the supraspinatus tendon has used muscle tissue as a  
46  
47 19 reference for the calculated strain ratios.  
48  
49  
50 20  
51  
52  
53 21 The current study found a high MDC for GEL (large measurement error) but a good reliability  
54  
55 22 (ICC 0.70-0.73), in line with previous studies. One study, using the Kager's fat pad (fat  
56  
57 23 deposit within the Kager triangle anterior to the achilles tendon) as reference tissue in the  
58  
59  
60

1  
2  
3  
4 1 achilles tendon, also found good to excellent intra-rater and inter-tester reliability (ICC: 0.51-  
5  
6 0.78) in the longitudinal plane; however, with much lower reliability (ICC: 0.41-0.45) in the  
7  
8 axial plane.<sup>25</sup> Unfortunately, MDC was not reported. The ICC and MDC in the current study  
9  
10 are reported as single measures, as it is of relevance to clinicians. None of the previous  
11  
12 studies<sup>16 44</sup> have described whether ICC is reported as a single measure or (group) average  
13  
14 measure, however, it is anticipated that it is a group average measure. In the current study,  
15  
16 the ICC will increase about 10% and the MDC will decrease up to 80% when reported as  
17  
18 average measures. This could explain some of the differences in results between the current  
19  
20 and previous studies.  
21  
22  
23  
24  
25

26 10 In the current study, the data using GEL are also in line with a study using an acoustic  
27  
28 coupler as reference tissue in the supraspinatus tendon,<sup>16</sup> where excellent intra-rater  
29  
30 reliability was shown, as was also confirmed for the achilles tendon.<sup>44</sup> An acoustic coupler is  
31  
32 similar to GEL and may be acceptable, but ideally, the reference area should be the same  
33  
34 depth as the ROI (in this case, the supraspinatus tendon). As GEL is not located close to the  
35  
36 tendon, the ROIs using GEL will not be subjected to the same amount of tissue pressure as  
37  
38 the tendon, which may affect reliability and validity.  
39  
40  
41  
42

43 17 The current study found the lowest reliability (however, it was still graded 'good') when  
44  
45 using GEL which may be caused by difficulties locating the footprint of the tendon, due to  
46  
47 lower image quality, because of increased depth (through 10 mm of GEL).  
48  
49

50 20 A statistically significant intra-rater difference was also seen, but as this difference was  
51  
52 below the MDC, it can be ascribed to measurement error.  
53  
54  
55

56 22

## 58 23 **Colour Ratings**

1  
2  
3  
4 1 The current study found a high reliability ('substantial' to 'almost perfect') when grading the  
5  
6 2 ROIs of SEL images according to a 4-level colour scale, where blue tissue indicated hard  
7  
8 3 tissue and red tissue indicated soft tissue. This is in line with a previous study on the achilles  
9  
10 4 tendon using colour scales of 5 levels (1=blue (hardest tissue), 2=light blue, 3=green,  
11  
12 5 4=yellow, 5=red (softest tissue)), where good to excellent inter-rater ( $\kappa = 0.897$ ) and intra-  
13  
14 6 rater ( $\kappa = 1$ ) reliability was found.<sup>30</sup>  
15  
16  
17  
18  
19  
20  
21  
22

23  
24 8 Alternative types of colour scales have been used in the musculoskeletal area, primarily for  
25  
26 9 the achilles tendon, with categorisation of the achilles tendon into a two-level category scale  
27  
28 10 (green/blue vs. red),<sup>25</sup> and a three-level category scale (blue/yellow/red).<sup>22 29</sup> The current  
29  
30 11 study has used the same colours for defining hard tissue (blue), and for soft tissue (red), but  
31  
32 12 with a four-level category scale, and with more precise criteria for the different levels which  
33  
34 13 were found necessary due to the mixture of colours in the supraspinatus tendon observed in  
35  
36 14 Phase One.  
37  
38  
39  
40  
41  
42

43  
44 16 In the current study, LWk in the medial and the middle parts of the tendon was 'substantial  
45  
46 17 to almost perfect' when counting the number of yellow/red lesions in both intra-rater and  
47  
48 18 inter-rater reliability. Even though the total agreement was also high in the lateral third of  
49  
50 19 the tendon, LWk was relatively low compared with the medial and the middle parts of the  
51  
52 20 tendon. The reason may be due to the low presence of lesions in the lateral part,  
53  
54 21 corresponding to only 10 % of the participants presenting with lesions in the lateral 1/3 of  
55  
56 22 the tendon, which can lead to the 'Kappa Paradox'.<sup>46</sup> The Kappa Paradox means (in a 2x2  
57  
58 23 table) that an imbalance between presence and absence in overall agreement, and between  
59  
60



1  
2  
3  
4 1 disagreement (bias) can drastically lower the kappa, why prevalence and bias-adjusted  
5  
6 2 kappa (PABAK) in dichotomous scales is recommended.<sup>47</sup> A PABAK on the current number of  
7  
8 3 lesions dichotomised into no lesion /lesion(s) will increase the kappa by up to 70%. Another  
9  
10 4 explanation is that since the pressure is placed vertically on the medial part of the tendon,  
11  
12 5 the lateral part will have experienced a smaller degree of stress.

13  
14  
15  
16 6 The high reliability of the number of focal lesions (LwK intra-rater reliability: 87.5-90, LwK  
17  
18 7 inter-rater reliability: 82.5-90) is in line with a previous study on the supraspinatus tendon  
19  
20 8 where an almost perfect reliability ( $k = 0.83$ ) was found.<sup>14</sup>  
21  
22  
23

24 9  
25  
26 10 The current methods of using colour grading and lesion counts for assessing tendon stiffness  
27  
28 11 in the supraspinatus tendon showed high reliability. These methods are feasible for use in  
29  
30 12 clinical practice as they can be performed quickly, but when more than one clinician is  
31  
32 13 performing the SEL, the method cannot adjust for potentially different transducer pressures.  
33  
34  
35

### 36 14 37 38 15 **Limitations**

39  
40  
41 16 Manual compression may affect reliability, especially when using raw data, colour grading  
42  
43 17 and counting yellow/red lesions. To partly counteract this, a quality bar was used that  
44  
45 18 provided instant feedback on the uniformity of the transducer pressure. Reference tissues  
46  
47 19 (DELT and GEL) with calculation of strain ratios were also used, thereby making a comparison  
48  
49 20 possible between the methods.  
50

51  
52  
53 21 Furthermore, as mentioned, SEL is highly operator-dependent, why the same (and only one)  
54  
55 22 trained operator captured the present images, thereby further decreasing the risk of bias,  
56  
57 23 but this limits the external validity of the results.  
58  
59  
60

1  
2  
3  
4 1 In addition, age was not blinded and, as reported earlier, tendons get softer with age.<sup>48</sup>  
5  
6  
7 2 Therefore, the current blinding of examiner results and health status may not have been  
8  
9 3 sufficient.

10  
11  
12 4

### 13 5 **Strengths**

14  
15  
16 6 The strength of this study was the design, incorporating a stepwise and standardised  
17  
18 7 procedure for reliability which minimised bias and increased reliability.<sup>17</sup> Furthermore, both  
19  
20  
21 8 patients and healthy participants were enrolled.

22  
23  
24 9 To enhance standardisation, all SEL ROIs were measured at a fixed point, just laterally from  
25  
26 10 the anterior-lateral corner of the acromion in the longitudinal plane of the supraspinatus  
27  
28 11 tendon.<sup>20</sup> In addition, the reliability was estimated by using three different quantitative  
29  
30  
31 12 methods (RAW, DELT and GEL), as well as two different qualitative methods (colour and  
32  
33  
34 13 number of yellow/red focal lesions).

1  
2  
3  
4 **1 CONCLUSION**  
5

6  
7 2 Intra-rater and inter-rater reliability were excellent using raw values and ratios with the  
8  
9 3 deltoid muscle as reference tissue, and good when using a gel pad as reference tissue.  
10

11 4 The reliability of colour scale ratings was substantial to almost perfect and the number of  
12  
13  
14 5 lesions was fair to almost perfect.

15  
16 6 Although high reliability was found, validity and responsiveness of these elastographic  
17  
18  
19 7 methods needs further investigation.  
20

21 8  
22  
23  
24  
25  
26  
27  
28  
29  
30  
31  
32  
33  
34  
35  
36  
37  
38  
39  
40  
41  
42  
43  
44  
45  
46  
47  
48  
49  
50  
51  
52  
53  
54  
55  
56  
57  
58  
59  
60

1  
2  
3  
4  
5  
6  
7  
8  
9  
10  
11  
12  
13  
14  
15  
16  
17  
18  
19  
20  
21  
22  
23  
24  
25  
26  
27  
28  
29  
30  
31  
32  
33  
34  
35  
36  
37  
38  
39  
40  
41  
42  
43  
44  
45  
46  
47  
48  
49  
50  
51  
52  
53  
54  
55  
56  
57  
58  
59  
60

### 1 **Contributorship statement**

2 KB, JH, PK, KGI and BJ-K conceived and designed the study protocol. KB and BJ-K procured  
3 the project funding. KB, JH, PK, and BJ-K developed and standardised the ultrasound  
4 procedure. JH, KB and KGI recruited participants.

5 KB was the project coordinator and captured the strain elastography images. KGI performed  
6 the physical tests. KB and JH rated the images. KB and BJ-K planned and coordinated the  
7 statistical analyses. KB performed the statistical analyses. KB drafted the manuscript, and JH,  
8 PK, KGI and BJ-K contributed to the manuscript. All authors read and approved the final  
9 manuscript. KB is the guarantor.

### 11 **Competing interests**

12 The authors declare no conflicts of interest.

### 14 **Funding**

15 This work was supported by the Region of South Denmark (14/38969, 15/24799), The Danish  
16 Rheumatism Association (R150-A4296) and the Danish Council of Radiographers (no grant  
17 number).

### 19 **Data sharing statement**

20 No additional data are available.

22

1  
2  
3  
4  
5  
6  
7  
8  
9  
10  
11  
12  
13  
14  
15  
16  
17  
18  
19  
20  
21  
22  
23  
24  
25  
26  
27  
28  
29  
30  
31  
32  
33  
34  
35  
36  
37  
38  
39  
40  
41  
42  
43  
44  
45  
46  
47  
48  
49  
50  
51  
52  
53  
54  
55  
56  
57  
58  
59  
60  
**REFERENCES**

1. Luime JJ, Koes BW, Hendriksen IJ, et al. Prevalence and incidence of shoulder pain in the general population; a systematic review. *Scand J Rheumatol* 2004;33(2):73-81.
2. Singh SG, Sumit.; Mohammad, F.; Kumar, S.; Kumar, D.; Kumar, S. Prevalence of shoulder disorders in tertiary care centre. *J Res Med Sci* 2015;3(4):917-20.
3. Nyman PP, K.; Panula, H.; Mälkiä, E. Patients' experience of shoulder problems prior to and following intervention. *Physiother Theory Pract* 2012;28(3):221-31.
4. Virta L, Joranger P, Brox JJ, et al. Costs of shoulder pain and resource use in primary health care: a cost-of-illness study in Sweden. *BMC Musculoskelet Disord* 2012;13:17.
5. Teunis T, Lubberts B, Reilly BT, et al. A systematic review and pooled analysis of the prevalence of rotator cuff disease with increasing age. *J Shoulder Elbow Surg* 2014;23(12):1913-21.
6. Klauser AS, Faschingbauer R, Jaschke WR. Is sonoelastography of value in assessing tendons? *Semin Musculoskelet Radiol* 2010;14(3):323-33.
7. Prado-Costa R, Rebelo J, Monteiro-Barroso J, et al. Ultrasound elastography: compression elastography and shear-wave elastography in the assessment of tendon injury. *Insights Imaging* 2018
8. Dietrich CF, Barr RG, Farrokh A, et al. Strain Elastography - How To Do It? *Ultrasound Int Open* 2017;3(4):E137-e49.
9. Garra BS. Elastography: history, principles, and technique comparison. *Abdom Imaging* 2015;40(4):680-97.
10. Chung SW, Kim JY, Yoon JP, et al. Arthroscopic repair of partial-thickness and small full-thickness rotator cuff tears: tendon quality as a prognostic factor for repair integrity. *Am J Sports Med* 2015;43(3):588-96.
11. Bamber J, Cosgrove D, Dietrich CF, et al. EFSUMB guidelines and recommendations on the clinical use of ultrasound elastography. Part 1: Basic principles and technology. *Ultraschall Med* 2013;34(2):169-84.
12. Fusini F, Langella F, Busilacchi A, et al. Real-time sonoelastography: principles and clinical applications in tendon disorders. A systematic review. *Muscles Ligaments Tendons J* 2017;7(3):467-77.
13. Lee SU, Joo SY, Kim SK, et al. Real-time sonoelastography in the diagnosis of rotator cuff tendinopathy. *J Shoulder Elbow Surg* 2016;25(5):723-9.
14. Seo JB, Yoo JS, Ryu JW. Sonoelastography findings of supraspinatus tendon in rotator cuff tendinopathy without tear: comparison with magnetic resonance images and conventional ultrasonography. *J Ultrasound* 2015;18(2):143-9.

1  
2  
3  
4  
5  
6  
7  
8  
9  
10  
11  
12  
13  
14  
15  
16  
17  
18  
19  
20  
21  
22  
23  
24  
25  
26  
27  
28  
29  
30  
31  
32  
33  
34  
35  
36  
37  
38  
39  
40  
41  
42  
43  
44  
45  
46  
47  
48  
49  
50  
51  
52  
53  
54  
55  
56  
57  
58  
59  
60

15. Tudisco C, Bisicchia S, Stefanini M, et al. Tendon quality in small unilateral supraspinatus tendon tears. Real-time sonoelastography correlates with clinical findings. *Knee Surg Sports Traumatol Arthrosc* 2013
16. Muraki T, Ishikawa H, Morise S, et al. Ultrasound elastography-based assessment of the elasticity of the supraspinatus muscle and tendon during muscle contraction. *J Shoulder Elbow Surg* 2015;24(1):120-6.
17. Patijn J. Reproducibility and Validity Studies of Diagnostic Procedures in Manual/Musculoskeletal Medicine 2004.
18. Kottner J, Audige L, Brorson S, et al. Guidelines for Reporting Reliability and Agreement Studies (GRRAS) were proposed. *J Clin Epidemiol* 2011;64(1):96-106.
19. Hougs Kjaer BPM, Ellegaard KPP, Wieland IP, et al. Intra-rater and inter-rater reliability of the standardized ultrasound protocol for assessing subacromial structures. *Physiother Theory Pract* 2017;33(5):398-409.
20. Ingwersen KG, Hjarbæk J, Eshøj H, et al. Ultrasound assessment for grading structural tendon changes in supraspinatus tendinopathy: an inter-rater reliability study. *B M J Open* 2016;6(5)
21. Sein ML, Walton J, Linklater J, et al. Reliability of MRI assessment of supraspinatus tendinopathy. *Br J Sports Med* 2007;41(8):e9.
22. De Zordo T, Fink C, Feuchtner GM, et al. Real-time sonoelastography findings in healthy Achilles tendons. *AJR Am J Roentgenol* 2009;193(2):W134-8.
23. Cosgrove D, Piscaglia F, Bamber J, et al. EFSUMB guidelines and recommendations on the clinical use of ultrasound elastography. Part 2: Clinical applications. *Ultraschall Med* 2013;34(3):238-53.
24. Niitsu M, Michizaki A, Endo A, et al. Muscle hardness measurement by using ultrasound elastography: a feasibility study. *Acta Radiol* 2011;52(1):99-105.
25. Drakonaki EE, Allen GM, Wilson DJ. Real-time ultrasound elastography of the normal Achilles tendon: reproducibility and pattern description. *Clin Radiol* 2009;64(12):1196-202.
26. Lumsdaine W, Smith A, Walker RG, et al. Morphology of the humeral insertion of the supraspinatus and infraspinatus tendons: Application to rotator cuff repair. *Clin Anat* 2015;28(6):767-73.
27. Curtis AS, Burbank KM, Tierney JJ, et al. The insertional footprint of the rotator cuff: an anatomic study. *Arthroscopy* 2006;22(6):609.e1.
28. De Zordo T, Lill SR, Fink C, et al. Real-time sonoelastography of lateral epicondylitis: comparison of findings between patients and healthy volunteers. *AJR Am J Roentgenol* 2009;193(1):180-5.
29. Klauser AS, Miyamoto H, Tamegger M, et al. Achilles tendon assessed with sonoelastography: histologic agreement. *Radiology* 2013;267(3):837-42.

- 1  
2  
3  
4  
5 1  
6 2 30. Sconfienza LM, Silvestri E, Cimmino MA. Sonoelastography in the evaluation of painful  
7 3 Achilles tendon in amateur athletes. *Clin Exp Rheumatol* 2010;28(3):373-8.  
8 4  
9 5 31. Turan A, Tufan A, Mercan R, et al. Real-time sonoelastography of Achilles tendon in patients  
10 6 with ankylosing spondylitis. *Skeletal Radiol* 2013;42(8):1113-8.  
11 7  
12 8 32. Kitis A, Celik E, Aslan UB, et al. DASH questionnaire for the analysis of musculoskeletal  
13 9 symptoms in industry workers: a validity and reliability study. *Appl Ergon* 2009;40(2):251-5.  
14 10  
15 11 33. Boonstra AM, Schiphorst Preuper HR, Reneman MF, et al. Reliability and validity of the visual  
16 12 analogue scale for disability in patients with chronic musculoskeletal pain. *Int J Rehabil Res*  
17 13 2008;31(2):165-9.  
18 14  
19 15 34. Norman R, Cronin P, Viney R, et al. International comparisons in valuing EQ-5D health states:  
20 16 a review and analysis. *Value Health* 2009;12(8):1194-200.  
21 17  
22 18 35. Shrout PE, Fleiss JL. Intraclass correlations: uses in assessing rater reliability. *Psychol Bull*  
23 19 1979;86(2):420-8.  
24 20  
25 21 36. Cicchetti D. Guidelines, Criteria, and Rules of Thumb for Evaluating Normed and Standardized  
26 22 Assessment Instrument in Psychology. *Psychol Assess* 1994;6(4):284-90.  
27 23  
28 24 37. Bland JM, Altman DG. Statistical methods for assessing agreement between two methods of  
29 25 clinical measurement. *Lancet* 1986;1(8476):307-10.  
30 26  
31 27 38. Ottenbacher KJ, Stull GA. The analysis and interpretation of method comparison studies in  
32 28 rehabilitation research. *Am J Phys Med Rehabil* 1993;72(5):266-71.  
33 29  
34 30 39. de Vet HCW, Terwee CB, Knol DL, et al. When to use agreement versus reliability measures. *J*  
35 31 *Clin Epidemiol* 2006;59(10):1033-9.  
36 32  
37 33 40. de Vet HCW, Terwee CB, Knol DL, et al. Measurements in Medicine - a practical guide. New  
38 34 York, USA: Cambridge University Press 2011.  
39 35  
40 36 41. Landis RJK, G.G. The Measurement of Observer Agreement for Categorical Data. *Biometrics*  
41 37 1977;33(1):159-74.  
42 38  
43 39 42. Busilacchi A, Olivieri M, Ulisse S, et al. Real-time sonoelastography as novel follow-up  
44 40 method in Achilles tendon surgery. *Knee Surg Sports Traumatol Arthrosc* 2014  
45 41  
46 42 43. Ooi CC, Schneider ME, Malliaras P, et al. Diagnostic performance of axial-strain  
47 43 sonoelastography in confirming clinically diagnosed Achilles tendinopathy: comparison with  
48 44 B-mode ultrasound and color Doppler imaging. *Ultrasound Med Biol* 2015;41(1):15-25.  
49 45  
50 46 44. Yamamoto Y, Yamaguchi S, Sasho T, et al. Quantitative Ultrasound Elastography With an  
51 47 Acoustic Coupler for Achilles Tendon Elasticity: Measurement Repeatability and Normative  
52 48 Values. *J Ultrasound Med* 2016;35(1):159-66.  
53 49  
54  
55  
56  
57  
58  
59  
60

1  
2  
3  
4  
5  
6  
7  
8  
9  
10  
11  
12  
13  
14  
15  
16  
17  
18  
19  
20  
21  
22  
23  
24  
25  
26  
27  
28  
29  
30  
31  
32  
33  
34  
35  
36  
37  
38  
39  
40  
41  
42  
43  
44  
45  
46  
47  
48  
49  
50  
51  
52  
53  
54  
55  
56  
57  
58  
59  
60

- 1 45. Akkaya S, Akkaya N, Agladioglu K, et al. Real-time elastography of patellar tendon in patients  
2 with auto-graft bone-tendon-bone anterior cruciate ligament reconstruction. *Archives of*  
3 *Orthopaedic and Trauma Surgery* 2016;136(6):837-42.  
4  
5 46. Feinstein AR, Cicchetti DV. High agreement but low kappa: I. The problems of two paradoxes.  
6 *J Clin Epidemiol* 1990;43(6):543-9.  
7  
8 47. Byrt T, Bishop J, Carlin JB. Bias, prevalence and kappa. *J Clin Epidemiol* 1993;46(5):423-9.  
9  
10 48. Hsiao MY, Chen YC, Lin CY, et al. Reduced patellar tendon elasticity with aging: In vivo  
11 assessment by shear wave elastography. *Ultrasound Med. Biol.* 2015;41(11):2899-905.  
12  
13

For peer review only



1  
2  
3  
4 **1 Figure legends**  
5

6  
7 2

8  
9 3 Figure 1

10  
11 4 With the arm located behind the back and the elbow flexed at 90° and the palm facing  
12  
13 5 posteriorly, the probe was placed just laterally from the anterior-lateral corner of the  
14  
15 6 acromion in the longitudinal plane of the supraspinatus tendon.  
16  
17

18  
19 7

20  
21 8 Figure 2

22  
23 9 Left side: For measuring elastography characteristics of the supraspinatus tendon, the  
24  
25 10 tendon was split into three parts (3 x 7.7mm), illustrated by the areas of blue, red and green  
26  
27 11 colours. This division was based on a line from the lateral tendon insertion (greater tubercle)  
28  
29 12 to the medial tendon insertion, corresponding to 6.5 mm, and from there a line of 23 mm to  
30  
31 13 the medial tendon with the end point (medial part) being perpendicular to the superior  
32  
33 14 surface of the tendon.  
34  
35

36  
37 15 The yellow circle in the soft part of the deltoid muscle is used as the reference tissue.

38  
39 16 Right side: The three measurement areas (ROIs) and one reference area with elastography  
40  
41 17 characteristics (raw data) during the time of measurement.  
42  
43  
44

45  
46 18

47  
48 19 Figure 3

49  
50 20 Left side: Gel pad (mounted on the transducer with a condom used as the other reference  
51  
52 21 area, yellow circle). Right side: The corresponding elastography image/measurements.  
53  
54

55  
56 22

57  
58 23  
59  
60

1  
2  
3  
4 1 Figure 4  
5

6  
7 2 A 6.5 mm chord was drawn (in a lateral direction) from the medial part of the insertion on  
8  
9 3 the humeral head to the lateral part of the tuberculum major. This fixed point (end of the  
10  
11 4 line at the lateral part of the insertion) was used to draw a 23 mm (7.7 x 3) horizontal line in  
12  
13  
14 5 a medial direction ensuring agreement of measuring area.  
15  
16

17 6  
18  
19 7 Figure 5  
20

21 8 Bland-Altman plots with 95% Limits of Agreement for measurements, using respectively raw  
22  
23  
24 9 data, the deltoid muscle and a gel pad as reference areas. Values are based on the mean of  
25  
26 10 the three measured parts across the supraspinatus tendon.  
27  
28  
29  
30  
31  
32  
33  
34  
35  
36  
37  
38  
39  
40  
41  
42  
43  
44  
45  
46  
47  
48  
49  
50  
51  
52  
53  
54  
55  
56  
57  
58  
59  
60

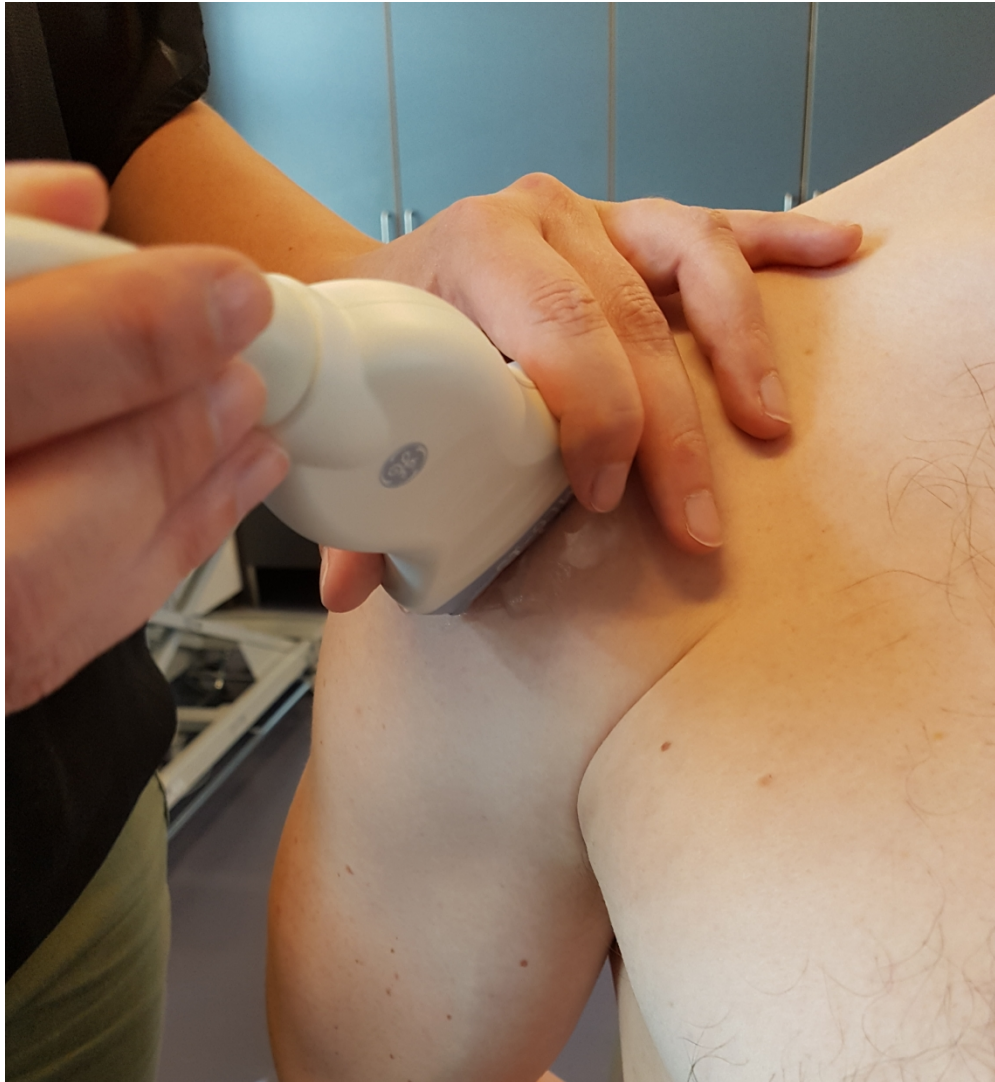

With the arm located behind the back and the elbow flexed 90° with the palm facing towards the posterior direction, the probe is placed just laterally from the anterior-lateral corner of the acromion in the longitudinal plane of the supraspinatus tendon.



Left side: For measuring elastography characteristics of the supraspinatus tendon, the tendon was split into 3 parts (3x7.7mm), illustrated by the areas of blue, red and green colors. This division was based on a line from the lateral tendon insertion (tuberculum majus) to the medial tendon insertion part, corresponding to 6.5 mm, and from there a line of 23 mm to the medial tendon part with the end point (medial part) being perpendicular to the superior surface of the tendon.

The yellow circle in the soft part of the deltoid muscle is used as a reference.

Right side: The three measurements areas (ROI's) and one reference area with elastography characteristics (raw data) during the time of measurement.

451x254mm (72 x 72 DPI)

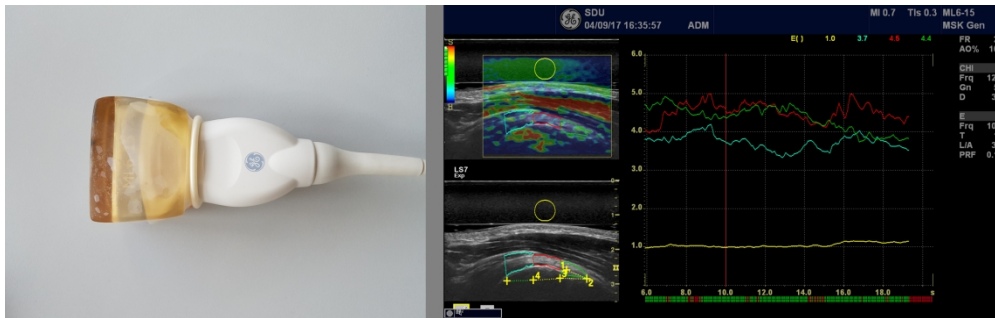

Left side: Gel pad (mounted on the transducer with a condom used as the other reference area, yellow circle). Right side: The corresponding elastography image/measurements.

1  
2  
3  
4  
5  
6  
7  
8  
9  
10  
11  
12  
13  
14  
15  
16  
17  
18  
19  
20  
21  
22  
23  
24  
25  
26  
27  
28  
29  
30  
31  
32  
33  
34  
35  
36  
37  
38  
39  
40  
41  
42  
43  
44  
45  
46  
47  
48  
49  
50  
51  
52  
53  
54  
55  
56  
57  
58  
59  
60

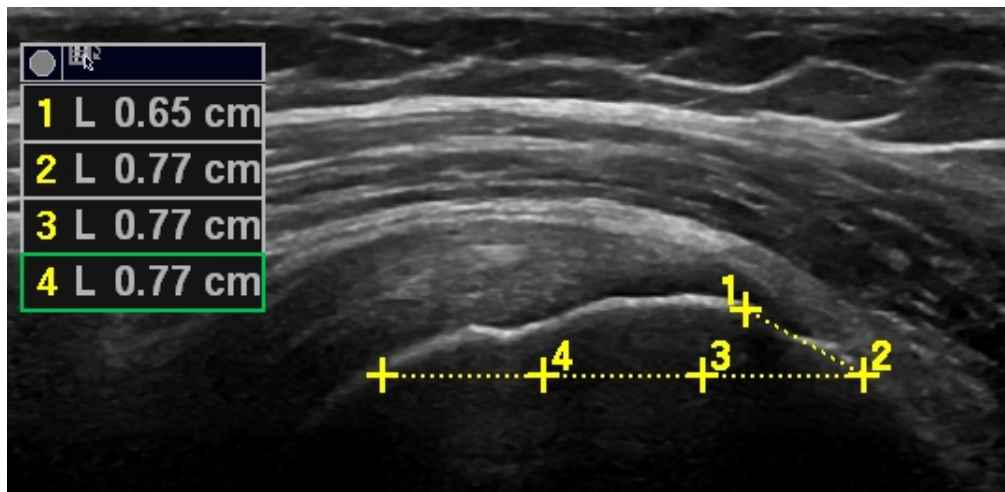

A 6.5 mm chord was drawn (in the lateral direction) from the medial part of the insertion on the humeral head to the lateral part of the tuberculum major. This fix point (end of the line at the lateral part of the insertion) was used to draw a 23 mm (7.7 x 3) horizontal line in the medial direction ensuring agreement of measuring area.

1  
2  
3  
4  
5  
6  
7  
8  
9  
10  
11  
12  
13  
14  
15  
16  
17  
18  
19  
20  
21  
22  
23  
24  
25  
26  
27  
28  
29  
30  
31  
32  
33  
34  
35  
36  
37  
38  
39  
40  
41  
42  
43  
44  
45  
46  
47  
48  
49  
50  
51  
52  
53  
54  
55  
56  
57  
58  
59  
60



Bland-Altman plots with 95% Limits of Agreement for measurements, using respectively raw data, the deltoid muscle and a gel pad as reference areas. Values are based on the mean of the three measured parts across the supraspinatus tendon.

STROBE Statement—Checklist of items that should be included in reports of *cohort studies*

|                              | Item No | Recommendation                                                                                                                                                                                                                                                                                                         |
|------------------------------|---------|------------------------------------------------------------------------------------------------------------------------------------------------------------------------------------------------------------------------------------------------------------------------------------------------------------------------|
| <b>Title and abstract</b>    | 1       | (a) Indicate the study's design with a commonly used term in the title or the abstract ( <b>p. 1, l. 1</b> )<br>(b) Provide in the abstract an informative and balanced summary of what was done and what was found ( <b>p. 2, l. 1</b> )                                                                              |
| <b>Introduction</b>          |         |                                                                                                                                                                                                                                                                                                                        |
| Background/rationale         | 2       | Explain the scientific background and rationale for the investigation being reported ( <b>p. 4, l. 1</b> )                                                                                                                                                                                                             |
| Objectives                   | 3       | State specific objectives, including any prespecified hypotheses ( <b>p. 6, l. 11</b> )                                                                                                                                                                                                                                |
| <b>Methods</b>               |         |                                                                                                                                                                                                                                                                                                                        |
| Study design                 | 4       | Present key elements of study design early in the paper ( <b>p. 7, l. 2</b> )                                                                                                                                                                                                                                          |
| Setting                      | 5       | Describe the setting, locations, and relevant dates, including periods of recruitment, exposure, follow-up, and data collection ( <b>p. 7, l. 14</b> )                                                                                                                                                                 |
| Participants                 | 6       | (a) Give the eligibility criteria, and the sources and methods of selection of participants. Describe methods of follow-up ( <b>p. 8, l. 1</b> )<br>(b) For matched studies, give matching criteria and number of exposed and unexposed                                                                                |
| Variables                    | 7       | Clearly define all outcomes, exposures, predictors, potential confounders, and effect modifiers. Give diagnostic criteria, if applicable ( <b>p. 10, l. 19</b> )                                                                                                                                                       |
| Data sources/<br>measurement | 8*      | For each variable of interest, give sources of data and details of methods of assessment (measurement). Describe comparability of assessment methods if there is more than one group ( <b>p. 10, l. 19</b> )                                                                                                           |
| Bias                         | 9       | Describe any efforts to address potential sources of bias ( <b>p. 6, l. 1 &amp; p. 11, l. 16</b> )                                                                                                                                                                                                                     |
| Study size                   | 10      | Explain how the study size was arrived at ( <b>p. 4, l. 5</b> )                                                                                                                                                                                                                                                        |
| Quantitative variables       | 11      | Explain how quantitative variables were handled in the analyses. If applicable, describe which groupings were chosen and why ( <b>p. 13, l. 16</b> )                                                                                                                                                                   |
| Statistical methods          | 12      | (a) Describe all statistical methods, including those used to control for confounding<br>(b) Describe any methods used to examine subgroups and interactions<br>(c) Explain how missing data were addressed<br>(d) If applicable, explain how loss to follow-up was addressed<br>(e) Describe any sensitivity analyses |
| <b>Results</b>               |         |                                                                                                                                                                                                                                                                                                                        |
| Participants                 | 13*     | (a) Report numbers of individuals at each stage of study—eg numbers potentially eligible, examined for eligibility, confirmed eligible, included in the study, completing follow-up, and analysed<br>(b) Give reasons for non-participation at each stage<br>(c) Consider use of a flow diagram                        |
| Descriptive data             | 14*     | (a) Give characteristics of study participants (eg demographic, clinical, social) and information on exposures and potential confounders ( <b>p. 15, l. 5</b> )<br>(b) Indicate number of participants with missing data for each variable of interest<br>(c) Summarise follow-up time (eg, average and total amount)  |
| Outcome data                 | 15*     | Report numbers of outcome events or summary measures over time                                                                                                                                                                                                                                                         |
| Main results                 | 16      | (a) Give unadjusted estimates and, if applicable, confounder-adjusted estimates and their precision (eg, 95% confidence interval). Make clear which confounders were adjusted for and why they were included<br>(b) Report category boundaries when continuous variables were categorized                              |



|                          |    |                                                                                                                                                                                                    |
|--------------------------|----|----------------------------------------------------------------------------------------------------------------------------------------------------------------------------------------------------|
|                          |    | (c) If relevant, consider translating estimates of relative risk into absolute risk for a meaningful time period                                                                                   |
| Other analyses           | 17 | Report other analyses done—eg analyses of subgroups and interactions, and sensitivity analyses                                                                                                     |
| <b>Discussion</b>        |    |                                                                                                                                                                                                    |
| Key results              | 18 | Summarise key results with reference to study objectives ( <b>p. 20, l. 1</b> )                                                                                                                    |
| Limitations              | 19 | Discuss limitations of the study, taking into account sources of potential bias or imprecision. Discuss both direction and magnitude of any potential bias ( <b>p. 24, l. 16</b> )                 |
| Interpretation           | 20 | Give a cautious overall interpretation of results considering objectives, limitations, multiplicity of analyses, results from similar studies, and other relevant evidence ( <b>p. 20, l. 18</b> ) |
| Generalisability         | 21 | Discuss the generalisability (external validity) of the study results                                                                                                                              |
| <b>Other information</b> |    |                                                                                                                                                                                                    |
| Funding                  | 22 | Give the source of funding and the role of the funders for the present study and, if applicable, for the original study on which the present article is based ( <b>p. 27, l. 1</b> )               |

\*Give information separately for exposed and unexposed groups.

**Note:** An Explanation and Elaboration article discusses each checklist item and gives methodological background and published examples of transparent reporting. The STROBE checklist is best used in conjunction with this article (freely available on the Web sites of PLoS Medicine at <http://www.plosmedicine.org/>, Annals of Internal Medicine at <http://www.annals.org/>, and Epidemiology at <http://www.epidem.com/>). Information on the STROBE Initiative is available at <http://www.strobe-statement.org>.

# BMJ Open

## ULTRASONIC STRAIN ELASTOGRAPHY FOR DETECTING ABNORMALITIES IN THE SUPRASPINATUS TENDON: AN INTRA- AND INTER-RATER RELIABILITY STUDY

|                                 |                                                                                                                                                                                                                                                                                                                                                                                                                                                                                                         |
|---------------------------------|---------------------------------------------------------------------------------------------------------------------------------------------------------------------------------------------------------------------------------------------------------------------------------------------------------------------------------------------------------------------------------------------------------------------------------------------------------------------------------------------------------|
| Journal:                        | <i>BMJ Open</i>                                                                                                                                                                                                                                                                                                                                                                                                                                                                                         |
| Manuscript ID                   | bmjopen-2018-027725.R2                                                                                                                                                                                                                                                                                                                                                                                                                                                                                  |
| Article Type:                   | Research                                                                                                                                                                                                                                                                                                                                                                                                                                                                                                |
| Date Submitted by the Author:   | 09-Apr-2019                                                                                                                                                                                                                                                                                                                                                                                                                                                                                             |
| Complete List of Authors:       | Brage, K; University of Southern Denmark, Sport Science and Clinical Biomechanics<br>Hjarbaek, John; Odense Universitetshospital, Department of Radiology, Musculoskeletal section<br>Kjaer, Per ; University of Southern Denmark, Institute of Sports Science and Clinical Biomechanics<br>Ingwersen, Kim G.; Sports Science and Clinical Biomechanics<br>Juul-Kristensen, Birgit; Research Unit for Musculoskeletal Function and Physiotherapy, Institute of Sports Science and Clinical Biomechanics |
| <b>Primary Subject Heading</b>: | Radiology and imaging                                                                                                                                                                                                                                                                                                                                                                                                                                                                                   |
| Secondary Subject Heading:      | Diagnostics                                                                                                                                                                                                                                                                                                                                                                                                                                                                                             |
| Keywords:                       | Strain elastography, supraspinatus tendon, rotator cuff, tendon quality, reliability, tendinopathy                                                                                                                                                                                                                                                                                                                                                                                                      |
|                                 |                                                                                                                                                                                                                                                                                                                                                                                                                                                                                                         |

SCHOLARONE™  
Manuscripts

1  
2  
3  
4 1 **ULTRASONIC STRAIN ELASTOGRAPHY FOR DETECTING ABNORMALITIES IN THE SUPRASPINATUS**  
5 2 **TENDON: AN INTRA- AND INTER-RATER RELIABILITY STUDY**  
6 3  
7 4  
8 5  
9 6

10 6 Brage K<sup>1,2</sup>, Hjarbaek J<sup>3</sup>, Kjaer P<sup>1,2</sup>, Ingwersen KG<sup>4</sup>, Juul-Kristensen B<sup>1</sup>  
11 7

12 8 <sup>1</sup> Department of Sports Science and Clinical Biomechanics, University of Southern Denmark,  
13 9 Campusvej 55, 5230 Odense M, DK

14 10 <sup>2</sup> UCL University College, Niels Bohrs Allé 1, 5230, Odense M, DK

15 11 <sup>3</sup> Department of Radiology, Odense University Hospital, J. B. Winsløws Vej 4, 5000 Odense C, DK

16 12 <sup>4</sup> Research Unit in Physiotherapy and Occupational Therapy, Hospital Lillebaelt, Kabbeltoft 25, 7100  
17 13 Vejle, DK  
18 14  
19 15

20 16 **Author information**

21 17 *Corresponding Author*

22 18 Karen Brage, PhD candidate, Telephone: +45 51787381, fax: 6318 3226, e-mail: kabr2@ucl.dk

23 19 *Co-Authors*

24 20 John Hjarbaek, MD, Telephone: +45 66113333, e-mail: john.hjarbaek@rsyd.dk

25 21 Per Kjaer, Professor, PhD., Telephone: +45 65504553, e-mail: pkjaer@health.sdu.dk

26 22 Kim Gordon Ingwersen, PhD., Telephone: +45 65509044, e-mail: kingwersen@health.sdu.dk

27 23 Birgit Juul-Kristensen, PhD.: Telephone: +45 65503412, e-mail: bjuul-kristensen@health.sdu.dk  
28 24  
29 25

30 26 **Wordcount**

31 27 4404  
32 28  
33 29

34 30 **Trial registration**

35 31 The study protocol was approved by the Ethics Committee for the Region of South Denmark (S-  
36 32 20160115) and reported to the Danish Data Protection Agency (2014-41-3266).  
37 33  
38  
39  
40  
41  
42  
43  
44  
45  
46  
47  
48  
49  
50  
51  
52  
53  
54  
55  
56  
57  
58  
59  
60

1  
2  
3  
4 1 ABSTRACT

5  
6  
7 2 **Objectives**

8  
9 3 The reliability of ultrasonic strain elastography (SEL) used to detect abnormalities in the  
10  
11 4 supraspinatus tendon is unclear. Thus, the aim of this study was to investigate the reliability of SEL  
12  
13  
14 5 in the supraspinatus tendon.  
15

16 6  
17  
18  
19 7 **Design**

20  
21 8 An intra-rater and inter-rater reliability study.  
22  
23

24 9  
25  
26 10 **Setting**

27  
28  
29 11 A single-centre study conducted at the University of Southern Denmark.  
30  
31 12

32  
33  
34 13 **Participants**

35  
36 14 Twenty participants with shoulder pain and MRI-verified supraspinatus tendinosis and 20  
37  
38 15 asymptomatic participants (no MRI).  
39  
40  
41 16

42  
43 17 **Primary and secondary outcome measures**

44  
45  
46 18 Raw values (RAW), and ratios (deltoid muscle (DEL); gel pad (GEL) as reference tissues) were  
47  
48 19 calculated and mean values of measurements from three regions of the supraspinatus tendon  
49  
50  
51 20 were reported. Colour scale ratings and number of yellow/red lesions from the three areas were  
52  
53 21 also included.  
54  
55

56 22  
57  
58 23 **Results**  
59  
60

1  
2  
3  
4 1 Intra-rater reliability showed Intra-Class Correlation Coefficients (ICCs) for RAW, DELT and GEL:  
5  
6  
7 2 0.97 (Minimal Detectable Change (MDC): 0.28 (6.36% of the mean); 0.89 (MDC: 2.91 (20.37%); and  
8  
9 3 0.73 (MDC: 1.61 (58.82%)), respectively. The ICCs for inter-rater reliability were 0.89 (MDC: 0.47  
10  
11 4 (10.53%); 0.78 (MDC: 3.69 (25.51%); and 0.70 (MDC: 1.75 (62.63%)), respectively.  
12  
13  
14 5 For colour scale ratings, intra-rater reliability (Linear Weighted kappa, LWk) ranged from 0.76 to  
15  
16 6 0.79, with the inter-rater reliability from 0.71 to 0.81. For the number of lesions, intra-rater  
17  
18 7 reliability ranged from 0.40 to 0.82, and inter-rater reliability from 0.24 to 0.67.  
19  
20  
21 8

## 23 9 **Conclusions**

24  
25  
26 10 Intra-rater and inter-rater reliability were excellent for raw values and for ratios with deltoid  
27  
28 11 muscle as the reference tissue, and good for ratios with gel pad as the reference tissue. The  
29  
30 12 reliability of colour scale ratings was substantial to almost perfect, and for the number of lesions  
31  
32 13 fair to almost perfect.  
33  
34

35  
36 14 Although high reliability was found, validity and responsiveness of these elastographic methods  
37  
38 15 needs further investigation.  
39  
40  
41 16

## 43 17 **Strengths and limitations of this study**

- 44  
45  
46 18 • Standardised procedure for capturing strain elastographic images was developed and applied
- 47  
48 19 • Raw values of strain elastographic images were presented
- 49  
50  
51 20 • Ratios, based on different reference tissues or areas (deltoid muscle/gel pad), of strain  
52  
53 21 elastographic images were calculated and presented
- 54  
55  
56 22 • Specific procedures for colour grading strain elastographic images were presented
- 57  
58 23 • SEL is highly operator-dependent which may limit the external validity
- 59  
60

## 1 INTRODUCTION

2 Shoulder pain is a common symptom, with a lifetime prevalence in the general population of 6.7-  
3 66.7%<sup>1</sup> and subacromial pain syndrome is the second most common cause of pain in the  
4 shoulder.<sup>2</sup> Shoulder pain has consequences such as physical limitations, mental problems<sup>3</sup> and  
5 absence from work.<sup>4</sup>

6  
7 Shoulder disorders are evaluated by history-taking and physical examination, potentially  
8 supplemented with X-ray, conventional ultrasound and/or Magnetic Resonance Imaging (MRI).  
9 However, supraspinatus tendon abnormalities are also found in asymptomatic people when using  
10 general modalities such as MRI and ultrasound.<sup>5</sup> Furthermore, it seems difficult to distinguish  
11 pathological changes from healthy tissues by using conventional ultrasound because pathological  
12 regions often exhibit the same echogenicity as non-pathological regions.<sup>6</sup>

13  
14 Strain elastography (SEL) is a relatively new and not yet well-established method, which may assist  
15 in diagnosis, prediction and monitoring of progress in tendon healing.<sup>7</sup>

16 SEL defines the physical properties of soft tissues through characterisation of the differences in  
17 stiffness between 'the regions of interest' (ROI) and the surrounding tissues.<sup>8,9</sup> Conventional  
18 ultrasound and MRI were developed for visualisation of macroscopic changes and not specifically  
19 for the mechanical tendon properties, which is why SEL may add further knowledge to  
20 conventional shoulder imaging. Since tendon quality is a prognostic factor for rotator cuff repair,  
21 information about tendon stiffness could be beneficial for the surgeon.<sup>10</sup>

22 Tissue deformation using SEL is obtained by uniform mechanically induced compressions (strain)  
23 of the structures under the ultrasound transducer, during the ultrasound scan. Through manual

1  
2  
3  
4  
5  
6  
7  
8  
9  
10  
11  
12  
13  
14  
15  
16  
17  
18  
19  
20  
21  
22  
23  
24  
25  
26  
27  
28  
29  
30  
31  
32  
33  
34  
35  
36  
37  
38  
39  
40  
41  
42  
43  
44  
45  
46  
47  
48  
49  
50  
51  
52  
53  
54  
55  
56  
57  
58  
59  
60

1 compression, the soft tissue deforms differently depending on its inherent stiffness. The degree of  
2 deformation can be interpreted as an estimate of the tissue stiffness.<sup>11</sup>

3  
4 SEL has recently been used in the musculoskeletal area, where the achilles tendon has been the  
5 primary focus.<sup>12</sup> A few studies have found significant associations between pathology identified by  
6 SEL and MRI in patients with supraspinatus tendinopathy,<sup>13 14</sup> besides significant correlations  
7 between results from SEL and clinical tests and questionnaires in patients with small supraspinatus  
8 tendon tears.<sup>15</sup> One study also found SEL to be able to detect increased stiffness in the  
9 supraspinatus tendon elasticity and muscle elasticity with increased muscle contraction in healthy  
10 participants.<sup>16</sup> Although only a few studies have been performed, and with different aims,  
11 comparator instruments, procedures, reference tissues and data types, the concurrent validity of  
12 SEL in the supraspinatus tendon seems promising.<sup>13-16</sup>

13  
14 However, the reliability of SEL must first be proven to be acceptable. In this respect, SEL  
15 constitutes several challenges since SEL is a technique with relatively high operator dependency in  
16 terms of the manually applied pressure and subsequent identification and selection of the  
17 pathological ROI.

18 One of only two reliability studies found the inter-rater reliability of SEL in the supraspinatus  
19 tendon to be almost perfect ( $\kappa = 0.83$ ) with respect to the number of focal lesions in 118 patients  
20 with MRI-verified supraspinatus tendinopathy.<sup>14</sup> However, this study did not include a healthy  
21 control group which is recommended for reliability and validity studies, to achieve realistic tissue  
22 variation.<sup>17</sup> Furthermore, the study used only colour quantification.<sup>14</sup> The other study found a high  
23 intra-rater reliability ( $ICC_{1,3} = 0.92-0.99$ ) with respect to ROI, when using an acoustic coupler as

1  
2  
3  
4 1 the reference tissue in a small sample of 23 healthy participants. The limitations of this study  
5  
6  
7 2 were: not including a group with pathology, not defining ROI and only using one type of reference  
8  
9 3 tissue (acoustic coupler).<sup>16</sup> Since standardised and consensus procedures for conducting  
10  
11 4 elastography in the supraspinatus tendon have not yet been established, there is a need to  
12  
13  
14 5 investigate which reference tissue has the highest reliability. To our knowledge, there has not  
15  
16 6 been a study investigating the reliability of SEL in the supraspinatus tendon that has included both  
17  
18  
19 7 patients with a pathological (non-ruptured) supraspinatus tendon and healthy participants with  
20  
21 8 non-painful shoulders. Furthermore, choice of reference tissue and quantification methods has  
22  
23  
24 9 major impact on results, but no reliability studies have compared these different approaches.  
25  
26  
27 10

28  
29 11 The aim of this study was to test the intra-rater and inter-rater reliability of SEL within the  
30  
31 12 supraspinatus tendon in patients and healthy participants, using different reference tissues  
32  
33 13 (deltoid muscle (DELTA), gel pad (GEL)), and different quantification methods (raw data, strain  
34  
35 14 ratios, colour scale rating and counting number of yellow/red lesions).  
36  
37  
38 15  
39  
40  
41 16  
42  
43 17  
44  
45  
46  
47  
48  
49  
50  
51  
52  
53  
54  
55  
56  
57  
58  
59  
60



## 1 MATERIALS AND METHODS

2 This study was an intra-rater and inter-rater reliability study of SEL, used on the supraspinatus  
3 tendon, reported according to the Guidelines for Reporting Reliability and Agreement Studies  
4 (GRRAS).<sup>18</sup>

5  
6 A three-phased intra-rater and inter-rater reliability protocol for diagnostic reliability studies was  
7 used.<sup>17</sup> The protocol included a training phase (Phase One), an overall agreement phase (Phase  
8 Two), and an actual study phase (Phase Three), for securing low clinician dependency and  
9 subjectivity, sufficient experience and standardisation, and minimisation of systematic bias.<sup>17</sup> In  
10 order to progress to the study phase, the criterion of at least 80% inter-rater agreement in Phase  
11 Two was used. Such a protocol has previously been used in reliability studies, using ultrasound  
12 methods.<sup>19 20</sup>

### 14 Study procedures

15 The study's participants were recruited from August 2016 to December 2017. Symptomatic  
16 participants, with an MRI-verified supraspinatus tendinosis (*patients*), were recruited from the  
17 Radiology Department at Odense University Hospital within 14 days of their MRI examination.  
18 Participants with no shoulder symptoms (*healthy participants*) were recruited primarily from the  
19 University of Southern Denmark and the UCL University College, both situated in Odense. Except  
20 for MRI, all the procedures were performed at the University of Southern Denmark. After  
21 inclusion, participants underwent clinical tests (performed by KGI) and filled out questionnaires  
22 regarding functional limitations, pain and quality of life. Testing procedures took place once and  
23 lasted approximately one hour.

1  
2  
3  
4 1 All SEL images were captured by the same clinician (KB), while two raters performed the SEL  
5  
6  
7 2 measurements on the captured images. Rater 1 (KB), radiographer, was thoroughly trained in  
8  
9  
10 3 using SEL on the shoulder by Rater 2 (JH), radiologist, who had more than 20 years' experience in  
11  
12 4 clinical musculoskeletal ultrasound. In Phase Three, the raters were blinded to each other's results  
13  
14 5 (data were stored separately), the participants' health status (Rater 1 entered the room after  
15  
16  
17 6 clinical tests and questionnaires were performed, and Rater 2 had no contact with the  
18  
19 7 participants) and their MRI results (ID-numbers were changed after MRI examinations).  
20  
21  
22 8

23  
24 9 SEL images were stored for at least 14 days after image capturing until the first image assessment,  
25  
26  
27 10 to ensure elimination of any memory of pain response during SEL by Rater 1. Further, all SEL  
28  
29  
30 11 images were stored for an additional 14 days before Rater 1's second assessment, to ensure  
31  
32 12 elimination of recalls of SEL results from the first assessment.  
33  
34 13

35  
36 14 The study protocol was approved by the Ethics Committee for the Region of South Denmark (S-  
37  
38  
39 15 20160115) and reported to the Danish Data Protection Agency (2014-41-3266). All participants  
40  
41  
42 16 had oral and written information about the study and signed an informed consent form before  
43  
44 17 participation in this study.  
45  
46 18

## 47 48 19 **Patient and Public Involvement**

49  
50  
51 20 Patients and the public were not involved in the design or planning of the study.  
52  
53 21

## 54 55 22 **Participants**

56  
57  
58 23 *Inclusion and exclusion criteria*  
59  
60

1  
2  
3  
4  
5  
6  
7  
8  
9  
10  
11  
12  
13  
14  
15  
16  
17  
18  
19  
20  
21  
22  
23  
24  
25  
26  
27  
28  
29  
30  
31  
32  
33  
34  
35  
36  
37  
38  
39  
40  
41  
42  
43  
44  
45  
46  
47  
48  
49  
50  
51  
52  
53  
54  
55  
56  
57  
58  
59  
60

1 An inclusion criterion for both patients and healthy participants was age 18-65 years. In addition,  
2 patients had to have at least one shoulder clinically diagnosed with tendinosis (positive signs from  
3  $\geq 3$  clinical tests (Hawkins-Kennedy test; Neers test; Empty Can test; Full Can test; Resisted  
4 external rotation test)) and based on MRI ( $\geq$  Grade 1; corresponding to focal increase in tendon  
5 signal on protondensity-weighted and fat-suppressed T2 sequences not equal to that of fluid.<sup>21</sup>

6 If both shoulders were MRI-scanned, the most severely affected side was included.

7 Inclusion criteria for the healthy participants were no previously experienced shoulder problems,  
8 and negative signs from all five clinical tests described above. For these participants, the choice of  
9 shoulder was matched with that of the patients.

10 Exclusion criteria for both groups were: Tears  $>1/3$  of the vertical height of the supraspinatus  
11 tendon, since the stress may be increased on the intact tendon part, and calcifications  $>2$  mm  
12 (length) due to acoustic shadowing. Further exclusion criteria were: previous comorbidities  
13 (potentially harmful to the tendon) such as; past/present shoulder fractures, surgery and luxation,  
14 known neuromuscular disease, rheumatoid arthritis, cancer, fibromyalgia, spondyloarthropathy  
15 and psychiatric disorders. Pregnancy and inability to read and understand Danish were also  
16 exclusion criteria.

17

## 18 **SEL image capturing and measurement**

### 19 *Apparatus*

20 All measurements were performed with the Logiq S7 using a 15 MHz linear probe (GE Healthcare,  
21 Milwaukee, USA). Manufacturer recommendations for musculoskeletal SEL of the shoulder were  
22 used, including a transducer movement rate of approximately 120 cycles/min, axial smoothing of  
23 2, lateral smoothing of 3, frequency of 10 and a soft/hard compression of 5.

1  
2  
3  
4 1 *Patient placement*

5  
6  
7 2 The SEL was obtained with the patient sitting in an erect posture with the arm internally rotated,  
8  
9 3 elbow flexed to 90° and with the dorsal side of the hand placed over the sacrum, as previously  
10  
11 4 used.<sup>15</sup> The probe was placed on the anterior aspect of the acromion in the coronal plane and the  
12  
13  
14 5 images were obtained just laterally to the anterior-lateral corner of the acromion in the  
15  
16 6 longitudinal plane of the supraspinatus tendon (Figure 1).  
17  
18  
19 7

20  
21 8 *Image capturing*

22  
23  
24 9 An image window depth of at least three times the tendon size and an image width covering about  
25  
26 10 three-quarters of the screen were used as recommended for longitudinal SEL.<sup>22</sup> The tissue was  
27  
28  
29 11 compressed approximately 2-5 mm,<sup>9</sup> and a software incorporated quality control (expressed as 1-  
30  
31 12 5 green bars being displayed, with 5 bars being the most acceptable) was used to evaluate the  
32  
33  
34 13 recommended compression size.  
35  
36 14

37  
38 15 For each assessment method (with or without GEL covering the transducer, (Sonokit (Proxon),  
39  
40  
41 16 thickness: 10 mm, length: 70 mm, elastic modulus: 226 kPa; Sonogel Vertriebs GmbH, Germany)),  
42  
43 17 three sessions of 20 seconds were obtained.  
44  
45  
46 18

47  
48 19 *Image measurements*

49  
50 20 Tendon characteristics were evaluated quantitatively and qualitatively.

51  
52  
53 21 Quantitatively, ROIs on the SEL images were drawn over the target area (supraspinatus tendon)  
54  
55  
56 22 and the exact raw strain value (RAW) (0-6; 6 being the hardest tissue) was calculated.  
57  
58  
59  
60

1  
2  
3  
4  
5  
6  
7  
8  
9  
10  
11  
12  
13  
14  
15  
16  
17  
18  
19  
20  
21  
22  
23  
24  
25  
26  
27  
28  
29  
30  
31  
32  
33  
34  
35  
36  
37  
38  
39  
40  
41  
42  
43  
44  
45  
46  
47  
48  
49  
50  
51  
52  
53  
54  
55  
56  
57  
58  
59  
60

1 Further, an adjacent reference region (normal tissue, experiencing the same stress as the target  
2 region) was drawn. From these two variables, the strain ratio (0-60; 60 being the hardest tissue)  
3 was calculated.<sup>23</sup> Two different reference tissues were used: a 1 mm circle region in a soft part of  
4 the deltoid/bursal area for the DELT measurement (Figure 2), and a 5 mm circle region in GEL  
5 covering the transducer, for the GEL measurement (Figure 3).<sup>13 24</sup> GEL was used as a more  
6 homogeneous reference tissue.

7 For the raw values alone and the strain ratios (strain raw value of supraspinatus tendon (A) to  
8 strain raw value of reference tissue (B) = A/B), a mean of the three measured areas of the  
9 supraspinatus tendon was calculated including data from 5-15 seconds of the 20-second cycle as  
10 recommended by the manufacturer.

11 Quantitative measurements were based on examination of three entire cine-loops (10 seconds)  
12 rather than on single static images,<sup>25</sup> in order to minimise intra-observer variation and avoid  
13 transient temporal fluctuations. Only sequences with the highest image quality (with green bars  
14 on the quality assessment) were used as recommended by the manufacturer.

15  
16 Due to difficulties in defining the most lateral part of the supraspinatus insertion on the humeral  
17 head, a 6.5 mm chord was drawn (in the lateral direction) from the medial part of the insertion on  
18 the humeral head to the lateral part of the tuberculum major. The average length of the  
19 supraspinatus insertion has previously been estimated to be 6.5 mm.<sup>26</sup> This fix point (end of the  
20 line at the lateral part of the insertion) was used to draw a 23 mm (7.7 x 3) horizontal line in the  
21 medial direction (which has been estimated to be the average length of the tendon),<sup>27</sup> ensuring  
22 agreement of measurement area (Figure 4).

1  
2  
3  
4 1 Caudal borders for image measurements were bony surfaces (of the humeral head), while cranial  
5  
6  
7 2 borders were the transition zone between the superior surface of the supraspinatus tendon and  
8  
9 3 the inferior surface of the deltoid muscle and bursa. The bursa area was used as reference tissue  
10  
11 4 (red colour in the SEL image). If no red border was seen, an estimated border followed the  
12  
13  
14 5 superior surface of the tendon.  
15  
16  
17 6

18  
19 7 Qualitatively, the images were rated using a colour scale, from 1-4, according to the following:  
20  
21 8 Type 1, < 10% colour other than blue (indicating a high tissue stiffness); Type 2, 11-25% colour  
22  
23 9 other than blue; Type 3, 26-50% colour other than blue; or Type 4, > 50% colour other than blue  
24  
25  
26 10 (indicating a low tissue stiffness). Furthermore, the number of yellow/red lesions was graded as  
27  
28 11 follows: 0=no lesions; 1=one lesion; 2=two lesions; and 3=more than two lesions.<sup>14</sup> The qualitative  
29  
30  
31 12 classifications were all performed on the first high quality image recorded closest to 10 seconds  
32  
33  
34 13 into the first cycle.  
35  
36 14

### 37 38 15 **Development of SEL method**

39  
40  
41 16 Based on previous studies,<sup>14 16 25 28-31</sup> a protocol with standardised procedures was developed for  
42  
43 17 obtaining SEL characteristics in the Supraspinatus tendon and tested in Phase One on 10  
44  
45  
46 18 participants.  
47

48 19 Based on the results from these participants, adjustments to the type of reference tissue and  
49  
50 20 colour scale criteria were performed. One adjustment involved the replacement of the  
51  
52  
53 21 subcutaneous fat with DELT as reference tissue, since the subcutaneous fat layer in some  
54  
55  
56 22 participants was too thin to measure. Another adjustment was to base the colour scale on the  
57  
58  
59  
60

1  
2  
3  
4 1 percentage of colour (replacement of estimation of the most pronounced colour), which made it  
5  
6  
7 2 possible to rate a blue (hard) tendon as softer if it appeared with yellow/red lesions.  
8

9 3 In Phase Two, the adjusted protocol was applied to 20 new participants. Overall agreement in  
10  
11 4 Phase Two corresponded to >80% with blinded raters. Thereafter, Phase Three (n=40) was  
12  
13  
14 5 initiated based on the final protocol, as described above.  
15  
16  
17 6

## 18 19 7 **Questionnaires**

20  
21 8 Participants completed questionnaires, including the DASH (Disabilities of the Arm, Shoulder and  
22  
23  
24 9 Hand) for investigating disability of the upper extremities (0-100; 100 being most disabled),<sup>32</sup>  
25  
26 10 The VAS (Visual Analogue Scale) for assessing pain level (0-100; 100 being the most painful),<sup>33</sup> the  
27  
28  
29 11 EQ-5D-3L for measuring health-related quality of life, and the EQ-VAS<sup>34</sup> also for health-related  
30  
31 12 quality of life (0-100; 100 being best imaginable health status). Demographic data included  
32  
33  
34 13 information on age, sex, and BMI.  
35  
36 14

## 37 38 15 **Statistics**

39  
40  
41 16 SEL data were found to be normally distributed on a histogram. For continuous data (mean of the  
42  
43 17 three measured areas of the supraspinatus tendon) the ICC (model 2.3, absolute agreement, 2-  
44  
45  
46 18 way random, single measures) was calculated to determine intra-rater and inter-rater reliability.<sup>35</sup>  
47  
48 19 The ICC, with 95% confidence intervals (95% C.I.), was calculated for RAW, and for strain ratios  
49  
50  
51 20 (DELT and GEL). The ICCs were interpreted as <0.40=poor, 0.40-0.59=fair, 0.60-0.74=good and ≥  
52  
53 21 0.75=excellent reliability.<sup>36</sup>  
54  
55  
56 22  
57  
58  
59  
60

1  
2  
3  
4 1 Paired student t-tests were completed for statistical comparison of ratings (Rater 1 (first time) vs.  
5  
6  
7 2 Rater 1 (second time), and Rater 1 vs. Rater 2) using a significance level of 0.05. Bland and Altman  
8  
9 3 plots with 95% limits of agreement (LOA) were calculated to evaluate systematic differences,<sup>37</sup>  
10  
11 4 with the 95% LOA calculated as the mean difference  $\pm 1.96$  x standard deviation of the difference  
12  
13  
14 5 (SD).<sup>38</sup>  
15  
16  
17 6

18  
19 7 Standard Error of Measurements (SEM) was calculated using the formula: SEM = SDmean  
20  
21 8 difference/ $\sqrt{2}$ ,<sup>39</sup> and Minimal Detectable Change 95% (MDC<sub>individual</sub>) was calculated using the  
22  
23  
24 9 formula: MDC = SEM x  $\sqrt{2}$  x 1.96<sup>40</sup> and the relative MDC was calculated as a percentage of the  
25  
26 10 average SEL values of Rater 1 and Rater 2.  
27  
28  
29 11

30  
31 12 For ordinal data, linear weighted Cohen's  $\kappa$  (LW $\kappa$ ) was used to calculate reliability with 95% CIs for  
32  
33 13 colour ratings and number of lesions. LW $\kappa$  was interpreted as <0=poor agreement, 0.01-  
34  
35  
36 14 0.20=slight agreement, 0.21-0.40=fair agreement, 0.41-0.60=moderate agreement, 0.61-  
37  
38  
39 15 0.80=substantial agreement and >0.81=almost perfect agreement.<sup>41</sup>  
40  
41 16

42  
43 17 Statistical analyses were performed in SPSS, version 25.0 (SPSS Inc., Chicago, IL).  
44  
45  
46 18  
47  
48 19  
49  
50  
51  
52  
53  
54  
55  
56  
57  
58  
59  
60



## 1 RESULTS

2  
3  
4  
5  
6  
7  
8  
9  
10  
11  
12  
13  
14  
15  
16  
17  
18  
19  
20  
21  
22  
23  
24  
25  
26  
27  
28  
29  
30  
31  
32  
33  
34  
35  
36  
37  
38  
39  
40  
41  
42  
43  
44  
45  
46  
47  
48  
49  
50  
51  
52  
53  
54  
55  
56  
57  
58  
59  
60

2 Demographics varied between patients and healthy participants, on most parameters. Due to the  
3 sampling method, the patients were expected to be older, with a higher BMI, more pain and  
4 disability, and reduced quality of life compared with healthy participants (Table 1).

**Table 1**

Demographics (mean; SD (frequencies and percentages for dominant arm and EQ-5D)) of patients and healthy participants from the study phase (n = 40).

| Variable                    | Patients (n = 20)  | Healthy participants (n = 20) |
|-----------------------------|--------------------|-------------------------------|
| Age (years)                 | 47.85 (7.63)       | 25.70 (6.10)                  |
| Females (%)                 | 14 (70)            | 11 (55)                       |
| BMI                         | 30.49 (6.57)       | 24.94 (2.45)                  |
| Dominant arm                | 12 (60%)           | 10 (50%)                      |
| VAS rest (0-100)            | 24.60 (20.96)      | 0 (0.00)                      |
| VAS activity (0-100)        | 53.35 (16.62)      | 0 (0.00)                      |
| VAS sleep (0-100)           | 49.60 (18.26)      | 0 (0.00)                      |
| VAS maximum (0-100)         | 78.05 (11.62)      | 0 (0.00)                      |
| DASH (0-100)                | 34.75 (17.48)      | 1.71 (4.21)                   |
| EQ-VAS (0-100)              | 53.24 (38.31)      | 72.90 (36.40)                 |
| <b>EQ-5D-3L</b>             | <b>Frequencies</b> | <b>Frequencies</b>            |
| Mobility problems           | 0 (0%)             | 0 (0%)                        |
| Self-care problems          | 10 (50%)           | 1 (5%)                        |
| Usual activities problems   | 1 (5%)             | 0 (0%)                        |
| Pain/discomfort problems    | 20 (100%)          | 1 (5%)                        |
| Anxiety/depression problems | 5 (20%)            | 1 (5%)                        |

Abbreviations: SD, Standard Deviation; BMI, Body Mass Index; VAS, Visual Analogue Scale; DASH, Disability of the Arm, Shoulder and Hand Questionnaire; EQ-5D-3L, Quality of Life by dimension; EQ-VAS, Quality of Life

6  
7  
8  
9  
10  
11  
12  
13  
14  
15  
16  
17  
18  
19  
20  
21  
22  
23  
24  
25  
26  
27  
28  
29  
30  
31  
32  
33  
34  
35  
36  
37  
38  
39  
40  
41  
42  
43  
44  
45  
46  
47  
48  
49  
50  
51  
52  
53  
54  
55  
56  
57  
58  
59  
60

6 The paired t-test showed statistical differences in inter-rater measurements for RAW and in intra-  
7 rater measurements for GEL (Table 2).

1

**Table 2**

Reliability of strain elastography in the Supraspinatus tendon using respectively the deltoid muscle (reference) and a gel pad (reference) and raw data from the study phase (n = 40).

| <b>Continuous scale</b>   | Mean (SD)      | Mean (SD)      | Mean Difference (SD) | P     | LOA         | SEM  | MDC (%)      | ICC (95% C.I.)   |
|---------------------------|----------------|----------------|----------------------|-------|-------------|------|--------------|------------------|
| <b>Mean across tendon</b> |                |                |                      |       |             |      |              |                  |
| <b>Intra-rater</b>        | <b>Rater 1</b> | <b>Rater 1</b> |                      |       |             |      |              |                  |
| RAW                       | 4.40 (0.55)    | 4.36 (0.55)    | 0.04 (0.14)          | 0.09  | -0.24; 0.33 | 0.10 | 0.28 (6.36)  | 0.97 (0.93-0.98) |
| DELT (ratio)              | 14.33 (3.07)   | 14.23 (3.16)   | 0.10 (1.48)          | 0.66  | -2.81; 3.01 | 1.05 | 2.91 (20.37) | 0.89 (0.80-0.94) |
| GEL (ratio)               | 2.87 (1.28)    | 2.59 (1.01)    | 0.28 (0.82)          | 0.04* | -1.33; 1.89 | 0.58 | 1.61 (58.82) | 0.73 (0.54-0.85) |
| <b>Inter-rater</b>        | <b>Rater 1</b> | <b>Rater 2</b> |                      |       |             |      |              |                  |
| RAW                       | 4.40 (0.55)    | 4.53 (0.61)    | -0.13 (0.24)         | 0.00* | -0.60; 0.34 | 0.17 | 0.47 (10.53) | 0.89 (0.75-0.95) |
| DELT (ratio)              | 14.33 (3.07)   | 14.56 (2.60)   | -0.22 (1.88)         | 0.46  | -3.91; 3.46 | 1.33 | 3.69 (25.51) | 0.78 (0.63-0.88) |
| GEL (ratio)               | 2.87 (1.28)    | 2.73 (1.00)    | 0.14 (0.89)          | 0.32  | -1.61; 1.90 | 0.63 | 1.75 (62.63) | 0.70 (0.50-0.83) |

2 Abbreviations: SD, Standard Deviation; LOA, Limits of Agreement; SEM, Standard Error of Mean; MDC, Minimal Detectable Change; ICC (95% C.I.),  
 3 Intra-class Correlation Coefficient with 95% confidence intervals; DELT, Reference area in the Deltoid Muscle; GEL, Reference area in the Gel Pad;  
 4 RAW, Raw Elastography Data; \*, significant difference ( $p \leq 0.05$ ) between measurements.

5

1  
2  
3  
4 1 None of the Bland and Altman plots showed funnel effects (increasing difference with  
5  
6  
7 2 increasing mean size) (Figure 5).  
8  
9

10 3 For intra-rater and inter-rater reliability, there was 'excellent agreement' using RAW and  
11  
12 4 DELT (ICC: intra-rater: 0.97, inter-rater: 0.89), (ICC: intra-rater: 0.89, inter-rater: 0.78)  
13  
14  
15 5 respectively and the reliability was 'good' when using GEL (ICC: intra-rater: 0.73, inter-rater:  
16  
17 6 0.70) (Table 2). The same pattern of results was also seen for each of the three measured  
18  
19 7 areas of the Supraspinatus tendon (medial, middle and lateral parts) (not shown in tables).  
20  
21  
22 8

23  
24  
25 9 For the intra-rater reliability, the relative MDC was smallest for RAW (6.36%), larger for  
26  
27 10 DELT (20.37%) and largest for GEL (58.82%). For inter-rater reliability, the same pattern was  
28  
29  
30 11 seen for MDC, with a minimum of 10.53%, 25.51% and 62.63%, for RAW, DELT and GEL,  
31  
32 12 respectively.  
33

34  
35 13 The reliability of using the colour scale (performed without GEL), kappa (LWk) was very  
36  
37 14 similar, with intra-rater reliability ranging from LWk: 0.76-0.79, representing 'substantial  
38  
39 15 agreement', and inter-rater agreement ranging from LWk: 0.71-0.81 representing  
40  
41  
42 16 'substantial to almost perfect agreement'.  
43

44  
45 17 For the number of yellow/red lesions, LWk was generally highest for intra-rater ranging from  
46  
47 18 0.40-0.82 representing 'fair to almost perfect agreement', while for inter-rater reliability  
48  
49 19 LWk ranged from 0.24-0.67 representing 'fair to substantial agreement' (Table 3).  
50  
51  
52  
53  
54  
55  
56  
57  
58  
59  
60

**Table 3**

Reliability of strain elastography in the Supraspinatus tendon using data based on colours, respectively a colour scale and counting the number of lesions from the study phase (n=40)

| Ordinal scale        | Intra-rater         |                   | Inter-rater         |                   |
|----------------------|---------------------|-------------------|---------------------|-------------------|
|                      | Total Agreement (%) | LWκ (95% C.I.)    | Total Agreement (%) | LWκ (95% C.I.)    |
| <b>Colourscale</b>   |                     |                   |                     |                   |
| Medial tendon 1/3    | 80                  | 0.76 (0.64-0.89)  | 80                  | 0.77 (0.63-0.91)  |
| Middle tendon 1/3    | 82.5                | 0.77 (0.65-0.88)  | 76                  | 0.71 (0.58-0.83)  |
| Lateral tendon 1/3   | 85                  | 0.79 (0.65-0.94)  | 87.5                | 0.81 (0.65-0.97)  |
| <b>Lesions (no.)</b> |                     |                   |                     |                   |
| Medial tendon 1/3    | 87.5                | 0.82 (0.69-0.95)  | 82.5                | 0.67 (0.53-0.80)  |
| Middle tendon 1/3    | 90                  | 0.75 (0.51-1.00)  | 87.5                | 0.63 (0.30-0.96)  |
| Lateral tendon 1/3   | 87.5                | 0.40 (-0.16-0.97) | 90                  | 0.24 (-0.14-0.62) |

Abbreviations: LWκ (95% C.I.), Linear Weighted κ with 95% confidence intervals

1

1  
2  
3  
4 1 For the medial and middle tendon part of the supraspinatus, LWk was 'substantial to almost  
5  
6  
7 2 perfect' for intra-rater (LWk 0.75-0.82) and 'substantial' for inter-rater (LWk 0.63-0.67)  
8  
9 3 reliability, while for the lateral tendon part, LWk was low, corresponding to only 0.40 and  
10  
11 4 0.24 for intra-rater and inter-rater reliability, respectively, representing 'fair agreement'.  
12  
13  
14 5  
15  
16 6  
17  
18  
19  
20  
21  
22  
23  
24  
25  
26  
27  
28  
29  
30  
31  
32  
33  
34  
35  
36  
37  
38  
39  
40  
41  
42  
43  
44  
45  
46  
47  
48  
49  
50  
51  
52  
53  
54  
55  
56  
57  
58  
59  
60

For peer review only

## 1 DISCUSSION

2 The reliability of the results from SEL was 'excellent' when using the raw data and DELT as  
3 reference tissue. When using GEL as reference tissue, the reliability of the results was 'good'.  
4 Furthermore, the relative MDC (% of mean) was smallest for RAW and largest for GEL.

5  
6 When using the colour scale grading, LWk represented 'substantial agreement' to  
7 'substantial to almost perfect agreement'. For the number of yellow/red lesions, LWK was  
8 highest for intra-rater reliability, in the medial and middle tendon parts, LWk was 'substantial  
9 to almost perfect', while for the lateral tendon part LWk was low, corresponding to only  
10 'fair' agreement'.

### 11 12 **Strain Ratios and Raw data**

13 The ROIs with raw SEL data (no reference tissue) resulted in the highest reliability in intra-  
14 rater as well as inter-rater reliability. Although there was a significant difference between  
15 Rater 1 and Rater 2 for RAW, this difference was less than the MDC and is ascribed to  
16 measurement error.

17 To our knowledge, no study has previously presented raw SEL data, which precludes  
18 comparison with other studies. Using raw data has limitations, since there is, in comparison  
19 with using ratios, no possibilities to adjust for different transducer pressures. On the other  
20 hand, the advantage is that it gives a more quantitative estimate than when using visual  
21 inspections, as for example in the colour scale, or with uncertainties due to selection of  
22 reference tissue.

1  
2  
3  
4 1 In the current study, only one rater captured the images (using almost the same pressure)  
5  
6  
7 2 and two raters traced and measured the areas. If more than one rater were to capture the  
8  
9  
10 3 images, a lower reliability may be expected, due to potentially different transducer pressure.  
11  
12 4  
13  
14 5 Different reference tissues in SEL measurements of the musculoskeletal area make it difficult  
15  
16  
17 6 to compare data across studies. The reference tissues previously used for calculating strain  
18  
19 7 ratios in the achilles and supraspinatus tendon areas have included bone,<sup>15</sup> fat,<sup>13 25 31 42 43</sup> and  
20  
21 8 GEL/acoustic coupler.<sup>13 16 44</sup> Using bone as a reference value has limitations, since ultrasound  
22  
23  
24 9 cannot penetrate bone material, meaning that data coming from this region are artefacts.  
25  
26  
27 10 In addition, strain ratios may be based on different equations in different studies, placing the  
28  
29 11 ROIs of the tendon in the denominator,<sup>13 45</sup> or, as in the current study, in the numerator.<sup>25 31</sup>  
30  
31 12 Due to thin subcutaneous fat tissue area in some participants, the reference tissue was  
32  
33  
34 13 replaced, after Phase One, with DELT and GEL (artificial fat tissue).  
35  
36  
37 14 When using DELT as the reference tissue, reliability was found to be excellent (both intra-  
38  
39 15 rater and inter-rater). Muscle tissue increases stiffness significantly after exercise and muscle  
40  
41 16 contractions,<sup>16 24</sup> and therefore, limitations are recognised when using this tissue as  
42  
43  
44 17 reference when for example, investigating tendon tissue response to muscle contractions.  
45  
46  
47 18 However, no previous study of SEL on the supraspinatus tendon has used muscle tissue as a  
48  
49 19 reference for the calculated strain ratios.  
50  
51 20  
52  
53 21 The current study found a high MDC for GEL (large measurement error) but a good reliability  
54  
55  
56 22 (ICC 0.70-0.73), in line with previous studies. One study, using the Kager's fat pad (fat  
57  
58 23 deposit within the Kager triangle anterior to the achilles tendon) as reference tissue in the  
59  
60

1  
2  
3  
4 1 achilles tendon, also found good to excellent intra-rater and inter-tester reliability (ICC: 0.51-  
5  
6 0.78) in the longitudinal plane; however, with much lower reliability (ICC: 0.41-0.45) in the  
7  
8 axial plane.<sup>25</sup> Unfortunately, MDC was not reported. The ICC and MDC in the current study  
9  
10 are reported as single measures, as it is of relevance to clinicians. None of the previous  
11  
12 studies<sup>16 44</sup> have described whether ICC is reported as a single measure or (group) average  
13  
14 measure, however, it is anticipated that it is a group average measure. In the current study,  
15  
16 the ICC will increase about 10% and the MDC will decrease up to 80% when reported as  
17  
18 average measures. This could explain some of the differences in results between the current  
19  
20 and previous studies.  
21  
22  
23  
24  
25

26 10 In the current study, the data using GEL are also in line with a study using an acoustic  
27  
28 coupler as reference tissue in the supraspinatus tendon,<sup>16</sup> where excellent intra-rater  
29  
30 reliability was shown, as was also confirmed for the achilles tendon.<sup>44</sup> An acoustic coupler is  
31  
32 similar to GEL and may be acceptable, but ideally, the reference area should be the same  
33  
34 depth as the ROI (in this case, the supraspinatus tendon). As GEL is not located close to the  
35  
36 tendon, the ROIs using GEL will not be subjected to the same amount of tissue pressure as  
37  
38 the tendon, which may affect reliability and validity.  
39  
40  
41  
42

43 17 The current study found the lowest reliability (however, it was still graded 'good') when  
44  
45 using GEL which may be caused by difficulties locating the footprint of the tendon, due to  
46  
47 lower image quality, because of increased depth (through 10 mm of GEL).  
48  
49

50 20 A statistically significant intra-rater difference was also seen, but as this difference was  
51  
52 below the MDC, it can be ascribed to measurement error.  
53  
54  
55

56 22

## 58 23 **Colour Ratings**

59  
60



1  
2  
3  
4 1 The current study found a high reliability ('substantial' to 'almost perfect') when grading the  
5  
6 2 ROIs of SEL images according to a 4-level colour scale, where blue tissue indicated hard  
7  
8 3 tissue and red tissue indicated soft tissue. This is in line with a previous study on the achilles  
9  
10 4 tendon using colour scales of 5 levels (1=blue (hardest tissue), 2=light blue, 3=green,  
11  
12 5 4=yellow, 5=red (softest tissue)), where good to excellent inter-rater ( $\kappa = 0.897$ ) and intra-  
13  
14 6 rater ( $\kappa = 1$ ) reliability was found.<sup>30</sup>  
15  
16  
17  
18  
19  
20  
21  
22

23  
24 8 Alternative types of colour scales have been used in the musculoskeletal area, primarily for  
25  
26 9 the achilles tendon, with categorisation of the achilles tendon into a two-level category scale  
27  
28 10 (green/blue vs. red),<sup>25</sup> and a three-level category scale (blue/yellow/red).<sup>22 29</sup> The current  
29  
30 11 study has used the same colours for defining hard tissue (blue), and for soft tissue (red), but  
31  
32 12 with a four-level category scale, and with more precise criteria for the different levels which  
33  
34 13 were found necessary due to the mixture of colours in the supraspinatus tendon observed in  
35  
36 14 Phase One.  
37  
38  
39  
40

41 16 In the current study, LWk in the medial and the middle parts of the tendon was 'substantial  
42  
43 17 to almost perfect' when counting the number of yellow/red lesions in both intra-rater and  
44  
45 18 inter-rater reliability. Even though the total agreement was also high in the lateral third of  
46  
47 19 the tendon, LWk was relatively low compared with the medial and the middle parts of the  
48  
49 20 tendon. The reason may be due to the low presence of lesions in the lateral part,  
50  
51 21 corresponding to only 10 % of the participants presenting with lesions in the lateral 1/3 of  
52  
53 22 the tendon, which can lead to the 'Kappa Paradox'.<sup>46</sup> The Kappa Paradox means (in a 2x2  
54  
55 23 table) that an imbalance between presence and absence in overall agreement, and between  
56  
57  
58  
59  
60

1  
2  
3  
4 1 disagreement (bias) can drastically lower the kappa, why prevalence and bias-adjusted  
5  
6 2 kappa (PABAK) in dichotomous scales is recommended.<sup>47</sup> A PABAK on the current number of  
7  
8 3 lesions dichotomised into no lesion /lesion(s) will increase the kappa by up to 70%. Another  
9  
10 4 explanation is that since the pressure is placed vertically on the medial part of the tendon,  
11  
12 5 the lateral part will have experienced a smaller degree of stress.

13  
14  
15  
16 6 The high reliability of the number of focal lesions (LwK intra-rater reliability: 87.5-90, LwK  
17  
18 7 inter-rater reliability: 82.5-90) is in line with a previous study on the supraspinatus tendon  
19  
20 8 where an almost perfect reliability ( $k = 0.83$ ) was found.<sup>14</sup>  
21  
22  
23

24  
25  
26 10 The current methods of using colour grading and lesion counts for assessing tendon stiffness  
27  
28 11 in the supraspinatus tendon showed high reliability. These methods are feasible for use in  
29  
30 12 clinical practice as they can be performed quickly, but when more than one clinician is  
31  
32 13 performing the SEL, the method cannot adjust for potentially different transducer pressures.  
33  
34  
35

### 36 14

### 37 15 **Limitations**

38  
39  
40  
41 16 Manual compression may affect reliability, especially when using raw data, colour grading  
42  
43 17 and counting yellow/red lesions. To partly counteract this, a quality bar was used that  
44  
45 18 provided instant feedback on the uniformity of the transducer pressure. Reference tissues  
46  
47 19 (DELT and GEL) with calculation of strain ratios were also used, thereby making a comparison  
48  
49 20 possible between the methods.

50  
51  
52  
53 21 Furthermore, as mentioned, SEL is highly operator-dependent, why the same (and only one)  
54  
55 22 trained operator captured the present images, thereby further decreasing the risk of bias,  
56  
57 23 but this limits the external validity of the results.  
58  
59  
60

1  
2  
3  
4 1 In addition, age was not blinded and, as reported earlier, tendons get softer with age.<sup>48</sup>  
5  
6  
7 2 Therefore, the current blinding of examiner results and health status may not have been  
8  
9 3 sufficient.

10  
11  
12 4

### 13 5 **Strengths**

14  
15  
16 6 The strength of this study was the design, incorporating a stepwise and standardised  
17  
18 7 procedure for reliability which minimised bias and increased reliability.<sup>17</sup> Furthermore, both  
19  
20  
21 8 patients and healthy participants were enrolled.

22  
23  
24 9 To enhance standardisation, all SEL ROIs were measured at a fixed point, just laterally from  
25  
26 10 the anterior-lateral corner of the acromion in the longitudinal plane of the supraspinatus  
27  
28 11 tendon.<sup>20</sup> In addition, the reliability was estimated by using three different quantitative  
29  
30  
31 12 methods (RAW, DELT and GEL), as well as two different qualitative methods (colour and  
32  
33  
34 13 number of yellow/red focal lesions).

1  
2  
3  
4 **1 CONCLUSION**  
5

6  
7 2 Intra-rater and inter-rater reliability were excellent using raw values and ratios with the  
8  
9 3 deltoid muscle as reference tissue, and good when using a gel pad as reference tissue.  
10

11 4 The reliability of colour scale ratings was substantial to almost perfect and the number of  
12  
13  
14 5 lesions was fair to almost perfect.

15  
16 6 Although high reliability was found, validity and responsiveness of these elastographic  
17  
18  
19 7 methods needs further investigation.  
20

21 8  
22  
23  
24  
25  
26  
27  
28  
29  
30  
31  
32  
33  
34  
35  
36  
37  
38  
39  
40  
41  
42  
43  
44  
45  
46  
47  
48  
49  
50  
51  
52  
53  
54  
55  
56  
57  
58  
59  
60

1  
2  
3  
4 **Contributorship statement**

5 2 KB, JH, PK, KGI and BJ-K conceived and designed the study protocol. KB and BJ-K procured  
6 3 the project funding. KB, JH, PK, and BJ-K developed and standardised the ultrasound  
7 4 procedure. JH, KB and KGI recruited participants.

8 5 KB was the project coordinator and captured the strain elastography images. KGI performed  
9 6 the physical tests. KB and JH rated the images. KB and BJ-K planned and coordinated the  
10 7 statistical analyses. KB performed the statistical analyses. KB drafted the manuscript, and JH,  
11 8 PK, KGI and BJ-K contributed to the manuscript. All authors read and approved the final  
12 9 manuscript. KB is the guarantor.

13  
14  
15  
16  
17 **Competing interests**

18 12 The authors declare no conflicts of interest.

19  
20  
21  
22 **Funding**

23 15 This work was supported by the Region of South Denmark (14/38969, 15/24799), The Danish  
24 16 Rheumatism Association (R150-A4296) and the Danish Council of Radiographers (no grant  
25 17 number).

26  
27 **Data sharing statement**

28 20 No additional data are available.

29  
30  
31  
32  
33  
34  
35  
36  
37  
38  
39  
40  
41  
42  
43  
44  
45  
46  
47  
48  
49  
50  
51  
52  
53  
54  
55  
56  
57  
58  
59  
60

1  
2  
3  
4  
5  
6  
7  
8  
9  
10  
11  
12  
13  
14  
15  
16  
17  
18  
19  
20  
21  
22  
23  
24  
25  
26  
27  
28  
29  
30  
31  
32  
33  
34  
35  
36  
37  
38  
39  
40  
41  
42  
43  
44  
45  
46  
47  
48  
49  
50  
51  
52  
53  
54  
55  
56  
57  
58  
59  
60  
**REFERENCES**

1. Luime JJ, Koes BW, Hendriksen IJ, et al. Prevalence and incidence of shoulder pain in the general population; a systematic review. *Scand J Rheumatol* 2004;33(2):73-81.
2. Singh SG, Sumit.; Mohammad, F.; Kumar, S.; Kumar, D.; Kumar, S. Prevalence of shoulder disorders in tertiary care centre. *J Res Med Sci* 2015;3(4):917-20.
3. Nyman PP, K.; Panula, H.; Mälkiä, E. Patients' experience of shoulder problems prior to and following intervention. *Physiother Theory Pract* 2012;28(3):221-31.
4. Virta L, Joranger P, Brox JJ, et al. Costs of shoulder pain and resource use in primary health care: a cost-of-illness study in Sweden. *BMC Musculoskelet Disord* 2012;13:17.
5. Teunis T, Lubberts B, Reilly BT, et al. A systematic review and pooled analysis of the prevalence of rotator cuff disease with increasing age. *J Shoulder Elbow Surg* 2014;23(12):1913-21.
6. Klauser AS, Faschingbauer R, Jaschke WR. Is sonoelastography of value in assessing tendons? *Semin Musculoskelet Radiol* 2010;14(3):323-33.
7. Prado-Costa R, Rebelo J, Monteiro-Barroso J, et al. Ultrasound elastography: compression elastography and shear-wave elastography in the assessment of tendon injury. *Insights Imaging* 2018
8. Dietrich CF, Barr RG, Farrokh A, et al. Strain Elastography - How To Do It? *Ultrasound Int Open* 2017;3(4):E137-e49.
9. Garra BS. Elastography: history, principles, and technique comparison. *Abdom Imaging* 2015;40(4):680-97.
10. Chung SW, Kim JY, Yoon JP, et al. Arthroscopic repair of partial-thickness and small full-thickness rotator cuff tears: tendon quality as a prognostic factor for repair integrity. *Am J Sports Med* 2015;43(3):588-96.
11. Bamber J, Cosgrove D, Dietrich CF, et al. EFSUMB guidelines and recommendations on the clinical use of ultrasound elastography. Part 1: Basic principles and technology. *Ultraschall Med* 2013;34(2):169-84.
12. Fusini F, Langella F, Busilacchi A, et al. Real-time sonoelastography: principles and clinical applications in tendon disorders. A systematic review. *Muscles Ligaments Tendons J* 2017;7(3):467-77.
13. Lee SU, Joo SY, Kim SK, et al. Real-time sonoelastography in the diagnosis of rotator cuff tendinopathy. *J Shoulder Elbow Surg* 2016;25(5):723-9.
14. Seo JB, Yoo JS, Ryu JW. Sonoelastography findings of supraspinatus tendon in rotator cuff tendinopathy without tear: comparison with magnetic resonance images and conventional ultrasonography. *J Ultrasound* 2015;18(2):143-9.

1  
2  
3  
4  
5  
6  
7  
8  
9  
10  
11  
12  
13  
14  
15  
16  
17  
18  
19  
20  
21  
22  
23  
24  
25  
26  
27  
28  
29  
30  
31  
32  
33  
34  
35  
36  
37  
38  
39  
40  
41  
42  
43  
44  
45  
46  
47  
48  
49  
50  
51  
52  
53  
54  
55  
56  
57  
58  
59  
60

15. Tudisco C, Bisicchia S, Stefanini M, et al. Tendon quality in small unilateral supraspinatus tendon tears. Real-time sonoelastography correlates with clinical findings. *Knee Surg Sports Traumatol Arthrosc* 2013
16. Muraki T, Ishikawa H, Morise S, et al. Ultrasound elastography-based assessment of the elasticity of the supraspinatus muscle and tendon during muscle contraction. *J Shoulder Elbow Surg* 2015;24(1):120-6.
17. Patijn J. Reproducibility and Validity Studies of Diagnostic Procedures in Manual/Musculoskeletal Medicine 2004.
18. Kottner J, Audige L, Brorson S, et al. Guidelines for Reporting Reliability and Agreement Studies (GRRAS) were proposed. *J Clin Epidemiol* 2011;64(1):96-106.
19. Hougs Kjaer BPM, Ellegaard KPP, Wieland IP, et al. Intra-rater and inter-rater reliability of the standardized ultrasound protocol for assessing subacromial structures. *Physiother Theory Pract* 2017;33(5):398-409.
20. Ingwersen KG, Hjarbæk J, Eshøj H, et al. Ultrasound assessment for grading structural tendon changes in supraspinatus tendinopathy: an inter-rater reliability study. *B M J Open* 2016;6(5)
21. Sein ML, Walton J, Linklater J, et al. Reliability of MRI assessment of supraspinatus tendinopathy. *Br J Sports Med* 2007;41(8):e9.
22. De Zordo T, Fink C, Feuchtner GM, et al. Real-time sonoelastography findings in healthy Achilles tendons. *AJR Am J Roentgenol* 2009;193(2):W134-8.
23. Cosgrove D, Piscaglia F, Bamber J, et al. EFSUMB guidelines and recommendations on the clinical use of ultrasound elastography. Part 2: Clinical applications. *Ultraschall Med* 2013;34(3):238-53.
24. Niitsu M, Michizaki A, Endo A, et al. Muscle hardness measurement by using ultrasound elastography: a feasibility study. *Acta Radiol* 2011;52(1):99-105.
25. Drakonaki EE, Allen GM, Wilson DJ. Real-time ultrasound elastography of the normal Achilles tendon: reproducibility and pattern description. *Clin Radiol* 2009;64(12):1196-202.
26. Lumsdaine W, Smith A, Walker RG, et al. Morphology of the humeral insertion of the supraspinatus and infraspinatus tendons: Application to rotator cuff repair. *Clin Anat* 2015;28(6):767-73.
27. Curtis AS, Burbank KM, Tierney JJ, et al. The insertional footprint of the rotator cuff: an anatomic study. *Arthroscopy* 2006;22(6):609.e1.
28. De Zordo T, Lill SR, Fink C, et al. Real-time sonoelastography of lateral epicondylitis: comparison of findings between patients and healthy volunteers. *AJR Am J Roentgenol* 2009;193(1):180-5.
29. Klauser AS, Miyamoto H, Tamegger M, et al. Achilles tendon assessed with sonoelastography: histologic agreement. *Radiology* 2013;267(3):837-42.

- 1  
2  
3  
4  
5 1  
6 2 30. Sconfienza LM, Silvestri E, Cimmino MA. Sonoelastography in the evaluation of painful  
7 3 Achilles tendon in amateur athletes. *Clin Exp Rheumatol* 2010;28(3):373-8.  
8 4  
9 5 31. Turan A, Tufan A, Mercan R, et al. Real-time sonoelastography of Achilles tendon in patients  
10 6 with ankylosing spondylitis. *Skeletal Radiol* 2013;42(8):1113-8.  
11 7  
12 8 32. Kitis A, Celik E, Aslan UB, et al. DASH questionnaire for the analysis of musculoskeletal  
13 9 symptoms in industry workers: a validity and reliability study. *Appl Ergon* 2009;40(2):251-5.  
14 10  
15 11 33. Boonstra AM, Schiphorst Preuper HR, Reneman MF, et al. Reliability and validity of the visual  
16 12 analogue scale for disability in patients with chronic musculoskeletal pain. *Int J Rehabil Res*  
17 13 2008;31(2):165-9.  
18 14  
19 15 34. Norman R, Cronin P, Viney R, et al. International comparisons in valuing EQ-5D health states:  
20 16 a review and analysis. *Value Health* 2009;12(8):1194-200.  
21 17  
22 18 35. Shrout PE, Fleiss JL. Intraclass correlations: uses in assessing rater reliability. *Psychol Bull*  
23 19 1979;86(2):420-8.  
24 20  
25 21 36. Cicchetti D. Guidelines, Criteria, and Rules of Thumb for Evaluating Normed and Standardized  
26 22 Assessment Instrument in Psychology. *Psychol Assess* 1994;6(4):284-90.  
27 23  
28 24 37. Bland JM, Altman DG. Statistical methods for assessing agreement between two methods of  
29 25 clinical measurement. *Lancet* 1986;1(8476):307-10.  
30 26  
31 27 38. Ottenbacher KJ, Stull GA. The analysis and interpretation of method comparison studies in  
32 28 rehabilitation research. *Am J Phys Med Rehabil* 1993;72(5):266-71.  
33 29  
34 30 39. de Vet HCW, Terwee CB, Knol DL, et al. When to use agreement versus reliability measures. *J*  
35 31 *Clin Epidemiol* 2006;59(10):1033-9.  
36 32  
37 33 40. de Vet HCW, Terwee CB, Knol DL, et al. Measurements in Medicine - a practical guide. New  
38 34 York, USA: Cambridge University Press 2011.  
39 35  
40 36 41. Landis RJK, G.G. The Measurement of Observer Agreement for Categorical Data. *Biometrics*  
41 37 1977;33(1):159-74.  
42 38  
43 39 42. Busilacchi A, Olivieri M, Ulisse S, et al. Real-time sonoelastography as novel follow-up  
44 40 method in Achilles tendon surgery. *Knee Surg Sports Traumatol Arthrosc* 2014  
45 41  
46 42 43. Ooi CC, Schneider ME, Malliaras P, et al. Diagnostic performance of axial-strain  
47 43 sonoelastography in confirming clinically diagnosed Achilles tendinopathy: comparison with  
48 44 B-mode ultrasound and color Doppler imaging. *Ultrasound Med Biol* 2015;41(1):15-25.  
49 45  
50 46 44. Yamamoto Y, Yamaguchi S, Sasho T, et al. Quantitative Ultrasound Elastography With an  
51 47 Acoustic Coupler for Achilles Tendon Elasticity: Measurement Repeatability and Normative  
52 48 Values. *J Ultrasound Med* 2016;35(1):159-66.  
53 49  
54  
55  
56  
57  
58  
59  
60



1  
2  
3  
4  
5  
6  
7  
8  
9  
10  
11  
12  
13  
14  
15  
16  
17  
18  
19  
20  
21  
22  
23  
24  
25  
26  
27  
28  
29  
30  
31  
32  
33  
34  
35  
36  
37  
38  
39  
40  
41  
42  
43  
44  
45  
46  
47  
48  
49  
50  
51  
52  
53  
54  
55  
56  
57  
58  
59  
60

- 1 45. Akkaya S, Akkaya N, Agladioglu K, et al. Real-time elastography of patellar tendon in patients  
2 with auto-graft bone-tendon-bone anterior cruciate ligament reconstruction. *Archives of*  
3 *Orthopaedic and Trauma Surgery* 2016;136(6):837-42.  
4  
5 46. Feinstein AR, Cicchetti DV. High agreement but low kappa: I. The problems of two paradoxes.  
6 *J Clin Epidemiol* 1990;43(6):543-9.  
7  
8 47. Byrt T, Bishop J, Carlin JB. Bias, prevalence and kappa. *J Clin Epidemiol* 1993;46(5):423-9.  
9  
10 48. Hsiao MY, Chen YC, Lin CY, et al. Reduced patellar tendon elasticity with aging: In vivo  
11 assessment by shear wave elastography. *Ultrasound Med. Biol.* 2015;41(11):2899-905.  
12  
13

For peer review only

1  
2  
3  
4 **1 Figure legends**  
5

6  
7 2

8  
9 3 **Figure 1**

10  
11 4 With the arm located behind the back and the elbow flexed at 90° and the palm facing  
12  
13 5 posteriorly, the probe was placed just laterally from the anterior-lateral corner of the  
14  
15 6 acromion in the longitudinal plane of the supraspinatus tendon.  
16  
17

18  
19 7

20  
21 8 **Figure 2**

22  
23 9 Left side: For measuring elastography characteristics of the supraspinatus tendon, the  
24  
25 10 tendon was split into three parts (3 x 7.7mm), illustrated by the areas of blue, red and green  
26  
27 11 colours. This division was based on a line from the lateral tendon insertion (greater tubercle)  
28  
29 12 to the medial tendon insertion, corresponding to 6.5 mm, and from there a line of 23 mm to  
30  
31 13 the medial tendon with the end point (medial part) being perpendicular to the superior  
32  
33 14 surface of the tendon.  
34  
35

36  
37 15 The yellow circle in the soft part of the deltoid muscle is used as the reference tissue.

38  
39 16 Right side: The three measurement areas (ROIs) and one reference area with elastography  
40  
41 17 characteristics (raw data) during the time of measurement.  
42  
43  
44

45  
46 18

47  
48 19 **Figure 3**

49  
50 20 Left side: Gel pad (mounted on the transducer with a condom used as the other reference  
51  
52 21 area, yellow circle). Right side: The corresponding elastography image/measurements.  
53  
54

55  
56 22

57  
58 23  
59  
60

1  
2  
3  
4 1 Figure 4  
5

6  
7 2 A 6.5 mm chord was drawn (in a lateral direction) from the medial part of the insertion on  
8  
9 3 the humeral head to the lateral part of the tuberculum major. This fixed point (end of the  
10  
11 4 line at the lateral part of the insertion) was used to draw a 23 mm (7.7 x 3) horizontal line in  
12  
13  
14 5 a medial direction ensuring agreement of measuring area.  
15  
16

17 6  
18  
19 7 Figure 5  
20

21 8 Bland-Altman plots with 95% Limits of Agreement for measurements, using respectively raw  
22  
23  
24 9 data, the deltoid muscle and a gel pad as reference areas. Values are based on the mean of  
25  
26 10 the three measured parts across the supraspinatus tendon.  
27  
28  
29  
30  
31  
32  
33  
34  
35  
36  
37  
38  
39  
40  
41  
42  
43  
44  
45  
46  
47  
48  
49  
50  
51  
52  
53  
54  
55  
56  
57  
58  
59  
60



With the arm located behind the back and the elbow flexed 90° with the palm facing towards the posterior direction, the probe is placed just laterally from the anterior-lateral corner of the acromion in the longitudinal plane of the supraspinatus tendon.



Left side: For measuring elastography characteristics of the supraspinatus tendon, the tendon was split into 3 parts (3x7.7mm), illustrated by the areas of blue, red and green colors. This division was based on a line from the lateral tendon insertion (tuberculum majus) to the medial tendon insertion part, corresponding to 6.5 mm, and from there a line of 23 mm to the medial tendon part with the end point (medial part) being perpendicular to the superior surface of the tendon.

The yellow circle in the soft part of the deltoid muscle is used as a reference.

Right side: The three measurements areas (ROI's) and one reference area with elastography characteristics (raw data) during the time of measurement.

451x254mm (72 x 72 DPI)



Left side: Gel pad (mounted on the transducer with a condom used as the other reference area, yellow circle). Right side: The corresponding elastography image/measurements.

1  
2  
3  
4  
5  
6  
7  
8  
9  
10  
11  
12  
13  
14  
15  
16  
17  
18  
19  
20  
21  
22  
23  
24  
25  
26  
27  
28  
29  
30  
31  
32  
33  
34  
35  
36  
37  
38  
39  
40  
41  
42  
43  
44  
45  
46  
47  
48  
49  
50  
51  
52  
53  
54  
55  
56  
57  
58  
59  
60



A 6.5 mm chord was drawn (in the lateral direction) from the medial part of the insertion on the humeral head to the lateral part of the tuberculum major. This fix point (end of the line at the lateral part of the insertion) was used to draw a 23 mm (7.7 x 3) horizontal line in the medial direction ensuring agreement of measuring area.

1  
2  
3  
4  
5  
6  
7  
8  
9  
10  
11  
12  
13  
14  
15  
16  
17  
18  
19  
20  
21  
22  
23  
24  
25  
26  
27  
28  
29  
30  
31  
32  
33  
34  
35  
36  
37  
38  
39  
40  
41  
42  
43  
44  
45  
46  
47  
48  
49  
50  
51  
52  
53  
54  
55  
56  
57  
58  
59  
60

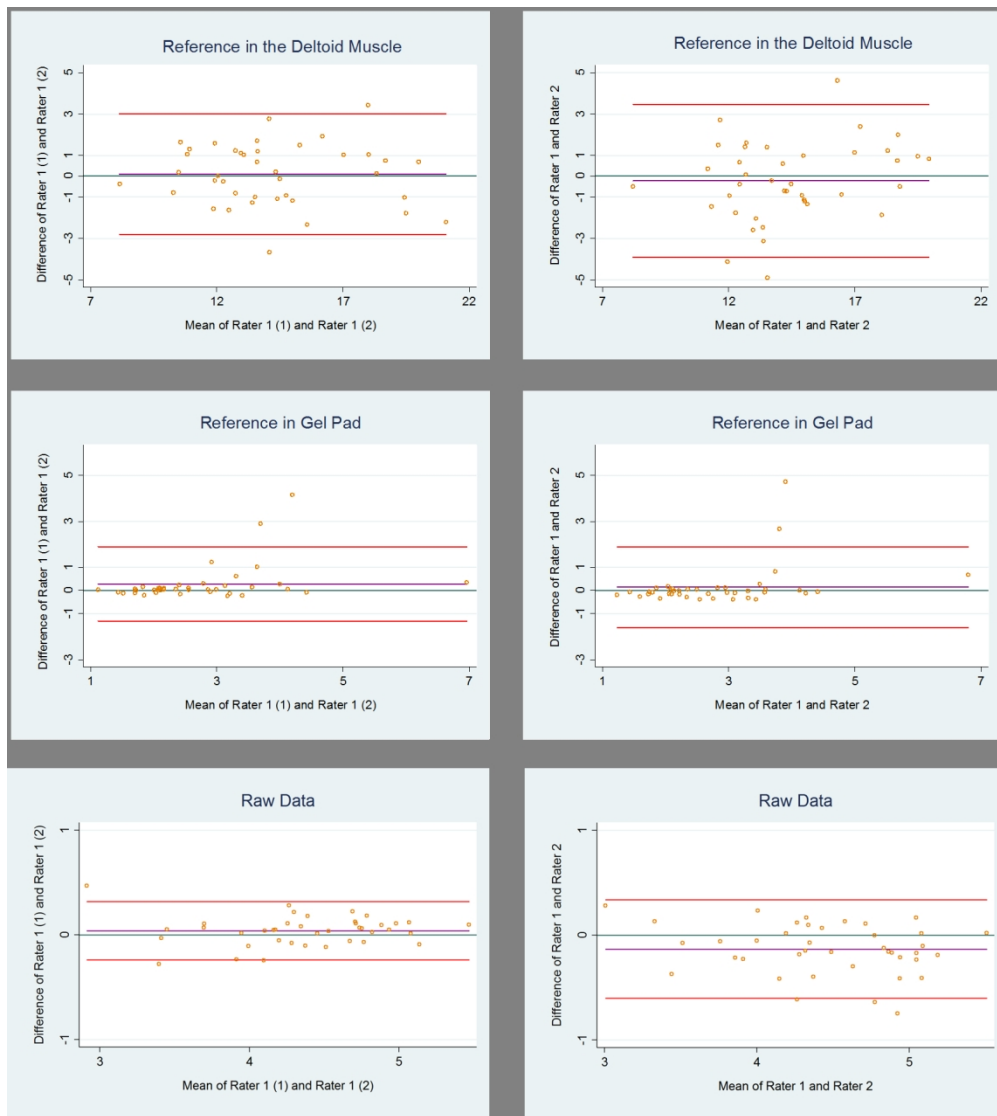

Bland-Altman plots with 95% Limits of Agreement for measurements, using respectively raw data, the deltoid muscle and a gel pad as reference areas. Values are based on the mean of the three measured parts across the supraspinatus tendon.



STROBE Statement—Checklist of items that should be included in reports of *cohort studies*

|                              | Item No | Recommendation                                                                                                                                                                                                                                                                                                         |
|------------------------------|---------|------------------------------------------------------------------------------------------------------------------------------------------------------------------------------------------------------------------------------------------------------------------------------------------------------------------------|
| <b>Title and abstract</b>    | 1       | (a) Indicate the study's design with a commonly used term in the title or the abstract ( <b>p. 1, l. 1</b> )<br>(b) Provide in the abstract an informative and balanced summary of what was done and what was found ( <b>p. 2, l. 1</b> )                                                                              |
| <b>Introduction</b>          |         |                                                                                                                                                                                                                                                                                                                        |
| Background/rationale         | 2       | Explain the scientific background and rationale for the investigation being reported ( <b>p. 4, l. 1</b> )                                                                                                                                                                                                             |
| Objectives                   | 3       | State specific objectives, including any prespecified hypotheses ( <b>p. 6, l. 11</b> )                                                                                                                                                                                                                                |
| <b>Methods</b>               |         |                                                                                                                                                                                                                                                                                                                        |
| Study design                 | 4       | Present key elements of study design early in the paper ( <b>p. 7, l. 2</b> )                                                                                                                                                                                                                                          |
| Setting                      | 5       | Describe the setting, locations, and relevant dates, including periods of recruitment, exposure, follow-up, and data collection ( <b>p. 7, l. 14</b> )                                                                                                                                                                 |
| Participants                 | 6       | (a) Give the eligibility criteria, and the sources and methods of selection of participants. Describe methods of follow-up ( <b>p. 8, l. 1</b> )<br>(b) For matched studies, give matching criteria and number of exposed and unexposed                                                                                |
| Variables                    | 7       | Clearly define all outcomes, exposures, predictors, potential confounders, and effect modifiers. Give diagnostic criteria, if applicable ( <b>p. 10, l. 19</b> )                                                                                                                                                       |
| Data sources/<br>measurement | 8*      | For each variable of interest, give sources of data and details of methods of assessment (measurement). Describe comparability of assessment methods if there is more than one group ( <b>p. 10, l. 19</b> )                                                                                                           |
| Bias                         | 9       | Describe any efforts to address potential sources of bias ( <b>p. 6, l. 1 &amp; p. 11, l. 16</b> )                                                                                                                                                                                                                     |
| Study size                   | 10      | Explain how the study size was arrived at ( <b>p. 4, l. 5</b> )                                                                                                                                                                                                                                                        |
| Quantitative variables       | 11      | Explain how quantitative variables were handled in the analyses. If applicable, describe which groupings were chosen and why ( <b>p. 13, l. 16</b> )                                                                                                                                                                   |
| Statistical methods          | 12      | (a) Describe all statistical methods, including those used to control for confounding<br>(b) Describe any methods used to examine subgroups and interactions<br>(c) Explain how missing data were addressed<br>(d) If applicable, explain how loss to follow-up was addressed<br>(e) Describe any sensitivity analyses |
| <b>Results</b>               |         |                                                                                                                                                                                                                                                                                                                        |
| Participants                 | 13*     | (a) Report numbers of individuals at each stage of study—eg numbers potentially eligible, examined for eligibility, confirmed eligible, included in the study, completing follow-up, and analysed<br>(b) Give reasons for non-participation at each stage<br>(c) Consider use of a flow diagram                        |
| Descriptive data             | 14*     | (a) Give characteristics of study participants (eg demographic, clinical, social) and information on exposures and potential confounders ( <b>p. 15, l. 5</b> )<br>(b) Indicate number of participants with missing data for each variable of interest<br>(c) Summarise follow-up time (eg, average and total amount)  |
| Outcome data                 | 15*     | Report numbers of outcome events or summary measures over time                                                                                                                                                                                                                                                         |
| Main results                 | 16      | (a) Give unadjusted estimates and, if applicable, confounder-adjusted estimates and their precision (eg, 95% confidence interval). Make clear which confounders were adjusted for and why they were included<br>(b) Report category boundaries when continuous variables were categorized                              |

|                          |    |                                                                                                                                                                                                    |
|--------------------------|----|----------------------------------------------------------------------------------------------------------------------------------------------------------------------------------------------------|
|                          |    | (c) If relevant, consider translating estimates of relative risk into absolute risk for a meaningful time period                                                                                   |
| Other analyses           | 17 | Report other analyses done—eg analyses of subgroups and interactions, and sensitivity analyses                                                                                                     |
| <b>Discussion</b>        |    |                                                                                                                                                                                                    |
| Key results              | 18 | Summarise key results with reference to study objectives ( <b>p. 20, l. 1</b> )                                                                                                                    |
| Limitations              | 19 | Discuss limitations of the study, taking into account sources of potential bias or imprecision. Discuss both direction and magnitude of any potential bias ( <b>p. 24, l. 16</b> )                 |
| Interpretation           | 20 | Give a cautious overall interpretation of results considering objectives, limitations, multiplicity of analyses, results from similar studies, and other relevant evidence ( <b>p. 20, l. 18</b> ) |
| Generalisability         | 21 | Discuss the generalisability (external validity) of the study results                                                                                                                              |
| <b>Other information</b> |    |                                                                                                                                                                                                    |
| Funding                  | 22 | Give the source of funding and the role of the funders for the present study and, if applicable, for the original study on which the present article is based ( <b>p. 27, l. 1</b> )               |

\*Give information separately for exposed and unexposed groups.

**Note:** An Explanation and Elaboration article discusses each checklist item and gives methodological background and published examples of transparent reporting. The STROBE checklist is best used in conjunction with this article (freely available on the Web sites of PLoS Medicine at <http://www.plosmedicine.org/>, Annals of Internal Medicine at <http://www.annals.org/>, and Epidemiology at <http://www.epidem.com/>). Information on the STROBE Initiative is available at <http://www.strobe-statement.org>.
